# Supplementary material for: Peptidylprolyl Isomerases as In Vivo Carriers for Drugs That Target Various Intracellular Entities
Source: MDPI journal article supplement (doi:10.3390/biom7040072), 2017-09-29
Supplement: s1 [file s1]

## [Supplementary materials](#)

**Figure S1.** List of aligned FKBDs with the sequence of human FKBP13 (*Fkbp2*) as an arbitrary chosen top reference (pp. 2-6) and the MSA containing the sequence of hFKBP13 and its orthologs expressed in disparate species (pp. 7-12), which was used as one of the input files to the Multi-Dims program that has created the VO\_MSA (Figure 5).

**Figure S2.** Three images of the X-ray structure of human CyPA (2CPL.pdb) shown as spheres with the following color usage: Lys (K) marine blue; Arg (R) violet; His (H) black; Asp (D) and Glu (E) chartreuse; Asn (N), Gln (Q), Gly (G), Thr (T), Ser (S), Pro (P) are in orange whereas hydrophobic AAs are in firebrick (outside CsA-binding cleft) and different shades of pink in the binding cleft. Amino acid residues forming cyclosporin A binding site were labeled. Image 1 – CsA-binding cleft; Image 2 – side-view of the binding cleft; Image 3 – the opposite side of the binding cleft with Val (V1) and Glu (E165) explicitly colored in light sand color (pp. 13-15).

**Figure S3.** MSA of nine sequences of TOR from several organisms, namely 1) *Homo sapiens*; 2) *Mus musculus*; 3) *Rattus norvegicus*; 4) *Ovis aries*; 5) *Capra hircus*; 6-7) two isoforms from *Drosophila melanogaster*; 8-9) two isoforms from *Saccharomyces cerevisiae* (TOR1 and TOR2). Sequence attributes of the aligned sequences are given in Figure S3A (pp. 16-19).

**Figure S4.** Alignment of full sequences of human ATR-ATM-mTOR proteins (pp. 20-24).

**Table S1.** Sequence attributes of several proteins that contribute to the formation of TORC1 and TORC2 complexes (p. 25).

**Table S2.** Human kinases and their co-factors that were found by Lex\_Lyser (pp. 26-57).

**Figure S1 - List of aligned sequences using human sequence of FKBP13 (*Fkbp2*) as arbitrary chosen reference.**

|    |              |        |  |     |                 |  |                                  |
|----|--------------|--------|--|-----|-----------------|--|----------------------------------|
| 1  | NP_004461    | 142AAs |  | 32- | 137/Alg = 106AA |  | [Homo sapiens].                  |
| 2  | NP_001032558 | 140AAs |  | 30- | 135/Alg = 106AA |  | [Bos taurus].                    |
| 3  | NP_032046    | 140AAs |  | 30- | 135/Alg = 106AA |  | [Mus musculus].                  |
| 4  | NP_001253744 | 142AAs |  | 32- | 137/Alg = 106AA |  | [Macaca mulatta].                |
| 5  | NP_001127900 | 140AAs |  | 30- | 135/Alg = 106AA |  | [Rattus norvegicus].             |
| 6  | NP_001107353 | 141AAs |  | 31- | 136/Alg = 106AA |  | [Xenopus tropicalis].            |
| 7  | NP_001004677 | 138AAs |  | 28- | 133/Alg = 106AA |  | [Danio rerio].                   |
| 8  | NP_001158699 | 137AAs |  | 27- | 132/Alg = 106AA |  | [Oncorhynchus mykiss].           |
| 9  | NP_001188070 | 138AAs |  | 28- | 133/Alg = 106AA |  | [Ictalurus punctatus].           |
| 10 | NP_001079493 | 141AAs |  | 31- | 136/Alg = 106AA |  | [Xenopus laevis].                |
| 11 | NP_001299353 | 145AAs |  | 35- | 140/Alg = 106AA |  | [Papilio xuthus].                |
| 12 | NP_010807    | 135AAs |  | 24- | 132/Alg = 109AA |  | [Saccharomyces cerevisiae S288c] |
| 13 | JAO69915     | 138AAs |  | 28- | 133/Alg = 106AA |  | [Poeciliopsis prolifica].        |
| 14 | XP_016084356 | 138AAs |  | 28- | 133/Alg = 106AA |  | [Sinocyclocheilus graham         |
| 15 | XP_016071878 | 140AAs |  | 30- | 135/Alg = 106AA |  | [Miniopterus natalensis]         |
| 16 | XP_016041686 | 139AAs |  | 29- | 134/Alg = 106AA |  | [Erinaceus europaeus].           |
| 17 | XP_015974039 | 140AAs |  | 30- | 135/Alg = 106AA |  | [Rousettus ae                    |
| 18 | XP_006980788 | 140AAs |  | 30- | 135/Alg = 106AA |  | [Peromyscus m                    |
| 19 | XP_015826586 | 138AAs |  | 28- | 133/Alg = 106AA |  | [Nothobranchius furzeri]         |
| 20 | XP_015744729 | 141AAs |  | 31- | 136/Alg = 106AA |  | [Python bivittatus].             |
| 21 | XP_015683908 | 141AAs |  | 31- | 136/Alg = 106AA |  | [Protobothrops mucrosqua         |
| 22 | XP_007244563 | 138AAs |  | 28- | 133/Alg = 106AA |  | [Astyanax mexicanus].            |
| 23 | XP_006911221 | 140AAs |  | 30- | 135/Alg = 106AA |  | [Pteropus ale                    |
| 24 | XP_006771685 | 140AAs |  | 30- | 135/Alg = 106AA |  | [Myotis davidii].                |
| 25 | XP_015397493 | 140AAs |  | 30- | 135/Alg = 106AA |  | [Panthera tigris altaica         |
| 26 | XP_015333657 | 140AAs |  | 30- | 135/Alg = 106AA |  | [Marmota marmota marmota         |
| 27 | XP_005577499 | 142AAs |  | 32- | 137/Alg = 106AA |  | [Macaca fascicularis].           |
| 28 | XP_015272310 | 141AAs |  | 31- | 136/Alg = 106AA |  | [Gekko japoni                    |
| 29 | XP_015248799 | 139AAs |  | 29- | 134/Alg = 106AA |  | [Cyprinodon variegatus].         |
| 30 | XP_015105405 | 140AAs |  | 30- | 135/Alg = 106AA |  | [Vicugna paco                    |

|    |              |        |  |                     |  |                          |
|----|--------------|--------|--|---------------------|--|--------------------------|
| 31 | XP_014969226 | 142AAs |  | 32- 137/Alg = 106AA |  | [Macaca mulat            |
| 32 | XP_011957484 | 140AAs |  | 30- 135/Alg = 106AA |  | [Ovis aries].            |
| 33 | XP_014856097 | 138AAs |  | 28- 133/Alg = 106AA |  | [Poecilia mex            |
| 34 | XP_014935343 | 140AAs |  | 30- 135/Alg = 106AA |  | [Acinonyx jubatus].      |
| 35 | XP_014748502 | 138AAs |  | 28- 133/Alg = 106AA |  | [Sturnus vulgaris].      |
| 36 | XP_014700413 | 140AAs |  | 30- 135/Alg = 106AA |  | [Equus asinus            |
| 37 | XP_006149888 | 140AAs |  | 30- 135/Alg = 106AA |  | [Tupaia chine            |
| 38 | XP_005864247 | 140AAs |  | 30- 135/Alg = 106AA |  | [Myotis brandtii].       |
| 39 | XP_006176941 | 140AAs |  | 30- 135/Alg = 106AA |  | [Camelus ferus].         |
| 40 | XP_006129809 | 144AAs |  | 31- 136/Alg = 106AA |  | [Pelodiscus s            |
| 41 | XP_006036922 | 142AAs |  | 32- 137/Alg = 106AA |  | [Alligator sinensis].    |
| 42 | XP_005988896 | 141AAs |  | 31- 136/Alg = 106AA |  | [Latimeria ch            |
| 43 | XP_005894189 | 140AAs |  | 30- 135/Alg = 106AA |  | [Bos mutus].             |
| 44 | XP_005808854 | 138AAs |  | 28- 133/Alg = 106AA |  | [Xiphophorus maculatus]. |
| 45 | XP_006106614 | 140AAs |  | 30- 135/Alg = 106AA |  | [Myotis lucifugus].      |
| 46 | XP_008952214 | 142AAs |  | 32- 137/Alg = 106AA |  | [Pan paniscus].          |
| 47 | XP_013976757 | 140AAs |  | 30- 135/Alg = 106AA |  | [Canis lupus             |
| 48 | XP_003828606 | 142AAs |  | 32- 137/Alg = 106AA |  | [Pan paniscus].          |
| 49 | XP_013873214 | 138AAs |  | 28- 133/Alg = 106AA |  | [Austrofundulus limnaeus |
| 50 | XP_005660807 | 140AAs |  | 30- 135/Alg = 106AA |  | [Sus scrofa].            |
| 51 | XP_005699908 | 140AAs |  | 30- 135/Alg = 106AA |  | [Capra hircus            |
| 52 | XP_005736999 | 138AAs |  | 28- 133/Alg = 106AA |  | [Pundamilia nyererei].   |
| 53 | XP_005384688 | 140AAs |  | 30- 135/Alg = 106AA |  | [Chinchilla l            |
| 54 | XP_005333562 | 140AAs |  | 30- 135/Alg = 106AA |  | [Ictidomys tridecemlinea |
| 55 | XP_003452386 | 138AAs |  | 28- 133/Alg = 106AA |  | [Oreochromis niloticus]. |
| 56 | XP_005351906 | 140AAs |  | 30- 135/Alg = 106AA |  | [Microtus och            |
| 57 | XP_013006176 | 140AAs |  | 30- 135/Alg = 106AA |  | [Cavia porcellus].       |
| 58 | JAI39202     | 139AAs |  | 28- 133/Alg = 106AA |  | [Bactrocera latifrons].  |
| 59 | XP_012975627 | 140AAs |  | 30- 135/Alg = 106AA |  | [Mesocricetus            |
| 60 | XP_010898827 | 137AAs |  | 27- 132/Alg = 106AA |  | [Esox lucius].           |
| 61 | XP_004852587 | 138AAs |  | 28- 133/Alg = 106AA |  | [Heterocephal            |

|    |              |        |  |     |                 |  |                          |
|----|--------------|--------|--|-----|-----------------|--|--------------------------|
| 62 | XP_004770232 | 140AAs |  | 30- | 135/Alg = 106AA |  | [Mustela puto            |
| 63 | XP_012876646 | 140AAs |  | 30- | 135/Alg = 106AA |  | [Dipodomys ordii].       |
| 64 | XP_012816015 | 141AAs |  | 31- | 136/Alg = 106AA |  | [Xenopus trop            |
| 65 | XP_004656659 | 140AAs |  | 30- | 135/Alg = 106AA |  | [Jaculus jacu            |
| 66 | XP_004618432 | 140AAs |  | 30- | 135/Alg = 106AA |  | [Sorex araneu            |
| 67 | XP_012666155 | 140AAs |  | 30- | 135/Alg = 106AA |  | [Otolemur gar            |
| 68 | XP_004596785 | 139AAs |  | 29- | 134/Alg = 106AA |  | [Ochotona princeps].     |
| 69 | XP_012581059 | 140AAs |  | 30- | 135/Alg = 106AA |  | [Condylura cr            |
| 70 | XP_012633386 | 140AAs |  | 30- | 135/Alg = 106AA |  | [Microcebus m            |
| 71 | XP_012520835 | 140AAs |  | 30- | 135/Alg = 106AA |  | [Propithecus coquereli]. |
| 72 | XP_004394068 | 140AAs |  | 30- | 135/Alg = 106AA |  | [Odobenus ros            |
| 73 | XP_012408303 | 139AAs |  | 29- | 134/Alg = 106AA |  | [Sarcophilus harrisii].  |
| 74 | XP_004264331 | 140AAs |  | 30- | 135/Alg = 106AA |  | [Orcinus orca            |
| 75 | XP_012351963 | 142AAs |  | 32- | 137/Alg = 106AA |  | [Nomascus leucogenys].   |
| 76 | XP_004643825 | 140AAs |  | 30- | 135/Alg = 106AA |  | [Octodon degus].         |
| 77 | XP_004643824 | 140AAs |  | 30- | 135/Alg = 106AA |  | [Octodon degus].         |
| 78 | XP_004479918 | 140AAs |  | 30- | 135/Alg = 106AA |  | [Dasypus novemcinctus].  |
| 79 | XP_003274202 | 142AAs |  | 32- | 137/Alg = 106AA |  | [Nomascus leucogenys].   |
| 80 | XP_004479917 | 140AAs |  | 30- | 135/Alg = 106AA |  | [Dasypus novemcinctus].  |
| 81 | XP_012318520 | 142AAs |  | 32- | 137/Alg = 106AA |  | [Ao                      |
| 82 | XP_011718910 | 142AAs |  | 32- | 137/Alg = 106AA |  | [Macaca nemestrina].     |
| 83 | XP_011897294 | 142AAs |  | 32- | 137/Alg = 106AA |  | [Cercocebus atys].       |
| 84 | XP_011848866 | 142AAs |  | 32- | 137/Alg = 106AA |  | [Mandrillus l            |
| 85 | XP_011797983 | 142AAs |  | 32- | 137/Alg = 106AA |  | [Colobus angolensis pall |
| 86 | XP_003974414 | 138AAs |  | 28- | 133/Alg = 106AA |  | [Takifugu rubripes].     |
| 87 | XP_004068088 | 138AAs |  | 28- | 133/Alg = 106AA |  | [Oryzias latipes].       |
| 88 | XP_011367027 | 140AAs |  | 30- | 135/Alg = 106AA |  | [Pteropus vam            |
| 89 | XP_006937524 | 184AAs |  | 74- | 179/Alg = 106AA |  | [Felis catus]            |
| 90 | XP_011219931 | 140AAs |  | 30- | 135/Alg = 106AA |  | [Ailuropoda m            |
| 91 | XP_010993050 | 140AAs |  | 30- | 135/Alg = 106AA |  | [Camelus drom            |
| 92 | XP_010836289 | 140AAs |  | 30- | 135/Alg = 106AA |  | [Bison bison             |
| 93 | XP_010770745 | 138AAs |  | 28- | 133/Alg = 106AA |  | [Notothenia coriiceps].  |

|     |              |        |  |     |         |   |       |  |                                   |
|-----|--------------|--------|--|-----|---------|---|-------|--|-----------------------------------|
| 94  | XP_010752642 | 138AAs |  | 28- | 133/Alg | = | 106AA |  | [ <i>Larimichthys crocea</i> ].   |
| 95  | XP_010597383 | 140AAs |  | 30- | 135/Alg | = | 106AA |  | [ <i>Loxodonta af</i>             |
| 96  | XP_010634398 | 140AAs |  | 30- | 135/Alg | = | 106AA |  | [ <i>Fukomys dama</i>             |
| 97  | XP_010346544 | 142AAs |  | 32- | 137/Alg | = | 106AA |  | [ <i>Saimiri boliviensis bol</i>  |
| 98  | XP_010375362 | 142AAs |  | 32- | 137/Alg | = | 106AA |  | [ <i>Rhinopithecus roxellana</i>  |
| 99  | XP_010375348 | 142AAs |  | 32- | 137/Alg | = | 106AA |  | [ <i>Rhinopithecus roxellana</i>  |
| 100 | XP_009421628 | 142AAs |  | 32- | 137/Alg | = | 106AA |  | [ <i>Pan troglodytes</i> ].       |
| 101 | XP_009244471 | 142AAs |  | 32- | 137/Alg | = | 106AA |  | [ <i>Pongo abelii</i> ].          |
| 102 | XP_003909669 | 142AAs |  | 32- | 137/Alg | = | 106AA |  | [ <i>Papio anubis</i> ].          |
| 103 | XP_008837174 | 140AAs |  | 30- | 135/Alg | = | 106AA |  | [ <i>Nannospalax</i>              |
| 104 | XP_008707188 | 140AAs |  | 30- | 135/Alg | = | 106AA |  | [ <i>Ursus mariti</i>             |
| 105 | XP_008565641 | 140AAs |  | 30- | 135/Alg | = | 106AA |  | [ <i>Galeopterus variegatus</i> ] |
| 106 | XP_008304826 | 138AAs |  | 28- | 133/Alg | = | 106AA |  | [ <i>Stegastes partitus</i> ].    |
| 107 | XP_008255497 | 182AAs |  | 29- | 134/Alg | = | 106AA |  | [ <i>Or</i>                       |
| 108 | XP_005305586 | 141AAs |  | 31- | 136/Alg | = | 106AA |  | [ <i>Chrysemys picta bellii</i> ] |
| 109 | XP_008047615 | 140AAs |  | 30- | 135/Alg | = | 106AA |  | [ <i>Tarsius syrichta</i> ].      |
| 110 | XP_007992347 | 142AAs |  | 32- | 137/Alg | = | 106AA |  | [ <i>Chlorocebus</i>              |
| 111 | XP_007943021 | 140AAs |  | 30- | 135/Alg | = | 106AA |  | [ <i>Orycteropus</i>              |
| 112 | XP_007608803 | 140AAs |  | 30- | 135/Alg | = | 106AA |  | [ <i>Cricetulus g</i>             |
| 113 | JAC52726     | 139AAs |  | 28- | 133/Alg | = | 106AA |  | [ <i>Bactrocera dorsalis</i> ].   |
| 114 | XP_007462141 | 140AAs |  | 30- | 135/Alg | = | 106AA |  | [ <i>Lipotes vexe</i>             |
| 115 | XP_007174388 | 140AAs |  | 30- | 135/Alg | = | 106AA |  | [ <i>Balaenoptera</i>             |
| 116 | XP_006050940 | 140AAs |  | 30- | 135/Alg | = | 106AA |  | [ <i>Bubalus buba</i>             |
| 117 | XP_007070374 | 141AAs |  | 31- | 136/Alg | = | 106AA |  | [ <i>Chelonia mydas</i> ].        |
| 118 | XP_007102658 | 140AAs |  | 30- | 135/Alg | = | 106AA |  | [ <i>Physeter cat</i>             |
| 119 | XP_006901562 | 140AAs |  | 30- | 135/Alg | = | 106AA |  | [ <i>Elephantulus</i>             |
| 120 | XP_006746300 | 140AAs |  | 30- | 135/Alg | = | 106AA |  | [ <i>Leptonychote</i>             |
| 121 | JAC05186     | 138AAs |  | 27- | 132/Alg | = | 106AA |  | [ <i>Ceratitis capitata</i> ].    |
| 122 | XP_005983463 | 140AAs |  | 30- | 135/Alg | = | 106AA |  | [ <i>Pantholops h</i>             |
| 123 | JAB39795     | 142AAs |  | 32- | 137/Alg | = | 106AA |  | [ <i>Callithrix jacchus</i> ].    |
| 124 | XP_004051480 | 142AAs |  | 32- | 137/Alg | = | 106AA |  | [ <i>Gorilla goril</i>            |

|     |              |        |  |     |                 |  |                          |
|-----|--------------|--------|--|-----|-----------------|--|--------------------------|
| 125 | AEJ84311     | 140AAs |  | 30- | 135/Alg = 106AA |  | [Capra hircus].          |
| 126 | Q54SR7       | 133AAs |  | 28- | 133/Alg = 106AA |  |                          |
| 127 | XP_014452900 | 132AAs |  | 32- | 128/Alg = 97AA  |  | [Alligator mi            |
| 128 | XP_014354594 | 145AAs |  | 35- | 140/Alg = 106AA |  | [Papilio machaon].       |
| 129 | JAN41653     | 138AAs |  | 28- | 133/Alg = 106AA |  | [Daphnia magna].         |
| 130 | XP_014287548 | 143AAs |  | 33- | 138/Alg = 106AA |  | [Halyomorpha halys].     |
| 131 | XP_014211126 | 151AAs |  | 30- | 135/Alg = 106AA |  | [Copidosoma floridanum]. |
| 132 | XP_014090010 | 139AAs |  | 28- | 133/Alg = 106AA |  | [Bactrocera oleae].      |
| 133 | XP_013186102 | 146AAs |  | 36- | 141/Alg = 106AA |  | [Amyelois transitella].  |
| 134 | XP_004383846 | 140AAs |  | 30- | 135/Alg = 106AA |  | [Trichechus m            |
| 135 | XP_004931279 | 146AAs |  | 36- | 141/Alg = 106AA |  | [Bombyx mori].           |
| 136 | XP_012254607 | 150AAs |  | 28- | 133/Alg = 106AA |  | [Athalia rosae].         |
| 137 | XP_004536978 | 138AAs |  | 27- | 132/Alg = 106AA |  | [Ceratitis capitata].    |
| 138 | XP_785999    | 142AAs |  | 30- | 135/Alg = 106AA |  | [Strongylocentrotus purp |
| 139 | XP_011560028 | 137AAs |  | 27- | 132/Alg = 106AA |  | [Plutella xylostella].   |
| 140 | XP_011211190 | 139AAs |  | 28- | 133/Alg = 106AA |  | [Bactrocera dorsalis].   |
| 141 | KFO28453     | 140AAs |  | 30- | 135/Alg = 106AA |  | [Fukomys damarensis].    |
| 142 | XP_001600159 | 147AAs |  | 26- | 131/Alg = 106AA |  | [Nasonia vitripennis].   |
| 143 | JAB53650     | 141AAs |  | 31- | 136/Alg = 106AA |  | [Micrurus fulvius].      |
| 144 | KTG33021     | 138AAs |  | 28- | 133/Alg = 106AA |  | [Cyprinus carpio].       |
| 145 | JAI11984     | 141AAs |  | 31- | 136/Alg = 106AA |  | [Crotalus adamanteus].   |
| 146 | JAA96089     | 141AAs |  | 31- | 136/Alg = 106AA |  | [Crotalus horridus].     |

Figure S1A. MSA of hFKBP13 (Fkbp2) and some of its orthologues expressed in miscellaneous species (see Fig. S1).

```

NP_004461      QIGVKKRV--DHCPIKSRKGDVLHMHYTG-KLEDGTEFDSSLPQNQPFVFSLGTGQVIKG
NP_001032558  QIGVKKRV--DHCPIKSRKGDVLHMHYTG-KLEDGTEFDSSLPQNQPFVFSLGTGQVIKG
NP_032046      QIGVKKRV--DHCPIKSRKGDVLHMHYTG-KLEDGTEFDSSLPQNQPFVFSLGTGQVIKG
NP_001253744  QIGVKKRV--DHCPIKSRKGDVLHMHYTG-KLEDGTEFDSSLPQNQPFVFSLGTGQVIKG
NP_001127900  QIGVKKRV--DHCPIKSRKGDVLHMHYTG-KLEDGTEFDSSLPQNQPFVFSLGTGQVIKG
NP_001107353  QIGVKKRV--ENCLVKSARKGDTLHMHYTG-KLEDGTEFDSSIPRNQAFVFTLGTGQVIKG
NP_001004677  QIGIKKRV--DNCPIKSRKGDVLNMHYTG-KLEDGTEFDSSIPRNQPFVFTLGTGQVIKG
NP_001158699  QIGIKKRV--DNCPIKSRKGDVLNMHYTG-KLEDGTEFDSSIPRNQPFVFTLGTGQVIKG
NP_001188070  QIGIKKRV--ENCPIKSRKGDVLNMHYTG-RLEDGTEFDSSIPRNQPFVFTLGTGQVIKG
NP_001079493  QIGVKKRV--ENCPVKSRKGDVLHMHYTG-KLEDGTEFDSSIPRNQPFVFTLGTGQVIKG
NP_001299353  QIGVKKRV--SECPKSRKGDLLHMHYTG-TLEDGTEFDSSIPRNQPFVFTLGTGQVIKG
NP_010807      EIGIIKRIPVEDCLIKAMPGDKVKVHYTGSLLESSTVFDSSYSRGSPIAFELGVGRVIKG
JAO69915      QIGIKKRV--DNCPIKSRKGDVLNMHYTG-RLEDGTEFDSSIPRNQPFVFTLGTGQVIKG
XP_016084356  QIGIKKRV--DNCPIKSRKGDVLNMHYTG-KLEDGTEFDSSIPRNQPFVFTLGTGQVIKG
XP_016071878  QIGVKKRV--EHCPIKSRKGDVLHMHYTG-KLEDGTEFDSSLPQNQPFVFSLGTGQVIKG
XP_016041686  QIGVKKRV--DHCPIKSRKGDVLHMHYTG-KLEDGTEFDSSLPQNQPFVFSLGTGQVIKG
XP_015974039  QIGVKKRV--DHCPIKSRKGDVLHMHYTG-KLEDGTEFDSSLPQNQPFVFSLGTGQVIKG
XP_006980788  QIGVKKRV--DHCPIKSRKGDVLHMHYTG-KLEDGTEFDSSLPQNQPFVFSLGTGQVIKG
XP_015826586  QIGIKKRV--DNCPIKSRKGDVLNMHYTG-KLEDGTEFDSSIPRDRPFTLGTGQVIKG
XP_015744729  QIGVKKRV--DNCPIKSRKGDVLHMHYTG-KLEDGTEFDSSLPQNQPFVFSLGTGQVIKG
XP_015683908  QIGVKKRV--DNCPIKSRKGDVLHMHYTG-KLEDGTEFDSSLPQNQPFVFSLGTGQVIKG
XP_007244563  QIGIKKRV--DNCPIKSRKGDVLNMHYTG-KLEDGTEFDSSIPRNQPFVFTLGTGQVIKG
XP_006911221  QIGVKKRV--DHCPIKSRKGDVLHMHYTG-KLEDGTEFDSSLPQNQPFVFSLGTGQVIKG
XP_006771685  QIGVKKRV--DHCPIKSRKGDVLHMHYTG-KLEDGTEFDSSLPQNQPFVFSLGTGQVIKG
XP_015397493  QIGVKKRV--DHCPIKSRKGDVLHMHYTG-KLEDGTEFDSSLPQNQPFVFSLGTGQVIKG
XP_015333657  QIGVKKRV--DHCPIKSRKGDVLHMHYTG-KLEDGTEFDSSLPQNQPFVFSLGTGQVIKG
XP_005577499  QIGVKKRV--DHCPIKSRKGDVLHMHYTG-KLEDGTEFDSSLPQNQPFVFSLGTGQVIKG
XP_015272310  QIGVKKRV--DNCPIKSRKGDVLHMHYTG-KLEDGTEFDSSLPQNQPFVFSLGTGQVIKG
XP_015248799  QIGIKKRV--DNCPIKSRKGDVLNMHYTG-KLEDGTEFDSSIPRDRPFTLGTGQVIKG
XP_015105405  QIGVKKRV--DHCPIKSRKGDVLHMHYTG-KLEDGTEFDSSLPQNQPFVFSLGTGQVIKG
XP_014969226  QIGVKKRV--DHCPIKSRKGDVLHMHYTG-KLEDGTEFDSSLPQNQPFVFSLGTGQVIKG
XP_011957484  QIGVKKRV--DHCPIKSRKGDVLHMHYTG-KLEDGTEFDSSLPQNQPFVFSLGTGQVIKG
XP_014856097  QIGIKKRV--DNCPIKSRKGDVLNMHYTG-KLEDGTEFDSSIPRNQPFVFTLGTGQVIKG
XP_014935343  QIGVKKRV--DHCPIKSRKGDVLHMHYTG-KLEDGTEFDSSLPQNQPFVFSLGTGQVIKG
XP_014748502  QIGVRRRP--ERCGRSRRKGDVLTLHYSG-TLEDGTLFDSSLSRQPFVFSLGTGQVIKG
XP_014700413  QIGVKKRV--DHCPIKSRKGDVLHMHYTG-KLEDGTEFDSSLPQNQPFVFSLGTGQVIKG
XP_006149888  QIGVKKRV--DHCPIKSRKGDVLHMHYTG-KLEDGTEFDSSLPQNQPFVFSLGTGQVIKG
XP_005864247  QIGVKKRV--DHCPIKSRKGDVLHMHYTG-KLEDGTEFDSSLPQNQPFVFSLGTGQVIKG
XP_006176941  QIGVKKRV--DHCPIKSRKGDVLHMHYTG-KLEDGTEFDSSLPQNQPFVFSLGTGQVIKG
XP_006129809  QIGVKKRV--ENCPIKSRKGDVLHMHYTG-KLEDGTEFDSSIPRDRPFTLGTGQVIKG
XP_006036922  QIGVKKRV--ENCGLSRKGDVLTMHYTG-RLEDGSEFDSSLPQNQPFVFSLGTGQVIKG
XP_005988896  QIGVKKRV--DNCPIKSRKGDVLHMHYTG-MLEDGTEFDSSIPRNQPFVFTLGTGQVIKG
XP_005894189  QIGVKKRV--DHCPIKSRKGDVLHMHYTG-KLEDGTEFDSSLPQNQPFVFSLGTGQVIKG
XP_005808854  QIGIKKRV--DNCPIKSRKGDVLNMHYTG-KLEDGTEFDSSIPRDRPFTLGTGQVIKG
XP_006106614  QIGVKKRV--DHCPIKSRKGDVLHMHYTG-KLEDGTEFDSSLPQNQPFVFSLGTGQVIKG
XP_008952214  QIGVKKRV--DHCPIKSRKGDVLHMHYTG-KLEDGTEFDSSLPQNQPFVFSLGTGQVIKG
XP_013976757  QIGVKKRV--DHCPIKSRKGDVLHMHYTG-KLEDGTEFDSSLPQNQPFVFSLGTGQVIKG
XP_003828606  QIGVKKRV--DHCPIKSRKGDVLHMHYTG-KLEDGTEFDSSLPQNQPFVFSLGTGQVIKG
XP_013873214  QIGIKKRV--DNCPIKSRKGDVLNMHYTG-KLEDGTEFDSSIPRDRPFTLGTGQVIKG
XP_005660807  QIGVKKRV--DHCPIKSRKGDVLHMHYTG-KLEDGTEFDSSLPQNQPFVFSLGTGQVIKG
XP_005699908  QIGVKKRV--DHCPIKSRKGDVLHMHYTG-KLEDGTEFDSSLPQNQPFVFSLGTGQVIKG
XP_005736999  QIGIKKRV--DNCPIKSRKGDVLNMHYTG-KLEDGTEFDSSIPRDRPFTLGTGQVIKG
XP_005384688  QIGVKKRV--DHCPIKSRKGDVLHMHYTG-KLEDGTEFDSSLPQNQPFVFSLGTGQVIKG
XP_005333562  QIGVKKRV--DHCPIKSRKGDVLHMHYTG-KLEDGTEFDSSLPQNQPFVFSLGTGQVIKG
XP_003452386  QIGIKKRV--DNCPIKSRKGDVLNMHYTG-KLEDGTEFDSSIPRDRPFTLGTGQVIKG
XP_005351906  QIGVKKRV--DHCPIKSRKGDVLHMHYTG-KLEDGTEFDSSLPQNQPFVFSLGTGQVIKG
XP_013006176  QIGVKKRV--DHCPIKSRKGDVLHMHYTG-KLEDGTEFDSSLPQNQPFVFSLGTGQVIKG

```





|              |                                                               |
|--------------|---------------------------------------------------------------|
| XP_007102658 | QIGVKKRV--DHCPIKSRKGDVLHMHYTG-KLEDGTEFDSSLPQNQPFVFSLGTGQVIKG  |
| XP_006901562 | QIGVKKRV--DHCPIKSRKGDVLHMHYTG-KLEDGTEFDSSLPQNQPFVFSLGTGQVIKG  |
| XP_006746300 | QIGVKKRV--DHCPIKSRKGDVLHMHYTG-KLEDGTEFDSSLPQNQPFVFSLGTGQVIKG  |
| JAC05186     | RIGIKKRA--ENCEIKARKGDTIHVHYRG-TLKDGTEDFDSSYGRNKAFSVRLGAGQVIKG |
| XP_005983463 | QIGVKKRV--DHCPIKSRKGDVLHMHYTG-KLEDGTEFDSSLPQNQPFVFSLGTGQVIKG  |
| JAB39795     | QIGVKKRV--DHCPIKSRKGDVLHMHYTG-KLEDGTEFDSSLPQNQPFVFSLGTGQVIKG  |
| XP_004051480 | QIGVKKRV--DHCPIKSRKGDVLHMHYTG-KLEDGTEFDSSLPQNQPFVFSLGTGQVIKG  |
| AEJ84311     | QIGVKKRV--DHCPIKSRKGDVLHMHYTG-SLEDGTEFDSSLPQNQPFVFSLGTGQVIKG  |
| Q54SR7       | QIGVKYRP--DECTVKTSGDKLKIHYTG-TLLNGDKFDSSVDRGTPFEFKIGVGQVIKG   |
| XP_014452900 | QIGVKKRV--ENCGLRSRKGDVLTMHYTG-RLEDGSEFDSSLGRAQPFVFSLGTGQVIKG  |
| XP_014354594 | QIGVKKRP--SECPIKSRKGDLLHMHYTG-TLEDGTEFDSSLPRGNPLTFTLGSGQVIKG  |
| JAN41653     | QIGIKKRV--DNCTVKSARKGDLLHMHYTG-TLEDGTEFDSSIPRGQPLTFTLGSGQVIKG |
| XP_014287548 | QIGIKKRI--DNCTKKSARKGDLLHMHYTG-KLEDGTVFDSSYDRKQPLTFTLGFGQVIRG |
| XP_014211126 | QIGVKKRV--DNCTLSRKGDTLVVNYVG-TLEDGTEFDSSSNYDDSFITLGYGQVIKG    |
| XP_014090010 | KIGIKKRV--ENCEVKARKGDTIHVHYRG-TLKDGTEDFDSSYDRNKAFSVRLGAGQVIKG |
| XP_013186102 | QIGVKKRP--AECPIKSRKGDLLHMHYTG-TLEDGTEFDSSIPRGNPLTFTLGSGQVIKG  |
| XP_004383846 | QIGVKKRV--DHCPIKSRKGDVLHMHYTG-KLEDGTEFDSSLPQNQPFVFSLGTGQVIKG  |
| XP_004931279 | QIGIKTRP--EDCSIKSRKGDLLHMHYTG-TLDDGTEFDSSIPRGNPLTFKLGSQVIKG   |
| XP_012254607 | QIGIKKRV--EKC NVRSKKGDTLYVHYVG-TLEDGTEIDSSSIHGEPPLVTLGYRQVIKG |
| XP_004536978 | RIGIKKRA--ENCEIKARKGDTIHVHYRG-TLKDGTEDFDSSYGRNKAFSVRLGAGQVIKG |
| XP_785999    | QIGIKKKV--EDCTTRSRTGDRLSMHYTG-KLEDGTEFDSSIPRKQTFDFTLGAGQVIKG  |
| XP_011560028 | QIGIKKRP--AECSMKTRKGDLLHIHYTG-TLVDGTEFDSSYSRKMPITFTLGSGQVIKG  |
| XP_011211190 | KIGIKKRA--ENCEVKARKGDTIHVHYRG-TLKDGTEDFDSSYDRNKAFSVRLGAGQVIKG |
| KFO28453     | QIGVKKRV--DHCPIKSRKGDVLHMHYTG-KLEDGTEFDSSLPQNQPFVFSLGTGQVIKG  |
| XP_001600159 | QIGIKKRV--DNCTLSRKGDTLFVNYVG-TLEDGTEFDKSSNYEDSFLVTLGYGQVIKG   |
| JAB53650     | QIGVKKRV--DNCPIKSRKGDVLHMHYTG-KLEDGTEFDSSLTRDQPFIFSLGTGQVIKG  |
| KTG33021     | QIGIKKRV--DNCPIKSRKGDVLNMHYTG-KLEDGTEFDSSIPRNQPFITFTLGTGQVIKG |
| JAI11984     | QIGVKKRV--DNCPVKSRKGDVLHMHYTG-KLEDGTEFDSSLTRDQPFIFSLGTGQVIKG  |
| JAA96089     | QIGVKKRV--DNCPIKSRKGDVLHMHYTG-KLEDGTEFDSSLTRDQPFIFSLGTGQVIKG  |

.\*\* :                      \*    ::       \*    :    ::\* \*    \*    .\*    :\*. \*               . :    .    : \*    :\*\*\* :

|              |                                                   |
|--------------|---------------------------------------------------|
| NP_004461    | WDQGLLGMCEGEKRLVIPSELGYGERGAPPKIPGGATLVFEVELLKIE  |
| NP_001032558 | WDQGLLGMCEGEKRLVIPSELGYGERGAPPKIPGGATLVFEVELLKIE  |
| NP_032046    | WDQGLLGMCEGEKRLVIPSELGYGERGAPPKIPGGATLVFEVELLKIE  |
| NP_001253744 | WDQGLLGMCEGEKRLVIPSELGYGERGAPPKIPGGATLVFEVELLKIE  |
| NP_001127900 | WDQGLLGMCEGEKRLVIPSELGYGERGAPPKIPGGATLVFEVELLKIE  |
| NP_001107353 | WDQGLLGMCEGEKRLVIPSELGYGDRGAPPKIPGGATLIFEVELLKIE  |
| NP_001004677 | WDQGLLGMCEGEKRLVIPSELGYGDRGAPPKIPGGATLIFEVELLNIE  |
| NP_001158699 | WDQGLLGMCEGEKRLVIPSELGYGDRGAPPKIPGGATLIFEVELLSIE  |
| NP_001188070 | WDQGLLGMCEGEKRLVIPSELGYGDRGAPPKIPGGATLIFEVELLSIE  |
| NP_001079493 | WDQGLLGMCEGEKRLVIPSELGYGDRGAPPKIPGGATLIFEVELLKIE  |
| NP_001299353 | WDQGLIGMCEGEQRKLVIPPELAYGENGSPPKIPKSATLTFHVDLVKIE |
| NP_010807    | WDQGVAGMCVGEKRLQIPSSLAYGERGVPGVIPPSADLVFDVELVDVK  |
| JAO69915     | WDQGLLGMCEGEKRLVIPAELGYGDRGAPPKIPGGATLIFEVELLSIE  |
| XP_016084356 | WDQGLLGMCEGEKRLVIPSELGYGDRGAPPKIPGGATLIFEVELLSIE  |
| XP_016071878 | WDQGLLGMCEGEKRLVIPSELGYGERGAPPKIPGGATLVFEVELLKIE  |
| XP_016041686 | WDQGLLGMCEGEKRLVIPSELGYGERGAPPKIPGGATLVFEVELLKIE  |
| XP_015974039 | WDQGLLGMCEGEKRLVIPSELGYGERGAPPKIPGGATLVFEVELLKIE  |
| XP_006980788 | WDQGLLGMCEGEKRLVIPSELGYGERGAPPKIPGGATLVFEVELLKIE  |
| XP_015826586 | WDQGLLGMCEGEKRLVIPAELGYGDRGAPPKIPGGATLIFEVELLSIE  |
| XP_015744729 | WDQGLLGMCEGEKRLVIPSELGYGDRGAPPKIPGGATLIFEVELLKIE  |
| XP_015683908 | WDQGLLGMCEGEKRLVIPSELGYGDRGAPPKIPGGATLIFEVELLKIE  |
| XP_007244563 | WDQGLLGMCEGEKRLVIPSELGYGDKGAPPKIPGGATLIFEVELLSIE  |
| XP_006911221 | WDQGLLGMCEGEKRLVIPSELGYGERGAPPKIPGGATLVFEVELLKIE  |
| XP_006771685 | WDQGLLGMCEGEKRLVIPSELGYGERGAPPKIPGGATLVFEVELLKIE  |
| XP_015397493 | WDQGLLGMCEGEKRLVIPSELGYGERGAPPKIPGGATLVFEVELLKIE  |
| XP_015333657 | WDQGLLGMCEGEKRLVIPSELGYGERGAPPKIPGGATLVFEVELLKIE  |
| XP_005577499 | WDQGLLGMCEGEKRLVIPSELGYGERGAPPKIPGGATLVFEVELLKIE  |
| XP_015272310 | WDQGLLGMCEGEKRLVIPSELGYGDRGAPPKIPGGATLIFEVELLKIE  |
| XP_015248799 | WDQGLLGMCEGEKRLVIPAELGYGDRGAPPKIPGGATLIFEVELLSIE  |
| XP_015105405 | WDQGLLGMCEGEKRLVIPSELGYGERGAPPKIPGGATLVFEVELLKIE  |
| XP_014969226 | WDQGLLGMCEGEKRLVIPSELGYGERGAPPKIPGGATLVFEVELLKIE  |
| XP_011957484 | WDQGLLGMCEGEKRLVIPSELGYGERGAPPKIPGGATLVFEVELLKIE  |
| XP_014856097 | WDQGLLGMCEGEKRLVIPAELGYGDRGAPPKIPGGATLIFEVELLSIE  |
| XP_014935343 | WDQGLLGMCEGEKRLVIPSELGYGERGAPPKIPGGATLVFEVELLKIE  |
| XP_014748502 | WDQGLLGMCEGEKRLVIPPELGYGDRGAPPKIPGGAVLIFEVELLKIE  |
| XP_014700413 | WDQGLLGMCEGEKRLVIPSELGYGERGAPPKIPGGATLVFEVELLKIE  |
| XP_006149888 | WDQGLLGMCEGEKRLVIPSELGYGERGAPPKIPGGATLVFEVELLKIE  |
| XP_005864247 | WDQGLLGMCEGEKRLVIPSELGYGERGAPPKIPGGATLVFEVELLKIE  |
| XP_006176941 | WDQGLLGMCEGEKRLVIPSELGYGERGAPPKIPGGATLVFEVELLKIE  |
| XP_006129809 | WDQGLLGMCEGEKRLVIPSELGYGDRGAPPKIPGKATVPPPCLPVACP  |
| XP_006036922 | WDQGLLGMCEGEKRLVIPSELGYGDRGAPPKIPGGATLVFEVELLKIE  |
| XP_005988896 | WDQGLLGMCEGEKRLVIPSELGYGDRGAPPKIPGGATLIFEVELLKIE  |
| XP_005894189 | WDQGLLGMCEGEKRLVIPSELGYGERGAPPKIPGGATLVFEVELLKIE  |
| XP_005808854 | WDQGLLGMCEGEKRLVIPAELGYGDRGAPPKIPGGATLIFEVELLSIE  |
| XP_006106614 | WDQGLLGMCEGEKRLVIPSELGYGERGAPPKIPGGATLVFEVELLKIE  |
| XP_008952214 | WDQGLLGMCEGEKRLVIPSELGYGERGAPPKIPGGATLVFEVELLKIE  |
| XP_013976757 | WDQGLLGMCEGEKRLVIPSELGYGERGAPPKIPGGATLVFEVELLKIE  |
| XP_003828606 | WDQGLLGMCEGEKRLVIPSELGYGERGAPPKIPGGATLVFEVELLKIE  |
| XP_013873214 | WDQGLLGMCEGEKRLVIPSELGYGDRGAPPKIPGGATLIFEVELLSIE  |
| XP_005660807 | WDQGLLGMCEGEKRLVIPSELGYGERGAPPKIPGGATLVFEVELLKIE  |
| XP_005699908 | WDQGLLGMCEGEKRLVIPSELGYGERGAPPKIPGGATLVFEVELLKIE  |
| XP_005736999 | WDQGLLGMCEGEKRLVIPAELGYGDRGAPPKIPGGATLIFEVELLSIE  |
| XP_005384688 | WDQGLLGMCEGEKRLVIPSELGYGERGAPPKIPGGATLVFEVELLKIE  |
| XP_005333562 | WDQGLLGMCEGEKRLVIPSELGYGERGAPPKIPGGATLVFEVELLKIE  |
| XP_003452386 | WDQGLLGMCEGEKRLVIPAELGYGDRGAPPKIPGGATLIFEVELLSIE  |
| XP_005351906 | WDQGLLGMCEGEKRLVIPSELGYGERGAPPKIPGGATLVFEVELLKIE  |
| XP_013006176 | WDQGLLGMCEGEKRLVIPSELGYGERGAPPKIPGGATLVFEVELLKIE  |
| JAI39202     | WDQGLLGMCEGEKRLVIPPELGYGKAGAGDKIPPDATLVFDVELEKID  |
| XP_012975627 | WDQGLLGMCEGEKRLVIPSELGYGERGAPPKIPGGATLVFEVELLKIE  |
| XP_010898827 | WDQGLLGMCEGEKRLVIPSELGYGDRGAPPKIPGGATLIFEVELLNIE  |

|              |                                                   |
|--------------|---------------------------------------------------|
| XP_004852587 | WDQGLLGMCCEGEKRLVIPSELGYGERGAPPKIPGGATLVFEVELLKIE |
| XP_004770232 | WDQGLLGMCCEGEKRLVIPSELGYGERGAPPKIPGGATLVFEVELLKIE |
| XP_012876646 | WDQGLLGMCCEGEKRLVIPSELGYGERGAPPKIPGGATLVFEVELLKIE |
| XP_012816015 | WDQGLLGMCCEGEKRLVIPSELGYGDRGAPPKIPGGATLIFEVELVKIE |
| XP_004656659 | WDQGLLGMCCEGEKRLVIPSELGYGERGAPPKIPGGATLVFEVELLKIE |
| XP_004618432 | WDQGLLGMCCEGEKRLVIPSELGYGERGAPPKIPGGATLVFEVELLKIE |
| XP_012666155 | WDQGLLGMCCEGEKRLVIPSELGYGERGAPPKIPGGATLVFEVELLKIE |
| XP_004596785 | WDQGLLGMCCEGEKRLVIPSELGYGERGAPPKIPGGATLVFEVELLKIE |
| XP_012581059 | WDQGLLGMCCEGEKRLVIPSELGYGERGAPPKIPGGATLVFEVELLKIE |
| XP_012633386 | WDQGLLGMCCEGEKRLVIPSELGYGERGAPPKIPGGATLVFEVELLKIE |
| XP_012520835 | WDQGLLGMCCEGEKRLVIPSELGYGERGAPPKIPGGATLVFEVELLKIE |
| XP_004394068 | WDQGLLGMCCEGEKRLVIPSELGYGERGAPPKIPGGATLVFEVELLKIE |
| XP_012408303 | WDQGLLGMCCEGEKRLVIPSELGYGDRGAPPKIPGRATLVFEVELLKIE |
| XP_004264331 | WDQGLLGMCCEGEKRLVIPSELGYGERGAPPKIPGGATLVFEVELLKIE |
| XP_012351963 | WAQGLLGMCCEGEKRLVIPSELGYGERGAPPKIPGGATLVFEVELLKIE |
| XP_004643825 | WDQGLLGMCCEGEKRLVIPSELGYGERGAPPKIPGGATLVFEVELLKIE |
| XP_004643824 | WDQGLLGMCCEGEKRLVIPSELGYGERGAPPKIPGGATLVFEVELLKIE |
| XP_004479918 | WDQGLLGMCCEGEKRLVIPSELGYGERGAPPKIPGGATLVFEVELLKIE |
| XP_003274202 | WAQGLLGMCCEGEKRLVIPSELGYGERGAPPKIPGGATLVFEVELLKIE |
| XP_004479917 | WDQGLLGMCCEGEKRLVIPSELGYGERGAPPKIPGGATLVFEVELLKIE |
| XP_012318520 | WDQGLLGMCCEGEKRLVIPSELGYGERGAPPKIPGGATLVFEVELLKIE |
| XP_011718910 | WDQGLLGMCCEGEKRLVIPSELGYGERGAPPKIPGGATLVFEVELLKIE |
| XP_011897294 | WDQGLLGMCCEGEKRLVIPSELGYGERGAPPKIPGGATLVFEVELLKIE |
| XP_011848866 | WDQGLLGMCCEGEKRLVIPSELGYGERGAPPKIPGGATLVFEVELLKIE |
| XP_011797983 | WDQGLLGMCCEGEKRLVIPSELGYGERGAPPKIPGGATLVFEVELLKIE |
| XP_003974414 | WDQGLLGMCCEGEKRLVIPADLGYGDRGAPPKIPGGATLIFEVELLSIE |
| XP_004068088 | WDQGLLGMCCEGEKRLVIPAELGYGDRGAPPKIPGGATLIFEVELLSIE |
| XP_011367027 | WDQGLLGMCCEGEKRLVIPSELGYGERGAPPKIPGGATLVFEVELLKIE |
| XP_006937524 | WDQGLLGMCCEGEKRLVIPSELGYGERGAPPKIPGGATLVFEVELLKIE |
| XP_011219931 | WDQGLLGMCCEGEKRLVIPSELGYGERGAPPKIPGGATLVFEVELLKIE |
| XP_010993050 | WDQGLLGMCCEGEKRLVIPSELGYGERGAPPKIPGGATLVFEVELLKIE |
| XP_010836289 | WDQGLLGMCCEGEKRLVIPSELGYGERGAPPKIPGGATLVFEVELLKIE |
| XP_010770745 | WDQGLLGMCCEGEKRLVIPSELGYGDRGAPPKIPGGATLIFEVELLSID |
| XP_010752642 | WDQGLLGMCCEGEKRLVIPAELGYGDRGAPPKIPGGATLIFEVELLSIE |
| XP_010597383 | WDQGLLGMCCEGEKRLVIPSELGYGERGAPPKIPGGATLVFEVELLKIE |
| XP_010634398 | WDQGLLGMCCEGEKRLVIPSELGYGERGAPPKIPGGATLVFEVELLKIE |
| XP_010346544 | WDQGLLGMCCEGEKRLVIPSELGYGERGAPPKIPGGATLVFEVELLKIE |
| XP_010375362 | WDQGLLGMCCEGEKRLVIPSELGYGERGAPPKIPGGATLVFEVELLKIE |
| XP_010375348 | WDQGLLGMCCEGEKRLVIPSELGYGERGAPPKIPGGATLVFEVELLKIE |
| XP_009421628 | WDQGLLGMCCEGEKRLVIPSELGYGERGAPPKIPGGATLVFEVELLKIE |
| XP_009244471 | WDQGLLGMCCEGEKRLVIPSELGYGERGAPPKIPGGATLVFEVELLKIE |
| XP_003909669 | WDQGLLGMCCEGEKRLVIPSELGYGERGAPPKIPGGATLVFEVELLKIE |
| XP_008837174 | WDQGLLGMCCEGEKRLVIPSELGYGERGAPPKIPGGATLVFEVELLKIE |
| XP_008707188 | WDQGLLGMCCEGEKRLVIPSELGYGERGAPPKIPGGATLVFEVELLKIE |
| XP_008565641 | WDQGLLGMCCEGEKRLVIPSELGYGERGAPPKIPGGATLVFEVELLKIE |
| XP_008304826 | WDQGLLGMCCEGEKRLVIPAELGYGDRGAPPKIPGGATLIFEVELLSIE |
| XP_008255497 | WDQGLLGMCCEGEKRLVIPSELGYGERGAPPKIPGGAALVFQVELLKVE |
| XP_005305586 | WDQGLLGMCCEGEKRLVIPSELGYGDRGAPPKIPGGATLIFEVELLKIE |
| XP_008047615 | WDQGLLGMCCEGEKRLVIPSELGYGERGAPPKIPGGATLVFEVELLKIE |
| XP_007992347 | WDQGLLGMCCEGEKRLVIPSELGYGERGAPPKIPGGATLVFEVELLKIE |
| XP_007943021 | WDQGLLGMCCEGEKRLVIPSELGYGERGAPPKIPGGATLVFEVELLKIE |
| XP_007608803 | WDQGLLGMCCEGEKRLVIPSELGYGERGAPPKIPGGATLVFEVELLKIE |
| JAC52726     | WDQGLLGMCCEGEKRLVIPPELGYGKAGAGDKIPPDATLVFDVELEKID |
| XP_007462141 | WDQGLLGMCCEGEKRLVIPSELGYGERGAPPKIPGGATLVFEVELLKIE |
| XP_007174388 | WDQGLLGMCCEGEKRLVIPSELGYGERGAPPKIPGGATLVFEVELLKIE |
| XP_006050940 | WDQGLLGMCCEGEKRLVIPSELGYGERGAPPKIPGGATLVFEVELLKIE |
| XP_007070374 | WDQGLLGMCCEGEKRLVIPSELGYGDRGAPPKIPGGATLIFEVELLKIE |
| XP_007102658 | WDQGLLGMCCEGEKRLVIPSELGYGERGAPPKIPGGATLVFEVELLKIE |
| XP_006901562 | WDQGLLGMCCEGEKRLVIPSELGYGDRGAPPKIPGGATLVFEVELLKIE |
| XP_006746300 | WDQGLLGMCCEGEKRLVIPSELGYGERGAPPKIPGGATLVFEVELLKIE |

|              |                                                     |
|--------------|-----------------------------------------------------|
| JAC05186     | WEQGLLGMCCEGEKRRRLVIPPELGYGKSGAGDKIPPDATLVFEVECEKID |
| XP_005983463 | WDQGLLGMCCEGEKRRKLVIPSELGYGERGAPPKIPGGATLVFEVELLKIE |
| JAB39795     | WDQGLLGMCCEGEKRRKLVIPPELGYGDRGAPPKIPGGATLVFEVELLKIE |
| XP_004051480 | WDQGLLGMCCEGEKRRKLVIPSELGYGERGAPPKIPGGATLVFEVELLKIE |
| AEJ84311     | WAPGLLGMCCEGEKRRKLVIPSELGSGERGAPPKIPGGATLVFEVELLKIE |
| Q54SR7       | WDQGVLMGMCVGEKRRKLIIPPSLGYGQQGAGDKIPGNSHLIFDVELIGIN |
| XP_014452900 | WDQGLLGMCCEGEKRRKLVIPSELGYGDRAPCP-----LQVVQRWCS     |
| XP_014354594 | WDQGLIGMCCEGEQRKLVIPPELAYGENGSPPKIPKSATLTFHVDLVKIE  |
| JAN41653     | WDQGLMGMCEGEKRRKLVIPSELGYGASGAPPKIPGDATLIFNVVELLKIE |
| XP_014287548 | WDQGLMGMCEGEIRKLVIPPDLYGKAGAPPKIPGGAVLTFDVELVKIE    |
| XP_014211126 | WEQGLIGMCVGEKRRKLVIPPDLYGSFGALPKIPP NATVIFTVELVKLV  |
| XP_014090010 | WDQGLLGMCCEGEKRRLVIPPELGYGKAGAGDKIPPDSTLVFDVELERID  |
| XP_013186102 | WDQGLIGMCCEGEQRKLVIPPELAYGEAGAPPKIPKSATLTFHVDLVKID  |
| XP_004383846 | WDQGLLGMCCEGEKRRKLVIPSELGYGERGAPPKIPGGATLVFEVELLKIE |
| XP_004931279 | WDQGLLGMCCEGEQRKLVIPPELAYGSAGAPPKIPKSATLTFHVELVKIE  |
| XP_012254607 | WEQGLMGMCEGEKRRKLVIPSDLAYGSPGALPKVPPDATVIFMVELVKLV  |
| XP_004536978 | WEQGLLGMCCEGEKRRLVIPPELGYGKSGAGDKIPPDATLVFEVECEKID  |
| XP_785999    | WDQGLLMCEGEKRRKLVIPSNLGYGDRGSPPKIPGGATLIFEVELIKIN   |
| XP_011560028 | WEQGLMGMCMGEQRKLVIPPELGYGQEGSPPKIPKSAILIFHVELVKIE   |
| XP_011211190 | WDQGLLGMCCEGEKRRLVIPPELGYGKAGAGDKIPPDATLVFDVELEKID  |
| KFO28453     | WDQGLLGMCCEGEKRRKLVIPSELGYGERGAPPKIPGGATLVFEVELLKIE |
| XP_001600159 | WEQGLMGMCVGEKRRKLVIPPDLYGSFGALPKIPP NSTVIFTVELVQLV  |
| JAB53650     | WEQGLLGMCCEGEKRRKLVIPSELGYGDRGAPPKIPGGATLIFEVELLKIE |
| KTG33021     | WDQGLLGMCCEGEKRRKLVIPSELGYGDRGAPPKIPGGATLIFEVELLSIE |
| JAI11984     | WDQGLLGMCCEGEKRRKLVIPSELGYGDRGAPPKIPGGATLIFEVELLKIE |
| JAA96089     | WDQGLLGMCCEGEKRRKLVIPSELGYGDRGAPPKIPGGATLIFEVELLKIE |
|              | * *: **. ** *: * **.*. * .                          |

Figure S2A

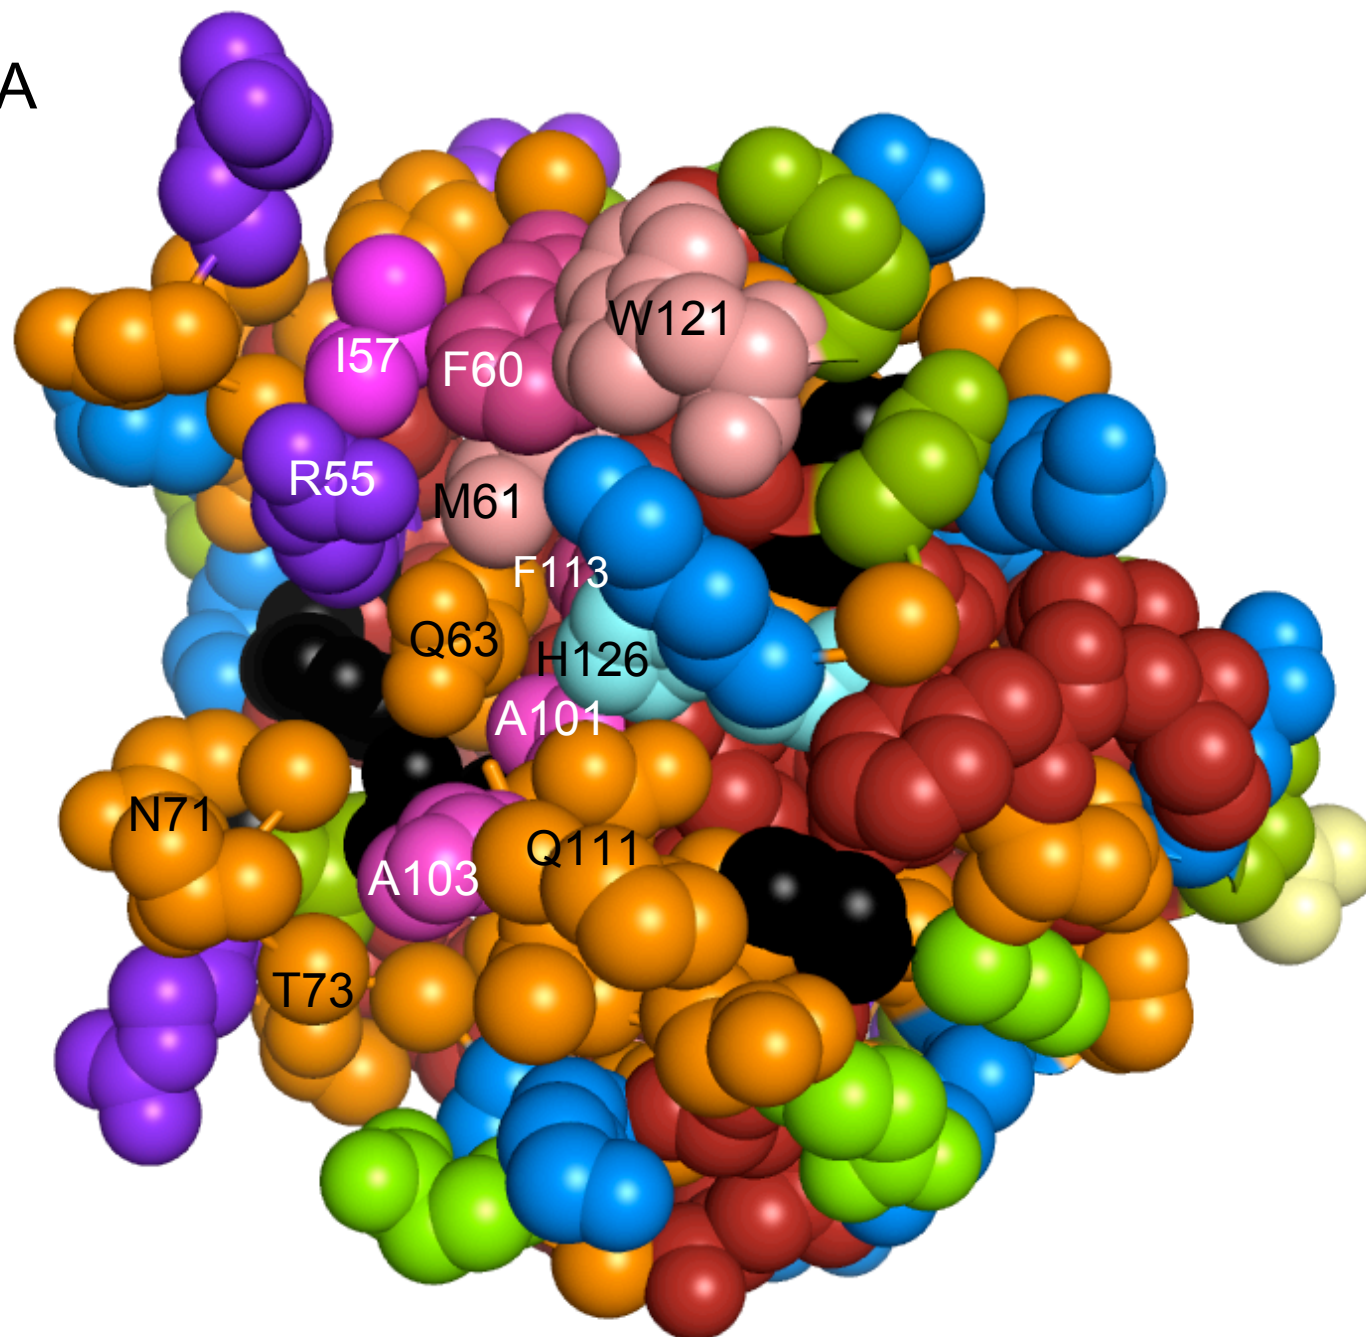

S2B

PPlase cavity

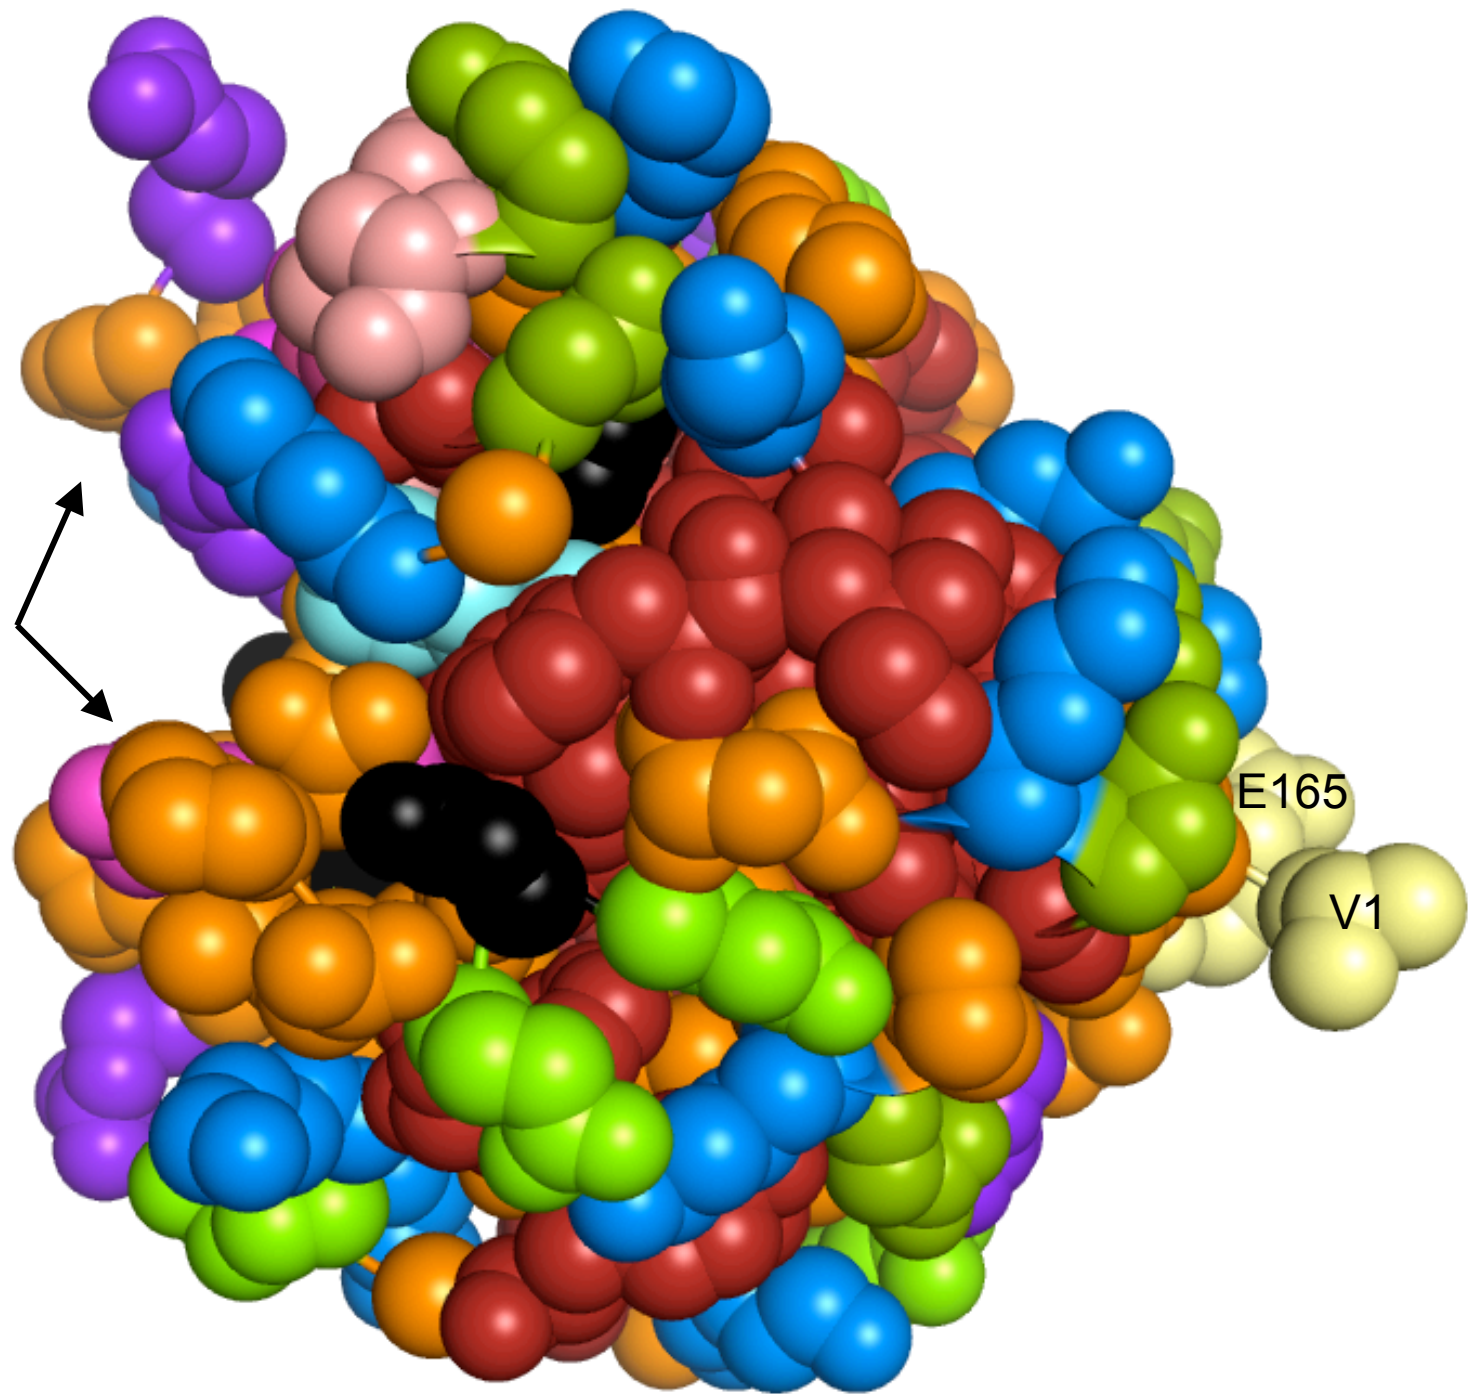



S2C

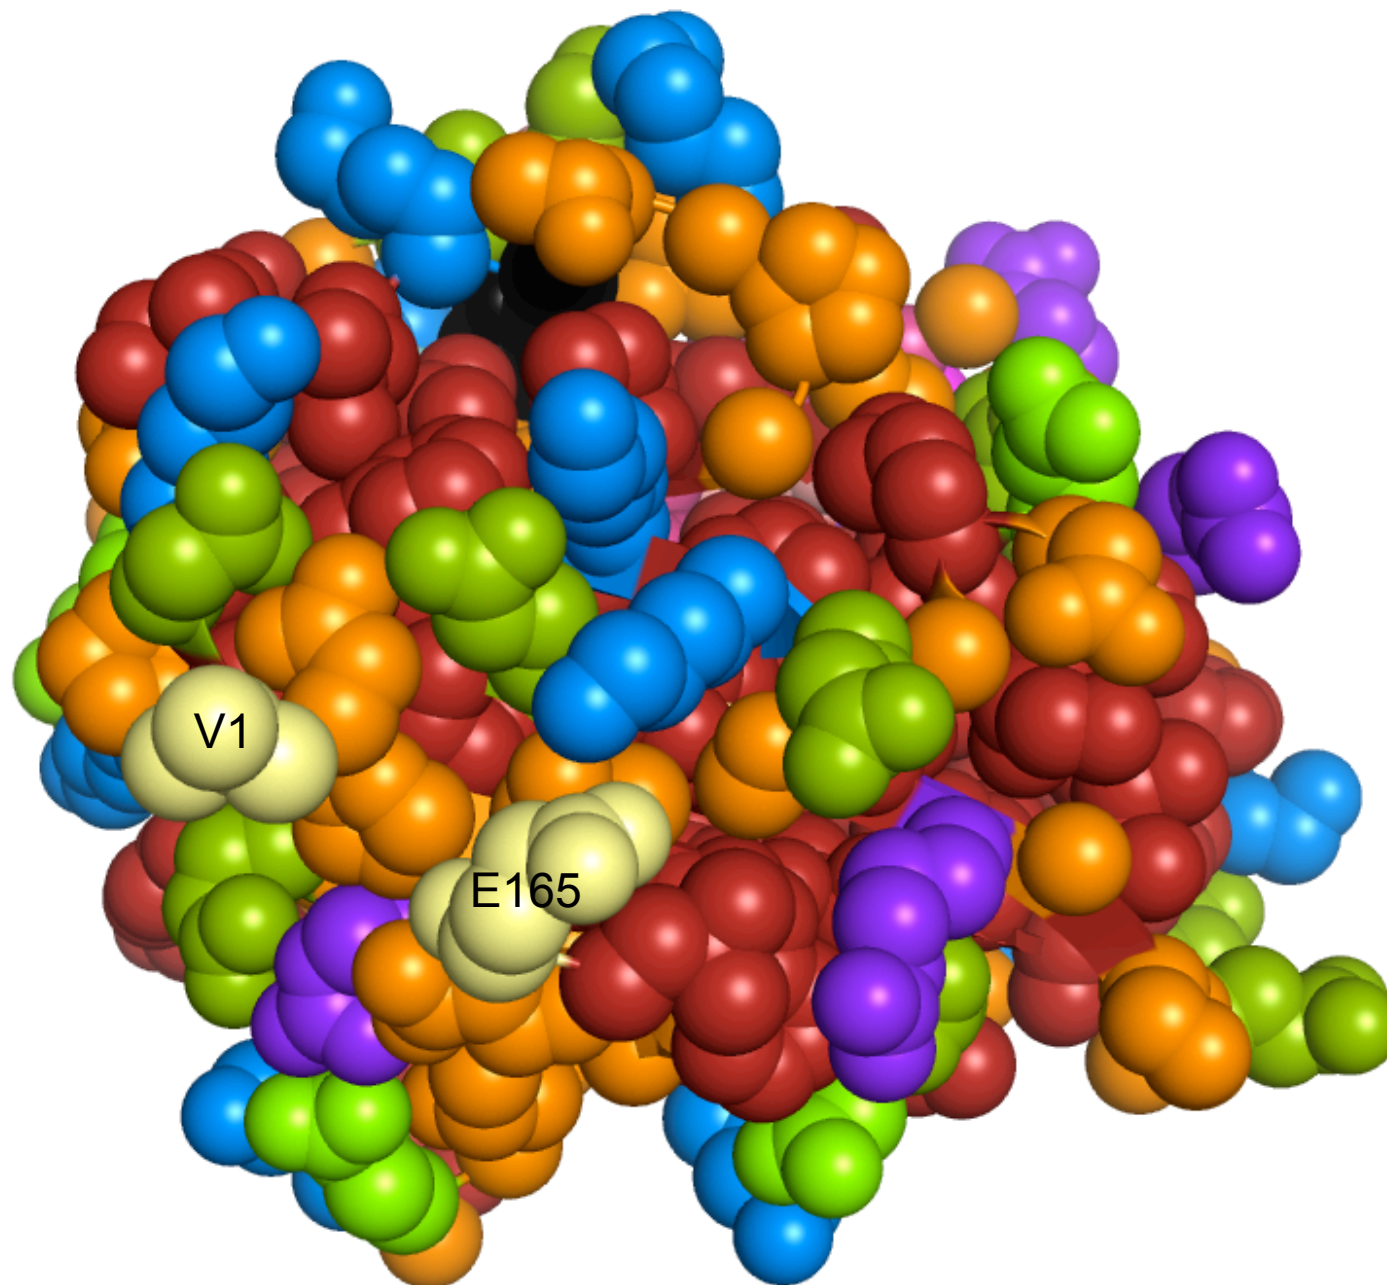

Figure S3. Alignment of nine fragments of sequences of mTOR from different species (see Fig. S3A)

```

NP_004949      -YTPPAVQGFFRSISLSRGNNLQDTLRVLTWLFYDGHWPDVNEALVEGVKAIQIDTWLQV
NP_064393      -YTPPAVQGFFRSISLSRGNNLQDTLRVLTWLFYDGHWPDVNEALVEGVKAIQIDTWLQV
NP_063971      -YTPPAVQGFFRSISLSRGNNLQDTLRVLTWLFYDGHWPDVNEALVEGVKAIQIDTWLQV
NP_001138927   MYTPPAVQGFFRSISLSRGNNLQDTLRVLTWLFYDGHWPDVNEALVEGVKAIQIDTWLQV
NP_001272677   -YTPPAVQGFFRSISLSRGNNLQDTLRVLTWLFYDGHWPDVNEALVEGVKAIQIDTWLQV
NP_001260427   ----PAVQGFFRSISLIKGNLQDTLRLTLWLFYDGNHAEVYEALLSGMKLIEINTWLQV
NP_524891      RYAVPAVQGFFRSISLIKGNLQDTLRLTLWLFYDGNHAEVYEALLSGMKLIEINTWLQV
AJV38810       ----PAIKGFFHSISLLETSCLDTLRLTLWLFNFGGIKEVSQAMYEGFNLMKIENWLEV
AJS55673       -HVIPAIKGFFHSISLSESSSLQDALRLTLWFTFGGIPEATQAMHEGFNLIQIGTWLEV
                *: :*: :*: . . *: :*: :* * :* :. :*: .*: :*: :*: :*:

```

```

NP_004949      IPQLIARIDTPRPLVGRLIHQLLTDIGRYHPQALIYPLTVASKSTTTARHNAANKILKNM
NP_064393      IPQLIARIDTPRPLVGRLIHQLLTDIGRYHPQALIYPLTVASKSTTTARHNAANKILKNM
NP_063971      IPQLIARIDTPRPLVGRLIHQLLTDIGRYHPQALIYPLTVASKSTTTARHNAANKILKNM
NP_001138927   IPQLIARIDTPRPLVGRLIHQLLTDIGRYHPQALIYPLTVASKSTTTARHNAANKILKNM
NP_001272677   IPQLIARIDTPRPLVGRLIHQLLTDIGRYHPQALIYPLTVASKSTTTARHNAANKILKNM
NP_001260427   IPQLIARIDTHRQLVGQLIHQLLMDIGKNHPQALVYPLTVASKSASLARRNAAFKILDSM
NP_524891      IPQLIARIDTHRQLVGQLIHQLLMDIGKNHPQALVYPLTVASKSASLARRNAAFKILDSM
AJV38810       LPQLISRIHQPDPTVSNLLSLLSDLGKAHPQALVYPLTVAIKSESVSRQKAALSIEKI
AJS55673       LPQLISRIHQPNQIVSRLLSLLSDLGKAHPQALVYPLMVAIKSESLSRQKAALSIEKM
                :*: :*. . . : .** *: :*: :*: :* * * : :*: :* .*: :*:

```

### Rapamycin binding domain

```

NP_004949      CEHSNTLVQQAMMVSEELIRVAILWHEMWHEGLEEASRLYFGERNVKGMFEVLEPLHAMM
NP_064393      CEHSNTLVQQAMMVSEELIRVAILWHEMWHEGLEEASRLYFGERNVKGMFEVLEPLHAMM
NP_063971      CEHSNTLVQQAMMVSEELIRVAILWHEMWHEGLEEASRLYFGERNVKGMFEVLEPLHAMM
NP_001138927   CEHSNTLVQQAMMVSEELIRVAILWHEMWHEGLEEASRLYFGERNVKGMFEVLEPLHAMM
NP_001272677   CEHSNTLVQQAMMVSEELIRVAILWHEMWHEGLEEASRLYFGERNVKGMFEVLEPLHAMM
NP_001260427   RKHSPTLVEQAVMCSEELIRVAILWHEQWHEGLEEASRLYFGDRNVKGMFEILEPLHAML
NP_524891      RKHSPTLVEQAVMCSEELIRVAILWHEQWHEGLEEASRLYFGDRNVKGMFEILEPLHAML
AJV38810       RIHSPVLVNQAEVLVSHELIRVAVLWHELWYEGLEDASRQFFVEHNIEKMFSTLEPLHKHL
AJS55673       RIHSPVLVDQAEVLVSHELIRMAVLWHEQWYEGLEDASRQFFGEHNTEKMFAALEPLYEML
                ** .*: :*: :* .*: :*: :*: :*: :* :* :* :* :* :* :* :* :* :* :*

```

```

NP_004949      ERGPQTLKETSFNQAYGRDLMEAQEWCRKYMKSGNVKDLTQAWDLYYHVFRISKQLPQL
NP_064393      ERGPQTLKETSFNQAYGRDLMEAQEWCRKYMKSGNVKDLTQAWDLYYHVFRISKQLPQL
NP_063971      ERGPQTLKETSFNQAYGRDLMEAQEWCRKYMKSGNVKDLTQAWDLYYHVFRISKQLPQL
NP_001138927   ERGPQTLKETSFNQAYGRDLMEAQEWCRKYMKSGNVKDLTQAWDLYYHVFRISKQLPQL
NP_001272677   ERGPQTLKETSFNQAYGRDLMEAQEWCRKYMKSGNVKDLTQAWDLYYHVFRISKQLPQL
NP_001260427   ERGPQTLKETSFSQAYGRELTEAYEWSQRYKTSAVVMDLDRAWDIYYHVFKISRQLPQL
NP_524891      ERGPQTLKETSFSQAYGRELTEAYEWSQRYKTSAVVMDLDRAWDIYYHVFKISRQLPQL
AJV38810       GNEPQTLSEVSFQKSFGRDLNDAYEWLNNYKKSDDINNLDQAWDIYNNVFRKITRQIPQL
AJS55673       KRGPETLREISFQNSFGRDLNDAYEWLNNYKKSDDVSNLDQAWDIYNNVFRKITGKQLPQL
                . *: :* * *: :*: :*: :* * * .* .* : :* :*: :*: :* :* :* :*

```

### PI3-Kinase

```

NP_004949      TSLELQYVSPKLLMCRDLELAVPGTYDPN-QPIIRIQSIAPSLQVITSKQRPRLTLMGS
NP_064393      TSLELQYVSPKLLMCRDLELAVPGTYDPN-QPIIRIQSIAPSLQVITSKQRPRLTLMGS
NP_063971      TSLELQYVSPKLLMCRDLELAVPGTYDPN-QPIIRIQSIAPSLQVITSKQRPRLTLMGS
NP_001138927   TSLELQYVSPKLLMCRDLELAVPGTYDPN-QPIIRIQSIAPSLQVITSKQRPRLTLMGS
NP_001272677   TSLELQYVSPKLLMCRDLELAVPGTYDPN-QPIIRIQSIAPSLQVITSKQRPRLTLMGS
NP_001260427   TSLELPYVSPKLMTCKDLELAVPGSYNPG-QELIRISIIKTNLQVITSKQRPRLCIRGS
NP_524891      TSLELPYVSPKLMTCKDLELAVPGSYNPG-QELIRISIIKTNLQVITSKQRPRLCIRGS
AJV38810       QTLDLQHVSPQLLATHDLELAVPGTYFPG-KPTIRIVKFEPFLFSVSSKQRPRLKSIKGS
AJS55673       QTLELQHVSPKLLSAHDLELAVPGTRASGKPIVKISKFEPVFSVSSKQRPRLKFCIKGS
                :*: :*: :* :* :* :* :* :* :* :* :* :* :* :* :* :* :* :*

```



```

NP_004949      NGHEFVFLLLKGHEDLRQDERVMQLFGLVNTLLANDPTSLRKNLSIQRYAVIPLSTNSGLI
NP_064393      NGHEFVFLLLKGHEDLRQDERVMQLFGLVNTLLANDPTSLRKNLSIQRYAVIPLSTNSGLI
NP_063971      NGHEFVFLLLKGHEDLRQDERVMQLFGLVNTLLANDPTSLRKNLSIQRYAVIPLSTNSGLI
NP_001138927   NGHEFVFLLLKGHEDLRQDERVMQLFGLVNTLLANDPTSLRKNLSIQRYAVIPLSTNSGLI
NP_001272677   NGHEFVFLLLKGHEDLRQDERVMQLFGLVNTLLANDPTSLRKNLSIQRYAVIPLSTNSGLI
NP_001260427   NGKDYMYLLKGHEDLRQDERVMQLFSLVNTLLDDPDTFRRLAIQRYAVIPLSTNSGLI
NP_524891      NGKDYMYLLKGHEDLRQDERVMQLFSLVNTLLDDPDTFRRLAIQRYAVIPLSTNSGLI
AJV38810      DGKDYKYVLKGHEDIRQDSLVMQLFGLVNTLLKNDSECFKRHLDIQQYPAIPLSPKSGLL
AJS55673      DGKDYKYVLKGHEDIRQDSLVMQLFGLVNTLLQNDACFRRHLDIQQYPAIPLSPKSGLL
: * : : :  : : * : : : : * : : .  * : : : . * : : : :  : * .  : : : : * * : * . * : : : . * : : :

```

```

NP_004949      GWVPHCDTLHALIRDYREKKKILLNIEHRIMLRMAPDYDHLTLMQKVEVFEHAVNNTAGD
NP_064393      GWVPHCDTLHALIRDYREKKKILLNIEHRIMLRMAPDYDHLTLMQKVEVFEHAVNNTAGD
NP_063971      GWVPHCDTLHALIRDYREKKKILLNIEHRIMLRMAPDYDHLTLMQKVEVFEHAVNNTAGD
NP_001138927   GWVPHCDTLHALIRDYREKKKILLNIEHRIMLRMAPDYDHLTLMQKVEVFEHAVNNTAGD
NP_001272677   GWVPHCDTLHALIRDYREKKKILLNIEHRIMLRMAPDYDHLTLMQKVEVFEHAVNNTAGD
NP_001260427   GWVPHCDTLHTLIRDYRDKKKVPLNQEHRTMLNFAPDYDHLTLMQKVEVFEHALGQTQGD
NP_524891      GWVPHCDTLHTLIRDYRDKKKVPLNQEHRTMLNFAPDYDHLTLMQKVEVFEHALGQTQGD
AJV38810      GWVPNSDTFHVLIREHRAKKIPLNIEHWVMLQMAPDYENLTLQKIEVFTYALDNTKGQ
AJS55673      GWVPNSDTFHVLIREHRAKKIPLNIEHWVMLQMAPDYDNLTLQKVEVFTYALNNTGQ
****:.**:.***::: **: ** **  **.:*****:*****:*** :*.:* *

```

|              |                                                               |
|--------------|---------------------------------------------------------------|
| NP_004949    | DLAKLLWLKSPSSEVWFDRRTNYTRSLAVMSMVGYILGLGDRHPSNLMMLDRLSGKILHID |
| NP_064393    | DLAKLLWLKSPSSEVWFDRRTNYTRSLAVMSMVGYILGLGDRHPSNLMMLDRLSGKILHID |
| NP_063971    | DLAKLLWLKSPSSEVWFDRRTNYTRSLAVMSMVGYILGLGDRHPSNLMMLDRLSGKILHID |
| NP_001138927 | DLAKLLWLKSPSSEVWFDRRTNYTRSLAVMSMVGYILGLGDRHPSNLMMLDRLSGKILHID |
| NP_001272677 | DLAKLLWLKSPSSEVWFDRRTNYTRSLAVMSMVGYILGLGDRHPSNLMMLDRLSGKILHID |
| NP_001260427 | DLAKLLWLKSPSSELWFERRNNYTRSLAVMSMVGYILGLGDRHPSNLMMLDRMSGKILHID |
| NP_524891    | DLAKLLWLKSPSSELWFERRNNYTRSLAVMSMVGYILGLGDRHPSNLMMLDRMSGKILHID |
| AJV38810     | DLYKILWLKSRSETWLERRTTYTRSLAVMSMTGYILGLGDRHPSNLMMLDRITGKVIHID  |
| AJS55673     | DLYKVLWLKSRSSETWLERRTTYTRSLAVMSMTGYILGLGDRHPSNLMMLDRITGKVIHID |
|              | ** *:***** ** *:***.*****.*****:::***                         |

```

NP_004949      FGDCFEVAMTREKFPEKIPFRLTRMLTNAMEVETGLDGNYRITCHTVMEVLREHKDSVMAY
NP_064393      FGDCFEVAMTREKFPEKIPFRLTRMLTNAMEVETGLDGNYRTTCHTVMEVLREHKDSVMAY
NP_063971      FGDCFEVAMTREKFPEKIPFRLTRMLTNAMEVETGLDGNYRTTCHTVMEVLREHKDSVMAY
NP_001138927   FGDCFEVAMTREKFPEKIPFRLTRMLTNAMEVETGLDGNYRITCHTVMEVLREHKDSVMAY
NP_001272677   FGDCFEVAMTREKFPEKIPFRLTRMLTNAMEVETGLDGNYRITCHTVMEVLREHKDSVMAY
NP_001260427   FGDCFEVAMTREKFPEKIPFRLTRMLIKAMEVTGIEGTYRRTCESVMLVLRNKDSLMAV
NP_524891      FGDCFEVAMTREKFPEKIPFRLTRMLIKAMEVTGIEGTYRRTCESVMLVLRNKDSLMAV
AJV38810       FGDCFEAAILREKYPEKVPFRLTRMLTYAMEVSGIEGSFRITCENVMRKVLRDNKESLMAI
AJS55673       FGDCFEAAILREKFPEKVPFRLTRMLTYAMEVSGIEGSFRITCENVMRKVLRDNKESLMAI
*****.*: ***:***:***** *****:::.*:***.* ** *:***:

```

```

NP_004949      LEAFVYDPLLNWRLMDTNTKGN-----KRSRTRT
NP_064393      LEAFVYDPLLNWRLMDTNTKGN-----KRSRTRT
NP_063971      LEAFVYDPLLNWRLMDTNAKGN-----KRSRTRT
NP_001138927   LEAFVYDPLLNWRLMDTNTKGN-----KRSRTRT
NP_001272677   LEAFVYDPLLNWRLMDTNTKGN-----KRSRTRT
NP_001260427   LEAFVYDPLLNWRLLDVDDKKGNDAVAGAGAPGGRGGSGMQDSLNSNSVEDSLPMAKSKPYD
NP_524891      LEAFVYDPLLNWRLLDVDDKKGNDAVAGAGAPGGRGGSGMQDSLNSNSVEDSLPMAKSKPYD
AJV38810       LEAFALDPLIHWG-FDLP-----PQK
AJS55673       LEAFAFDPLINWG-FDLP-----TKK
                ****.  ***::*  :*

```

```

NP_004949      DSYSAG-----QSVEILDGVELGEPAHKKKTG-
NP_064393      DSYSAG-----QSVEILDGVELGEPAHKKAG-
NP_063971      DSYSAG-----QSVEILDGVELGEPAHKKKTG-
NP_001138927   DSYSAG-----QSVEILDGVELGEPAHKKKTG-
NP_001272677   DSYSAG-----QSVEILDGVELGEPAHKKKTG-
NP_001260427   PTLQQGGLHNNVADETNSKASQVIKRVKCKLTGTDFTQTEKSVNEQSQVELLIQQATNNEN
NP_524891      PTLQQGGLHNNVADETNSKASQVIKRVKCKLTGTDFTQTEKSVNEQSQVELLIQQATNNEN
AJV38810       LTEQTG-----IPLPLINPSELLRKG-----
AJS55673       IEEETG-----IQLPVMNANELLSNG-----
      . *                               : . **

```

### *FATC domain*

```

NP_004949      -----TTVPESIHSFIGDGLVKPEALNKKAIQIINRVRDKLTGRDFSHDDTLD
NP_064393      -----TTVPESIHSFIGDGLVKPEALNKKAIQIINRVRDKLTGRDFSHDDTLD
NP_063971      -----TTVPESIHSFIGDGLVKPEALNKKAIQIINRVRDKLTGRDFSHDDTLD
NP_001138927   -----TTVPESIHSFIGYGLVKPEALNKKAIQIINRVRDKLTGRDFSHDETLD
NP_001272677   -----TTVPESIHSFIGDGLVKPEALNKKAIQIINRVRDKLTGRDFSHDETLD
NP_001260427   LCQCYIGWCPFWTTVPESIHSFIGDGLVKPEALNKKAIQIINRVRDKLTGRDFSHDETLD
NP_524891      LCQCYIGWCPFWTTVPESIHSFIGDGLVKPEALNKKAIQIINRVRDKLTGRDFSHDETLD
AJV38810       -----AITVEEAANMEAE--QONETRNARAMLVLRRTDKLTGNDIKRFNELD
AJS55673       -----AITEEEVQRVENE--HKNAIRNARAMLVLRITDKLTGNDIRRFNDLD
      : . *. . : * **: :. *: *****. : : **

```

```

NP_004949      VPTQVELLIKQATSHENLCQCYIGWCPFW
NP_064393      VPTQVELLIKQATSHENLCQCYIGWCPFW
NP_063971      VPTQVELLIKQATSHENLCQCYIGWCPFW
NP_001138927   VPTQVELLIKQATSHENLCQCYIGWCPFW
NP_001272677   VPTQVELLIKQATSHENLCQCYLGWCPFW
NP_001260427   VPTQVELLIKQATSHENLCQCYLGWCPFW
NP_524891      VPTQVELLIKQATSHENLCQCYLGWCPFW
AJV38810       VPEQVDKLIQQATSIERLCQHYIGWCPFW
AJS55673       VPEQVDKLIQQATSVENLCQHYIGW----
      ** **: **:***** *.*** *:**

```

Attention: RBD was indicated in deep yellow and in red vertical brackets; amino acid residues having contact ( $d \leq 4.5 \text{ \AA}$ ) with rapamycin are in red whereas those that contact hFKBP12a are in rose; sequences of these two segments are in black and were placed between green parantheses.

Figure S3A. Sequence attributes of fragments of sequences homologous to human mTOR (Figure S3).

```
-----
1 NP_004949      2549AAs |1880-2549/Alg = 670AA || pI 7.8 ( 6.7) || HI 40.9 ( 43.2) || Mass kDa 76.9 ( 288.9) ||
> serine/threonine-protein kinase mTOR [Homo sapiens].
-----
2 NP_064393      2549AAs |1880-2549/Alg = 670AA || pI 7.8 ( 6.7) || HI 40.6 ( 43.4) || Mass kDa 76.9 ( 288.8) ||
> serine/threonine-protein kinase mTOR [Mus musculus].
-----
3 NP_063971      2549AAs |1880-2549/Alg = 670AA || pI 7.8 ( 6.7) || HI 40.6 ( 43.2) || Mass kDa 76.9 ( 288.8) ||
> serine/threonine-protein kinase mTOR [Rattus norvegicus].
-----
4 NP_001138927  2550AAs |1880-2550/Alg = 671AA || pI 8.0 ( 6.8) || HI 41.3 ( 43.5) || Mass kDa 77.1 ( 289.0) ||
> serine/threonine-protein kinase mTOR [Ovis aries].
-----
5 NP_001272677  2549AAs |1880-2549/Alg = 670AA || pI 7.8 ( 6.8) || HI 40.9 ( 43.1) || Mass kDa 76.9 ( 288.6) ||
> serine/threonine-protein kinase mTOR [Capra hircus].
-----
6 NP_001260427  2471AAs |1805-2549/Alg = 745AA || pI 7.3 ( 6.5) || HI 37.7 ( 41.4) || Mass kDa 85.1 ( 281.2) ||
> target of rapamycin, isoform B [Drosophila melanogaster].
-----
7 NP_524891      2470AAs |1800-2549/Alg = 750AA || pI 7.5 ( 6.5) || HI 37.9 ( 41.5) || Mass kDa 85.7 ( 281.0) ||
> target of rapamycin, isoform A [Drosophila melanogaster].
-----
8 AJV38810       2470AAs |1820-2470/Alg = 651AA || pI 6.8 ( 6.9) || HI 41.9 ( 44.5) || Mass kDa 75.0 ( 281.1) ||
> Tor1p [Saccharomyces cerevisiae YJM1273].
-----
9 AJS55673       2474AAs |1820-2470/Alg = 651AA || pI 6.5 ( 7.1) || HI 42.1 ( 44.7) || Mass kDa 74.7 ( 281.6) ||
> Tor2p [Saccharomyces cerevisiae YJM1549].
-----
```

Figure S4. Alignment of human sequences of ATR/ATM/mTOR  
(ATM=Telomere-length maintenance)

```

NP_001175      -----MGEHGLEELASMPALRELGSATPEEYNTVVQKPRQILCQFI
NP_000042      MSLVLNDLLICCRQLEHDRATERKKKEVEKFKRLIRDPETIKHLDRHSDSKQGKYLNWDAV
NP_004949      -----MLGTGPAAATTAATTSSNVSVLQQFASGLK
                                : . : . :

NP_001175      DRILTDVNVVAVELVKKTDTSQPTSVMLLDIFIQHIMKSS--PLMFVNVSGSHEAKGSCIEF
NP_000042      FRFLQKYIQKETECRLIAKPNVSASTQASRQKKMQEISSLVKYFIKCANRRAPRLKCQEL
NP_004949      SRNEETRAKAAKELQHYVTMELREMSQEESTRFYDQLNHHIFELVSSSDANERKGGILAI
                *      * : . : . : : : : : : : :

NP_001175      SNWIITRLLR-----IAATPSCHLLHKKICEVICSLFLFKSKSPAIFGVLTKEELLQLF
NP_000042      LNYIMDTVKDSSNGAIYGADCSNILLKDILSVRKYWCEISQQQWLELFSVYFRLYLKPSQ
NP_004949      ASLIGVEGGN-----ATRIGRFANYLRNLLPSND
                . *                                * . : * :

NP_001175      DLVYLHRRNVMGHAVEWPVVMRS-FLSQLDEHMGYLQSAPLQMLSMQNLFIETLLMVL
NP_000042      DVHRVLVARIIHAVTKGCCQTDGLNSKFLDFFSKAIQCARQEKSSSGLNHILAALTIFL
NP_004949      PVVMEMASKAIG----RLAMAGDTFTAIEYVEFEVKRALEWLGADRNEGRRHAAVLVREL
                : . : : : : : : : : : : *

NP_001175      TRIIAIVFFRRQELLLWQIGCVLLEYGSPKIKSLAISFLTELFQLGGLPAQP-----
NP_000042      KTLAVNFRIRVCELGDEILPTLLYIWTQHRNLDSLKEVIEELFQLQIYIHHPKGAKTQEK
NP_004949      AISVPTFFFQVQPFDFNIFVAVWDPKQAIREGAVAALRACLILTTQREPKE-----
                . : : : : : . : . * : :

NP_001175      -----ASTFFSSFLELLKHLVEMD
NP_000042      GAYESTKWRASILYNLYDLLVNEISHIGSRGKYSSGFRNIAVKENLIELMADICHQVFNE
NP_004949      -----MQKPQWYRHTFEEAEKGDFET
                                : . : .

NP_001175      TDQLKLYEEPLSKLIKT-----LFPFEAEAYRNIEPVYLNMLEKLCVMFEDGVL
NP_000042      TRSLEISQSYTTTQRESSDYSVPCKRKKIELGWEVIKDHLQKSQNDFDLVPWLQIATQLI
NP_004949      LAKEKGMNRDD--RIHG-----ALLILNELVRISMEGERLREEMEEITQQQLVH
                . : : . : : * : . : :

NP_001175      MRLKSDLLKAALCHLLQYFLKFVPAG-----YESALQV
NP_000042      SKYPASLPNCELSPLLMILSOLLPOQRHGERTPYVLRCLTEVALCQDKRSNLESSQKSDL
NP_004949      DKYCKDLMGFGTKPRHITPFTSFQAVQ-----PQQSNAL
                : . * . . :

NP_001175      RKVYVRNICKALLDVLGIEVDAEYLLGPLYAALKMESMEIEEIQCQTQQENLSSNSDGI
NP_000042      LKLWNKIWCITFRGISSEIQIAEN-FGLLGAIIQGSLVEVDREFWKLFTGSACRPSPCAV
NP_004949      VGLLGYSSHQGLMGFGTSPSPAKSTLVESRCCRDLMEEKFDQVCQWVLKCRNSKNSLIQM
                : : . * : . . : . :

NP_001175      SPKRRRLSSSLNPSKRAP----KQTEEIKHVDNMQKSILWSALKQKAESLQISLEYSGLK
NP_000042      CCLTLALTTSIVPGTVKMGIEQNMCEVNRFSFLKESIMKWLLFYQLEGDLENSTVEP---
NP_004949      TILNLLPRLAAFRPSAFTDTQYQLQDTMNHVLSVCVKKKEKERTAAFQALGLLSVAVRSEFK-
                : . : . : . * * . :

NP_001175      NPVIEMLEGIAVVLQLTALCTVHCSHQNMNCRTFKDCQHKSKKKP-----SVVIT
NP_000042      PILHSNFPHLVLEKILVSLTMKNCKAAMNFFQSVPECEHHQKDEELSFSEVEELFLQTT
NP_004949      VYLPRVLDIIRAALPPKDFAHKRQKAMQVDATVFTCISMLARAMG-----PGIQ
                : : : : . . . :

NP_001175      WMSLDFYTKVLKS---CRSLLESVQKLDLEATIDKVVKIYDALIYMQVNSSFEDHILED
NP_000042      FDKMDFLTIVRECGIEKHQSSIGFSVHQNLKESLDRCLLGLSEQLLNNYSSEITNSETLV
NP_004949      QDIKELLEPMPLAVG---LSPALTAVLYDLSRQIPQLKKDIQDGLLKMLSLVLMHKPLRH
                : : : * : : : . : .

```

NP\_001175 LCGMLSLPWIYSHSDDGCLKLTTFaan-LLTLSCRISDSYSPQAQSRCVFLTLFPRRIF  
 NP\_000042 RCSRLLVGVLCYCYMGVIAEEEEAYKS-ELFQKAKSLMQCAGESITLTKNKTNEEFRIQS  
 NP\_004949 PG--MPKGLAHQLASPGLTTLPEASDVGSITLALRTLGSFEFEGHSLTQFVRHCADHFLN  
 : . \* : : . : : :

NP\_001175 LEWRTAVYNWALQSSHEVIRASCVSGFFILLQQQNSCNRVPKIL-----I  
 NP\_000042 LRNMMLQLCTRCLSNCTKKSPNKIASGFFLRLLTSKLMNDIADICKSLASFIKKPFDRGEV  
 NP\_004949 SEHKEIRMEAARTCSRLLTPSIHLISGHAHVVSQTAVQVADVLS-----KLL  
 . . . . . : . : : : : :

NP\_001175 DKVKDDSD--IVKKEFASILGQLVCTLHGMFYLTSSLTEPFSEHGHVDFCRN-----  
 NP\_000042 ESMEDDTNGNLMVEVEDQSSMNLFNLDYDSSVSDANEPGESQSTIGAINPLAEEYLSKQDL  
 NP\_004949 VVGITDPDPDIRYCVLASLDERFDAHLAQAEENLQALFVALNDQVFEIRELAICTVG----  
 \*.: : \* : . : :

NP\_001175 -----LKATSOHECSSSQLKASVCKPFLFLLKKKIPSPVKLAFIDNLHHLCKHLD  
 NP\_000042 LFLDMLKFLCLCVTTAQTNTVSFRAADIRKLLMLIDSSTLEPTKSLHLHMYLMLLKELP  
 NP\_004949 -----RLSSMNPAPVMPFLRKMLIQILTELEHSGIGRIKEQSARMLGHLVSNAP  
 : : : : : \* : : \* : :

NP\_001175 -----FREDETDVKAUIGTLLNLMEDPDKD-----  
 NP\_000042 GEEYPLPMEDVLELLKPLSNVCSLYRRDQDVCKTILNHVLHVVKNLGQSNMDSENTRDAQ  
 NP\_004949 -----RLIRPYMEPIKALILKLKDPDPDPNPG-----  
 \* . : : \* : : : : .

NP\_001175 -----VRVAFSGNIKHILES-----LDSEDFIKELFV  
 NP\_000042 GQFLTIVIGAFWHLTKERKYIFSVRMALVNCLKTLLLEADPYSKWAILNVMGKDFPVNEVFT  
 NP\_004949 -----VINNVLATIGELAQVSG-----LEMWKVDELFI  
 \* . : : : : : : : \*

NP\_001175 LRMKEAYTHAQISRNNELKDTLILTTGDIGRAAKGDLVPFALLHLLHCLLSKSASVSGAA  
 NP\_000042 QFLADNHHQVRMLAAESINRLFQDTKGDSSRLKALPLKLQQTAFENAYLKAQEGMREMS  
 NP\_004949 IIMDMLQDSSLLAKRQVALWTLGQLVASTGYVVEPYRKYPITLLEVLLNPLKTEQNQGRTR  
 : : : : . . : . \* . .

NP\_001175 YTEIR-----ALVAAKSVKLQSFFSQYKKP-----ICQFLV  
 NP\_000042 HSAENPETLDEIYNRKSULLTLIAVVLSCSPICEKQALFALCKSVKENGLEPHLVKKVLE  
 NP\_004949 EAIRVLG-----LLGALD  
 : : \*

NP\_001175 ESLHSSQMTALPNTPCQADVRKQDVAHQREMAINTLSEIANVDFPDLNRFLTRTLQVL  
 NP\_000042 KVSETFGYRRLEDFMASHLDYLVLEWLNLDTEYNLSSFPFILLNYTNIEDFYRSCYKVL  
 NP\_004949 PYKHKVNIGMIDQSRDASAVSLSESQSSQDSSDYSTSEMLVNMGNLPLDEFYPAVSMVAL  
 . . : : . . . : : : : \*

NP\_001175 LPDLAAKASPAASALIRTLGKQLNVNRREILINNFKYIFSHLVCSCSKDELERALHLYKN  
 NP\_000042 IPHLVIRS---HFDEVKSIANQIQEDWKSLLTDCFPKILVNILPYFAYEGTRDSGMAQQR  
 NP\_004949 MRIFRDQSLSHHHTMVVQAITFIFKSLGLKCVQFLPQVMPTFLNVIR--VCDGAIREFLF  
 : : : : : : : : : : :

NP\_001175 ETEIELGSLLR-----QDFQGLHNEILLRIGEHYQQVFNGLSILASFASSD  
 NP\_000042 ETATKVYDMLKSENLLGKQIDHLFISNLPEIVVELLMTLHEPANSSASQSTDLCDFSGDL  
 NP\_004949 QQLGMLVSFVK-----SHIRPYMDEIVTLMREFVWMNTSIQSTIILLIEQI  
 : : : : : : : \* : : \* . : : :

NP\_001175 DPYQGRDIIISPELMADYLOP-----KLLGILAFFN-----MQLLSSSVGIEDKK  
 NP\_000042 DPAPNPPHFP SHVIKATFAYISNCHKTKLSILEILSKSPDSYQKILLAICEQAAETNNV  
 NP\_004949 VVALGGEFKLYLPQLIPHMLR-----VFMHDNSPGR  
 . .

NP\_001175 MALNSLMSLMKLMGP---KHVSSVR-----VKMMTTLRTGLRFKDDFP-----  
 NP\_000042 YKKHRILKIYHLFVS---LLLKDIKSGLGGAWAFVLRDVIYTLIHYINQRPSCIMDVSLR  
 NP\_004949 IVSIKLLAAIQLFGANLDDYLH-----LLLPPIVKLFDAPEAPLPSR-----  
           : :   \* : .       :       . : :       \*  
  
 NP\_001175 --ELCCRAWDCFVRCLDHACLGSLLSHVIVALLPLIHIQ-----PKETAAlFHYLIEN  
 NP\_000042 SFSLCCDLLSQVCQTAVTYCKDALENHLHVIVGTLIPLVYEQVEVQKQVLDLLKYLVIDN  
 NP\_004949 --KAALETVDRLTESLDFTDYASRIIHPIVRTLDQSPELR-----STAMDTLSSLVFQL  
           . .       . . .       : \* \*       . . : \* : :  
  
 NP\_001175 RD--AVQDFLHEIYFLPDHPELKKIKAVLQEQYRKETSESTDLOTTQLQSMKAIQHENVDV  
 NP\_000042 KDNNENLYITIKLLDPFPDHFVFKDLRITQQKIKYSRGPFSLEEINHFLSVSVYDALPLT  
 NP\_004949 GKQYQIFIPMVNKVLRVRHRINHQRVDVLCRIVKGYTLADEEEDPLIYQHRMLRSGQGDA  
           . : : . . : :       .       :       : .  
  
 NP\_001175 RIHALTSLK--ETLYKNQEKLIKYATDS--ETVEPIISQLVTVLLKGCQDAN-----SQA  
 NP\_000042 RLEGLKDLR--RQLELHKDQMDIMRASQDNPDGIMVKLVVNLLQLSKMAINHTGEKEV  
 NP\_004949 LASGPVETGPMKKLHVSTINLQKAWGAARRVSKDDWLEWLRRLSLELLKDSS-----  
           . .       . \*       : : . : . : : \*       \* : : :  
  
 NP\_001175 RLLCGECLGELGAIDPGRLDFTTETQGKDFTFVTGVEDSSSFAYGLLMELTRAYLAYADN  
 NP\_000042 LEAVGSCLGEGVPIDFSTIAIQHSDKASYTKALKLFEDKE-----LQWTFIMLTYLNN  
 NP\_004949 SPSLRSCWALAQAYNPMARDLFNAAFVSCWSELNEDQQDE-----LIRSIEL  
           .\* . . : : : . : : : : : : : : : : : : : : : :  
  
 NP\_001175 SRAQDSAAAIQELLSIYDCREMETNGPGHQWRRFPEHVREILEPHLNTR-----YKSS  
 NP\_000042 TLVEDCVKVRSAAVTCLKNILATKTGHSFWEIYKMTTDPMLAYLQPFRTSRKKFLEVPRF  
 NP\_004949 ALTSQDIAEVTQTLLNLAEFMEHSDKGP----LPLRDDNGIVLLGERAAKCRAYAKALHY  
           : . : : : : : : : : : : \*       .  
  
 NP\_001175 QKSTDWSGVKKPIYLSKLGSNFAEWSASWAGYLITKVRHDLASKIFTCCSIMMKHDFKVT  
 NP\_000042 DKENPFEGLDLNLWIPLSENHDIWIKTLTCAFLDSG--GTKCEILQLLKPMCEVKTDFC  
 NP\_004949 KELEFQKGPTPAILESLSINNKLQQPEAAAGVLEYA-----MKHFGELEIQATWYEKLH  
           .:       .\*       : . \*       : . : : : .       ..  
  
 NP\_001175 IYLLPHILVYVLLGCNQEDQQEVYAEIMAVLKHDDQHTINTQDIAS-DLCQLSTQTVFSM  
 NP\_000042 QTVLPYLIHDILLQDTNESWRNLLSTHVQGFFTSCLRHFSTQTSRST-TPANLDSESEHFF  
 NP\_004949 EWEDALVAYDKKMDTNKDDPELMLGRMRCLEALGEWGQLHQQCEKWTLVNDETQAKMAR  
           . : : : . : . . : .       . : . : : : : : : : : : : :  
  
 NP\_001175 LDHLTQWARHKFQALKAIEKCPHSK--SNRNKVDSMVSTVDYEDYQSVTR-----FLDLIP  
 NP\_000042 RCCLDKKSQRTMLAVVDYMRQRKPSSGTIFNDAFWLDLNYLEVAKVAQSCAAHFTALLY  
 NP\_004949 MAAAAWGLGQWDSMEEYTCMIPRDTHDGAFYRAVLALH--QDLFSLAQQCIDKARDLLD  
           .       : : : : .       : .       : : : : : \* :  
  
 NP\_001175 QDTLAVASFRSKAYTRAVMHFESFITEKKQNIQEHLG-----FLQKLYAAMHEPDG  
 NP\_000042 AEIYADKKSMDDQEKRLAFEEGSQSTTISSLSEKSKEETGISLQDLLLLIYRSIGEPDS  
 NP\_004949 AELTAMAG-----ESYSRAYGAMVSCHMLSELEEVIO-----YKLVPERRE  
           : \*       . : .       . . . \*       \* : \*  
  
 NP\_001175 VAGVSAIRKAEPSLKEQILEHESLGLLRDATAICYDRAIQLEPDQIIHYHGVVKSMLGLGQ  
 NP\_000042 LYCGGGKMLQPITRLRTYEHEAMWGKALVTYDLETAIPSS----TRQAGIIQALQNLGL  
 NP\_004949 IIRQIWWERLQGCQRIVEDWQKILMVRSLVSPHEDMRTWL-----KYASLCGKSGRLAL  
           : . : : : : : : : : : : : : : : : : \* .  
  

FAT-domain  


 NP\_001175 LSTVITQVNGVHANRSEWTDENLTYRVEAAWKLSQWDLVENYLAADGKSTTWSVRLGQLL  
 NP\_000042 CHILSVYLKGLDYENKDWCPLEELHYQAAWRNMQWDHCT-SVSKEVEGTSYHESLYNAL  
 NP\_004949 AHKTLVLLLGVDPSR-QLDHPLPTVHPQVTYAYMKN-----MWKSARKIDAFQHMQHFFV  
           . : \* : . . : \* : : : : : : : : : : : : : : : : : : : : : :

NP\_001175 LSAKKRDITAFYDSLKLVRAEQIVPLSAASFERSYQRGYFYIVRLHMLCELEHSIKPLF  
 NP\_000042 QSLRDRFSTFYESLKYARVKEVEEMCKRSLES--VYSLYPTLSRLQAIGELESIGELFS  
 NP\_004949 QTMQQAQAHAIATEDQQHKQELHKL MARCFLKLG-----EWQLNLQGINESTIPKVLQY  
 : :.: :. : : : :. : : .\*: : \*

NP\_001175 QHSPGDSSQEDSLNWVARLEMTQNS-YRAKEPILALRRALLSLNKRPDYN-----EM  
 NP\_000042 RSVTHRQLSEVYIKWQKHSQLLKDSDFSQEPIMALRTVILEILMEKEMDNSQRECIKDI  
 NP\_004949 YSAATEHDRSWYKAHAWAVMNF EAVLHYKHQHQARD-----EKE  
 . . \* : :. : \* :

NP\_001175 VGECWLQ SARVARKAGHHQTAYNALLNAGES-----RLAELYVERAKWLWSKGDVHQALI  
 NP\_000042 LTKHLVELSILARTFKNTQLPERAIFQIKQYNSVSCGVSEWQLEEAQVFWAKKEQSLALS  
 NP\_004949 KKL RHASGANITNATTAATTAATATT--TAS-----TEGSNSESEA  
 . : :.: . \*

NP\_001175 VLQKGVELCFPENETPPEGKNMLIHGRAMLLVGRFMEETANFESNAIMKKYKDVTA CLPE  
 NP\_000042 ILKQMIKKLDASCAAN-NPSLKLTYTECLRVCGNWLAETCLENPAVIMQTYLEKAVEVAG  
 NP\_004949 ESTENSPTPSPLQKKVTEDL SKTLLMYTVPVAVQGFFRSISLSRGNNLQDTRLVLTWFDY  
 : . : : : :. . : .. : .

NP\_001175 WEDG-----HFYLAKEYDKLMPMVTDNKMEKQGD LIRYIVLHFGRSLO  
 NP\_000042 NYDGESSDEL RNGKMKAFSLARFSDTQYQRIENYMKSSFEFENKQALLKRAKEEVGLLRE  
 NP\_004949 GHWP-----DVNEALVEGVKAIQIDTWLQVIPQLIARIDTPRP  
 : : :. :.: : :

NP\_001175 YGNQFIYQSMRMLTLWL DYGTKAYEWE-KAGRSDRVQMR-----  
 NP\_000042 HKIQTNRYTVKVQRELELDELALRALKE-DRKRFLCKAVENYINCLLSGEEHDMWVFRLC  
 NP\_004949 LVGR LIHQLLTDIGRYHPQALIYPLTVASKSTTTARHN-----  
 : : : .

### TEL1 PI3-family

NP\_001175 -----NDLGKINKVITEHTNYLAPYQFLTAFSQLISRICHSDH---EVFVVLMEIIAKV  
 NP\_000042 SLWLENSGVSEVNGMMKRDGMKIPTYKFLPLMYQLAARMGTMKGGLGFHEVLNNLISRI  
 NP\_004949 -----AANKILKNMCEHSNTLVQQAMMVSEELIRVAILWHEMWHEGLEEASRLYFGER  
 :.: :. : : : : . . :.:

NP\_001175 FLAYPQQAMMMMTAVSKS-----SYPMRVNRCKEILNKAIHMKKSLEKFVG DATRLTDK  
 NP\_000042 SMDHPHHTLFIILALANANRDEFLTKEVARRSRITKNVPKQSSQLDEDRTEAANRICT  
 NP\_004949 NVKGMFEVLEPLHAMMER-----GPQTLKETSFNQAYGRDLMEAQ  
 : ..: : \*: : . .: . . :

NP\_001175 LLELCNKPVDGSSSTLSMSTHFKMLKKLVEEATFSEILIP LQS---VMIPTLPSILGTHA  
 NP\_000042 IRSRRPQMVR SVEALCDAYIILANLDATQWK TQRKGINIPADQPITKLKNLEDVVVPTME  
 NP\_004949 EWCRKYMKSGNVKDLTQAWDLYYHVFRRISKQLPQLTSLELQYVSPKLLMCRDLELAVPG  
 . . . : . : : : : .

### Kinase domain

NP\_001175 NHASHEPFP GHWAYIAGFDDMVEILASLQPKKISLKGSDGKFYIMMCKPKDDL RKDCRL  
 NP\_000042 IKVDHTGEYGNLVTIQSFKA EFRLAGGVNLPKIIDCVGSDGKERRQLVKGRDDL RQDAVM  
 NP\_004949 TYDPNQ---PIIRIQSIAPSLQVITSKQRPRKLTLMG SNGHEFVFLKGHEDLRQDERV  
 : \* :. :. : \*: : \*\*:\*: : \* :\*:\*: :

NP\_001175 MEFNSLINKLRKDAESRRRELHIRT YAVIPLNDECGIIEWVNNTAGLRPILTKLYK---  
 NP\_000042 QQVFQMCNTLLQRNTETRRKRKLTICTYKV VPLSQRSGVLEWCTGTVP IGEFLVNNEDGAH  
 NP\_004949 MQLFGLVNTLLANDPTSLRKNLSIQRYAVIPLSTNSGLIGWVPHCDTLHALIRDYRE---  
 :. : \* . \* :. : :\*: \* \* \*:\*. :\*: : \* : :. .

NP\_001175 --EKGVYMTGKELRQCMLPKSAALSEKLKV FREFLPRHPPIFHEWFLRTFPDPTSWYS  
 NP\_000042 KRYRPND FSAFQCQKKMMEVQKKSFE EKYEVFMDVCQN-FQPVFRYFCMEKFLDPAIWFE  
 NP\_004949 KKKILLNIEHRIMLRMAPDYDHLTLMQKVEVF EHAVNNTAGDDLAKLLWLKSPSSEVWFD  
 : . : : \* :\*: . : . . \* :.

MTORXray RMLTNAMEVTGLDGNIRITCHTVMEVLREHK--DSVMVLEAFVYDPLLNWRL  
S6KINas KKLLKRNAASRLGAGPGDAGEVQAHPPFRHINWEELLARKVEPPFKPLLQS--  
: \* : : \* : : : : \* : : \* : : \* : : \* : : \*



Table S1. Sequence attributes of several proteins that form mTORC1 and mTORC2.

|    |              |         |                    |               |                 |                        |                                                                     |
|----|--------------|---------|--------------------|---------------|-----------------|------------------------|---------------------------------------------------------------------|
| 1  | NP_065812    | 1335AAs | 1-1335/Alg =1335AA | pI 6.4 ( 6.4) | HI 43.1 ( 43.1) | Mass kDa149.0 ( 149.0) | regulatory-associated protein of mTOR isoform 1 [Homo sapiens].     |
| 2  | NP_001272368 | 1732AAs | 1-1732/Alg =1732AA | pI 7.5 ( 7.5) | HI 40.3 ( 40.3) | Mass kDa195.0 ( 195.0) | rapamycin-insensitive companion of mTOR isoform 2 [Homo sapiens].   |
| 3  | NP_001272369 | 1385AAs | 1-1385/Alg =1385AA | pI 6.7 ( 6.7) | HI 39.1 ( 39.1) | Mass kDa155.9 ( 155.9) | rapamycin-insensitive companion of mTOR isoform 3 [Homo sapiens].   |
| 4  | NP_689969    | 1708AAs | 1-1708/Alg =1708AA | pI 7.1 ( 7.1) | HI 40.4 ( 40.4) | Mass kDa192.2 ( 192.2) | rapamycin-insensitive companion of mTOR isoform 1 [Homo sapiens].   |
| 5  | NP_071767    | 326AAs  | 1- 326/Alg = 326AA | pI 5.4 ( 5.4) | HI 34.7 ( 34.7) | Mass kDa 35.9 ( 35.9)  | target of rapamycin complex subunit LST8 isoform a [Homo sapiens].  |
| 6  | NP_001269941 | 308AAs  | 1- 308/Alg = 308AA | pI 7.2 ( 7.2) | HI 35.7 ( 35.7) | Mass kDa 34.0 ( 34.0)  | DEP domain-containing mTOR-interacting protein isoform 2 [Homo      |
| 7  | NP_079117    | 368AAs  | 1- 368/Alg = 368AA | pI 6.3 ( 6.3) | HI 42.7 ( 42.7) | Mass kDa 40.8 ( 40.8)  | proline-rich protein 5-like isoform a [Homo sapiens].               |
| 8  | NP_073620    | 409AAs  | 1- 409/Alg = 409AA | pI 8.0 ( 8.0) | HI 31.5 ( 31.5) | Mass kDa 46.3 ( 46.3)  | DEP domain-containing mTOR-interacting protein isoform 1 [Homo      |
| 9  | P42345       | 2549AAs | 1-2549/Alg =2549AA | pI 6.7 ( 6.7) | HI 43.2 ( 43.2) | Mass kDa288.9 ( 288.9) | RecName: Full=Serine/threonine-protein kinase mTOR; AltName:        |
| 10 | P23443       | 525AAs  | 1- 525/Alg = 525AA | pI 6.2 ( 6.2) | HI 26.9 ( 26.9) | Mass kDa 59.1 ( 59.1)  | RecName: Full=Ribosomal protein S6 kinase beta-1; Short=S6K-beta-1; |

Table S2. Output from search(Lex\_Lyser) with word =:: kinase in Human Genomic Database

| #  | Database-code  | Length | m(kDa) | pI   | HI   | Chromosome | Gene     | Title in database                                                 |
|----|----------------|--------|--------|------|------|------------|----------|-------------------------------------------------------------------|
| 1  | NP_060370.1    | 199    | 22     | 11.2 | 24.1 | 1p36.33    | AURKAIP1 | aurora kinase A-interacting protein [Homo sapiens].               |
| 2  | NP_001120701.1 | 199    | 22     | 11.2 | 24.1 | 1p36.33    | AURKAIP1 | aurora kinase A-interacting protein [Homo sapiens].               |
| 3  | NP_001120702.1 | 199    | 22     | 11.2 | 24.1 | 1p36.33    | AURKAIP1 | aurora kinase A-interacting protein [Homo sapiens].               |
| 4  | NP_277028.1    | 771    | 90     | 5.2  | 17.0 | 1p36.33    | CDK11B   | cyclin-dependent kinase 11B isoform 9 [Homo sapiens].             |
| 5  | NP_277027.1    | 780    | 91     | 5.2  | 17.3 | 1p36.33    | CDK11B   | cyclin-dependent kinase 11B isoform 8 [Homo sapiens].             |
| 6  | NP_277021.1    | 782    | 91     | 5.3  | 16.6 | 1p36.33    | CDK11B   | cyclin-dependent kinase 11B isoform 2 [Homo sapiens].             |
| 7  | NP_277023.1    | 737    | 86     | 5.1  | 17.4 | 1p36.33    | CDK11B   | cyclin-dependent kinase 11B isoform 4 [Homo sapiens].             |
| 8  | NP_277024.1    | 748    | 87     | 5.2  | 17.1 | 1p36.33    | CDK11B   | cyclin-dependent kinase 11B isoform 5 [Homo sapiens].             |
| 9  | NP_277022.1    | 526    | 59     | 4.4  | 24.3 | 1p36.33    | CDK11B   | cyclin-dependent kinase 11B isoform 3 [Homo sapiens].             |
| 10 | NP_277071.2    | 770    | 90     | 5.1  | 17.7 | 1p36.33    | CDK11A   | cyclin-dependent kinase 11A isoform 4 [Homo sapiens].             |
| 11 | NP_076916.2    | 780    | 91     | 5.2  | 17.4 | 1p36.33    | CDK11A   | cyclin-dependent kinase 11A isoform 1 [Homo sapiens].             |
| 12 | NP_075394.3    | 446    | 49     | 6.0  | 46.0 | 1p36.33    | NADK     | NAD kinase isoform 1 [Homo sapiens].                              |
| 13 | NP_001185922.1 | 446    | 49     | 6.0  | 46.0 | 1p36.33    | NADK     | NAD kinase isoform 1 [Homo sapiens].                              |
| 14 | NP_001185923.1 | 591    | 63     | 6.3  | 47.0 | 1p36.33    | NADK     | NAD kinase isoform 2 [Homo sapiens].                              |
| 15 | NP_001185924.1 | 414    | 45     | 5.7  | 45.9 | 1p36.33    | NADK     | NAD kinase isoform 3 [Homo sapiens].                              |
| 16 | NP_002735.3    | 592    | 68     | 5.4  | 27.5 | 1p36.33-p3 | PRKCZ    | protein kinase C zeta type isoform 1 [Homo sapiens].              |
| 17 | NP_001229803.1 | 488    | 56     | 5.5  | 28.9 | 1p36.33-p3 | PRKCZ    | protein kinase C zeta type isoform 3 [Homo sapiens].              |
| 18 | NP_001028753.1 | 409    | 47     | 4.5  | 31.5 | 1p36.33-p3 | PRKCZ    | protein kinase C zeta type isoform 2 [Homo sapiens].              |
| 19 | NP_001028754.1 | 409    | 47     | 4.5  | 31.5 | 1p36.33-p3 | PRKCZ    | protein kinase C zeta type isoform 2 [Homo sapiens].              |
| 20 | NP_060686.1    | 773    | 86     | 5.8  | 44.4 | 1p36.32    | PANK4    | pantothenate kinase 4 [Homo sapiens].                             |
| 21 | NP_078930.3    | 702    | 79     | 9.3  | 40.7 | 1p36.31    | NOL9     | polynucleotide 5'-hydroxyl-kinase NOL9 [Homo sapiens].            |
| 22 | NP_005017.3    | 1044   | 119    | 6.8  | 39.1 | 1p36.2     | PIK3CD   | phosphatidylinositol 4,5-bisphosphate 3-kinase catalytic subunit  |
| 23 | NP_004949.1    | 2549   | 289    | 6.7  | 43.2 | 1p36.2     | MTOR     | serine/threonine-protein kinase mTOR [Homo sapiens].              |
| 24 | NP_004422.2    | 976    | 106    | 5.8  | 32.4 | 1p36       | EPHA2    | ephrin type-A receptor 2 precursor [Homo sapiens].                |
| 25 | NP_061054.2    | 78     | 9      | 5.1  | 9.0  | 1p36.12    | CAMK2N1  | calcium/calmodulin-dependent protein kinase II inhibitor 1 [Homo  |
| 26 | NP_115785.1    | 581    | 55     | 8.3  | 54.0 | 1p36       | PINK1    | serine/threonine-protein kinase PINK1, mitochondrial precursor    |
| 27 | NP_065387.1    | 1005   | 108    | 7.7  | 36.8 | 1p36.12    | EPHA8    | ephrin type-A receptor 8 isoform 1 precursor [Homo sapiens].      |
| 28 | NP_001006944.1 | 495    | 51     | 5.9  | 34.6 | 1p36.12    | EPHA8    | ephrin type-A receptor 8 isoform 2 precursor [Homo sapiens].      |
| 29 | NP_004433.2    | 987    | 108    | 5.3  | 38.0 | 1p36.1-p35 | EPHB2    | ephrin type-B receptor 2 isoform 2 precursor [Homo sapiens].      |
| 30 | NP_059145.2    | 986    | 108    | 5.2  | 38.1 | 1p36.1-p35 | EPHB2    | ephrin type-B receptor 2 isoform 1 precursor [Homo sapiens].      |
| 31 | NP_076942.1    | 357    | 40     | 7.3  | 16.8 | 1p36.11    | AUNIP    | aurora kinase A and ninein-interacting protein [Homo sapiens].    |
| 32 | NP_690048.1    | 341    | 39     | 6.4  | 39.0 | 1p36.11    | PDIK1L   | serine/threonine-protein kinase PDIK1L [Homo sapiens].            |
| 33 | NP_001230461.1 | 341    | 39     | 6.4  | 39.0 | 1p36.11    | PDIK1L   | serine/threonine-protein kinase PDIK1L [Homo sapiens].            |
| 34 | NP_001230462.1 | 341    | 39     | 6.4  | 39.0 | 1p36.11    | PDIK1L   | serine/threonine-protein kinase PDIK1L [Homo sapiens].            |
| 35 | NP_006305.2    | 713    | 79     | 5.1  | 31.6 | 1p36.11    | CNKSR1   | connector enhancer of kinase suppressor of ras 1 [Homo sapiens].  |
| 36 | NP_002944.2    | 735    | 83     | 7.7  | 33.5 | 1p         | RPS6KA1  | ribosomal protein S6 kinase alpha-1 isoform a [Homo sapiens].     |
| 37 | NP_001006666.1 | 744    | 84     | 9.0  | 34.1 | 1p         | RPS6KA1  | ribosomal protein S6 kinase alpha-1 isoform b [Homo sapiens].     |
| 38 | NP_004663.3    | 1288   | 143    | 6.7  | 41.2 | 1p36.11    | MAP3K6   | mitogen-activated protein kinase kinase kinase 6 [Homo sapiens].  |
| 39 | NP_001036194.1 | 529    | 59     | 5.3  | 31.9 | 1p36.2-p36 | FGR      | tyrosine-protein kinase Fgr [Homo sapiens].                       |
| 40 | NP_005239.1    | 529    | 59     | 5.3  | 31.9 | 1p36.2-p36 | FGR      | tyrosine-protein kinase Fgr [Homo sapiens].                       |
| 41 | NP_001036212.1 | 529    | 59     | 5.3  | 31.9 | 1p36.2-p36 | FGR      | tyrosine-protein kinase Fgr [Homo sapiens].                       |
| 42 | NP_005347.3    | 509    | 58     | 5.1  | 31.7 | 1p34.3     | LCK      | tyrosine-protein kinase Lck precursor [Homo sapiens].             |
| 43 | NP_001036236.1 | 509    | 58     | 5.1  | 31.7 | 1p34.3     | LCK      | tyrosine-protein kinase Lck precursor [Homo sapiens].             |
| 44 | NP_075385.1    | 195    | 20     | 4.5  | 4.1  | 1p35.1     | MARCKSL1 | MARCKS-related protein [Homo sapiens].                            |
| 45 | NP_443073.1    | 268    | 30     | 6.3  | 41.0 | 1p35-p34   | TSSK3    | testis-specific serine/threonine-protein kinase 3 [Homo sapiens]. |
| 46 | NP_001186128.1 | 224    | 25     | 6.3  | 35.3 | 1p34       | AK2      | adenylate kinase 2, mitochondrial isoform c [Homo sapiens].       |
| 47 | NP_037543.1    | 232    | 26     | 8.0  | 36.2 | 1p34       | AK2      | adenylate kinase 2, mitochondrial isoform b [Homo sapiens].       |
| 48 | NP_001616.1    | 239    | 26     | 7.8  | 36.8 | 1p34       | AK2      | adenylate kinase 2, mitochondrial isoform a [Homo sapiens].       |
| 49 | NP_114406.1    | 435    | 49     | 7.8  | 33.8 | 1p34.3     | STK40    | serine/threonine-protein kinase 40 [Homo sapiens].                |
| 50 | NP_005415.1    | 1138   | 123    | 6.5  | 35.5 | 1p34-p33   | TIE1     | tyrosine-protein kinase receptor Tie-1 isoform 1 precursor [Homo  |
| 51 | NP_001240286.1 | 1093   | 120    | 6.6  | 34.9 | 1p34-p33   | TIE1     | tyrosine-protein kinase receptor Tie-1 isoform 2 [Homo sapiens].  |
| 52 | NP_004064.2    | 646    | 72     | 9.4  | 36.8 | 1p34.1     | PLK3     | serine/threonine-protein kinase PLK3 [Homo sapiens].              |
| 53 | NP_009101.2    | 571    | 64     | 6.6  | 31.3 | 1p32       | TESK2    | dual specificity testis-specific protein kinase 2 [Homo sapiens]. |
| 54 | NP_055927.2    | 1798   | 196    | 8.1  | 24.7 | 1p34.1     | MAST2    | microtubule-associated serine/threonine-protein kinase 2 [Homo    |

|     |                |      |     |     |      |            |         |                                                                    |
|-----|----------------|------|-----|-----|------|------------|---------|--------------------------------------------------------------------|
| 55  | NP_003620.3    | 461  | 54  | 5.6 | 15.2 | 1p34.1     | PIK3R3  | phosphatidylinositol 3-kinase regulatory subunit gamma [Homo       |
| 56  | NP_001107644.1 | 461  | 54  | 5.6 | 15.2 | 1p34.1     | PIK3R3  | phosphatidylinositol 3-kinase regulatory subunit gamma [Homo       |
| 57  | NP_001129025.1 | 424  | 47  | 6.4 | 30.7 | 1p33       | MKNK1   | MAP kinase-interacting serine/threonine-protein kinase 1 isoform 3 |
| 58  | NP_003675.2    | 465  | 51  | 6.3 | 32.7 | 1p33       | MKNK1   | MAP kinase-interacting serine/threonine-protein kinase 1 isoform 1 |
| 59  | NP_945324.1    | 347  | 39  | 6.3 | 30.5 | 1p33       | MKNK1   | MAP kinase-interacting serine/threonine-protein kinase 1 isoform 2 |
| 60  | NP_660322.2    | 268  | 32  | 9.6 | 38.4 | 1p33       | MOB3C   | MOB kinase activator 3C isoform 1 [Homo sapiens].                  |
| 61  | NP_958805.1    | 216  | 26  | 8.9 | 39.8 | 1p33       | MOB3C   | MOB kinase activator 3C isoform 2 [Homo sapiens].                  |
| 62  | NP_057392.1    | 228  | 26  | 8.0 | 34.6 | 1p32       | CMPK1   | UMP-CMP kinase isoform a [Homo sapiens].                           |
| 63  | NP_001129612.1 | 179  | 20  | 7.6 | 36.3 | 1p32       | CMPK1   | UMP-CMP kinase isoform b [Homo sapiens].                           |
| 64  | NP_001253.1    | 168  | 18  | 6.1 | 39.3 | 1p32       | CDKN2C  | cyclin-dependent kinase 4 inhibitor C [Homo sapiens].              |
| 65  | NP_523240.1    | 168  | 18  | 6.1 | 39.3 | 1p32       | CDKN2C  | cyclin-dependent kinase 4 inhibitor C [Homo sapiens].              |
| 66  | NP_006243.2    | 552  | 62  | 7.6 | 33.5 | 1p31       | PRKAA2  | 5'-AMP-activated protein kinase catalytic subunit alpha-2 [Homo    |
| 67  | NP_001106882.1 | 575  | 63  | 6.0 | 53.6 | 1p32.1     | FGGY    | FGGY carbohydrate kinase domain-containing protein isoform a [Homo |
| 68  | NP_060761.3    | 551  | 60  | 5.9 | 53.5 | 1p32.1     | FGGY    | FGGY carbohydrate kinase domain-containing protein isoform b [Homo |
| 69  | NP_001231643.1 | 463  | 50  | 5.6 | 55.9 | 1p32.1     | FGGY    | FGGY carbohydrate kinase domain-containing protein isoform 3 [Homo |
| 70  | NP_005003.2    | 937  | 101 | 6.3 | 31.3 | 1p32-p31   | ROR1    | tyrosine-protein kinase transmembrane receptor ROR1 isoform 1      |
| 71  | NP_001077061.1 | 393  | 41  | 5.4 | 27.5 | 1p32-p31   | ROR1    | tyrosine-protein kinase transmembrane receptor ROR1 isoform 2      |
| 72  | NP_002218.2    | 1154 | 133 | 7.3 | 29.9 | 1p32.3-p31 | JAK1    | tyrosine-protein kinase JAK1 [Homo sapiens].                       |
| 73  | NP_982289.1    | 223  | 25  | 8.7 | 25.1 | 1p31.3     | AK4     | adenylate kinase isoenzyme 4, mitochondrial [Homo sapiens].        |
| 74  | NP_037542.1    | 223  | 25  | 8.7 | 25.1 | 1p31.3     | AK4     | adenylate kinase isoenzyme 4, mitochondrial [Homo sapiens].        |
| 75  | NP_001005353.1 | 223  | 25  | 8.7 | 25.1 | 1p31.3     | AK4     | adenylate kinase isoenzyme 4, mitochondrial [Homo sapiens].        |
| 76  | NP_057062.1    | 835  | 93  | 6.3 | 42.1 | 1p31.1     | TNNI3K  | serine/threonine-protein kinase TNNI3K [Homo sapiens].             |
| 77  | NP_777283.1    | 562  | 63  | 4.8 | 27.4 | 1p31       | AK5     | adenylate kinase isoenzyme 5 isoform 1 [Homo sapiens].             |
| 78  | NP_036225.2    | 536  | 60  | 4.8 | 26.9 | 1p31       | AK5     | adenylate kinase isoenzyme 5 isoform 2 [Homo sapiens].             |
| 79  | NP_002722.1    | 351  | 41  | 9.1 | 26.2 | 1p31.1     | PRKACB  | cAMP-dependent protein kinase catalytic subunit beta isoform 2     |
| 80  | NP_997461.1    | 257  | 30  | 9.4 | 29.6 | 1p31.1     | PRKACB  | cAMP-dependent protein kinase catalytic subunit beta isoform 3     |
| 81  | NP_891993.1    | 398  | 46  | 9.0 | 23.9 | 1p31.1     | PRKACB  | cAMP-dependent protein kinase catalytic subunit beta isoform 1     |
| 82  | NP_001229786.1 | 358  | 41  | 8.8 | 27.4 | 1p31.1     | PRKACB  | cAMP-dependent protein kinase catalytic subunit beta isoform 4     |
| 83  | NP_001229788.1 | 355  | 41  | 9.0 | 27.6 | 1p31.1     | PRKACB  | cAMP-dependent protein kinase catalytic subunit beta isoform 6     |
| 84  | NP_001229787.1 | 339  | 39  | 9.1 | 27.4 | 1p31.1     | PRKACB  | cAMP-dependent protein kinase catalytic subunit beta isoform 5     |
| 85  | NP_001229789.1 | 357  | 41  | 8.8 | 27.5 | 1p31.1     | PRKACB  | cAMP-dependent protein kinase catalytic subunit beta isoform 7     |
| 86  | NP_001229790.1 | 321  | 37  | 8.3 | 26.8 | 1p31.1     | PRKACB  | cAMP-dependent protein kinase catalytic subunit beta isoform 8     |
| 87  | NP_001229791.1 | 338  | 39  | 9.1 | 27.8 | 1p31.1     | PRKACB  | cAMP-dependent protein kinase catalytic subunit beta isoform 9     |
| 88  | NP_006247.1    | 984  | 112 | 5.9 | 29.3 | 1p22.2     | PNK2    | serine/threonine-protein kinase N2 [Homo sapiens].                 |
| 89  | NP_078802.2    | 563  | 64  | 7.6 | 27.0 | 1p13.3     | EPS8L3  | epidermal growth factor receptor kinase substrate 8-like protein 3 |
| 90  | NP_573444.2    | 593  | 67  | 7.9 | 25.6 | 1p13.3     | EPS8L3  | epidermal growth factor receptor kinase substrate 8-like protein 3 |
| 91  | NP_620641.1    | 594  | 67  | 7.9 | 25.6 | 1p13.3     | EPS8L3  | epidermal growth factor receptor kinase substrate 8-like protein 3 |
| 92  | NP_001136254.1 | 1481 | 163 | 8.0 | 21.9 | 1p12-p11.2 | MAGI3   | membrane-associated guanylate kinase, WW and PDZ domain-containing |
| 93  | NP_690864.2    | 1125 | 123 | 6.0 | 27.4 | 1p12-p11.2 | MAGI3   | membrane-associated guanylate kinase, WW and PDZ domain-containing |
| 94  | NP_938009.1    | 1210 | 131 | 8.1 | 39.3 | 1p13.2     | HIPK1   | homeodomain-interacting protein kinase 1 isoform 1 [Homo sapiens]. |
| 95  | NP_689909.2    | 1075 | 117 | 7.7 | 41.9 | 1p13.2     | HIPK1   | homeodomain-interacting protein kinase 1 isoform 2 [Homo sapiens]. |
| 96  | NP_938010.1    | 836  | 89  | 8.2 | 38.6 | 1p13.2     | HIPK1   | homeodomain-interacting protein kinase 1 isoform 3 precursor [Homo |
| 97  | NP_852003.1    | 816  | 87  | 8.6 | 38.5 | 1p13.2     | HIPK1   | homeodomain-interacting protein kinase 1 isoform 4 [Homo sapiens]. |
| 98  | NP_005390.1    | 272  | 30  | 6.0 | 28.3 | 1q21.1     | PRKAB2  | 5'-AMP-activated protein kinase subunit beta-2 [Homo sapiens].     |
| 99  | NP_057358.2    | 409  | 46  | 9.1 | 13.7 | 1q21.2     | PLEKH01 | pleckstrin homology domain-containing family 0 member 1 [Homo      |
| 100 | NP_001129110.1 | 562  | 63  | 8.2 | 34.5 | 1q21.3     | PIP5K1A | phosphatidylinositol 4-phosphate 5-kinase type-1 alpha isoform 1   |
| 101 | NP_001129108.1 | 522  | 58  | 8.0 | 33.1 | 1q21.3     | PIP5K1A | phosphatidylinositol 4-phosphate 5-kinase type-1 alpha isoform 3   |
| 102 | NP_003548.1    | 549  | 61  | 8.4 | 33.9 | 1q21.3     | PIP5K1A | phosphatidylinositol 4-phosphate 5-kinase type-1 alpha isoform 2   |
| 103 | NP_001129109.1 | 500  | 56  | 7.3 | 37.4 | 1q21.3     | PIP5K1A | phosphatidylinositol 4-phosphate 5-kinase type-1 alpha isoform 4   |
| 104 | NP_002642.1    | 828  | 93  | 5.9 | 37.9 | 1q21       | PI4KB   | phosphatidylinositol 4-kinase beta isoform 1 [Homo sapiens].       |
| 105 | NP_001185702.1 | 801  | 90  | 6.0 | 37.3 | 1q21       | PI4KB   | phosphatidylinositol 4-kinase beta isoform 2 [Homo sapiens].       |
| 106 | NP_001185703.1 | 801  | 90  | 6.0 | 37.3 | 1q21       | PI4KB   | phosphatidylinositol 4-kinase beta isoform 2 [Homo sapiens].       |
| 107 | NP_001185704.1 | 484  | 55  | 5.8 | 37.8 | 1q21       | PI4KB   | phosphatidylinositol 4-kinase beta isoform 3 [Homo sapiens].       |
| 108 | NP_001817.1    | 79   | 10  | 9.4 | 17.7 | 1q21.2     | CKS1B   | cyclin-dependent kinases regulatory subunit 1 [Homo sapiens].      |
| 109 | NP_872631.1    | 207  | 23  | 6.9 | 41.5 | 1q21-q22   | EFNA4   | ephrin-A4 isoform b precursor [Homo sapiens].                      |
| 110 | NP_872632.2    | 193  | 22  | 5.1 | 38.3 | 1q21-q22   | EFNA4   | ephrin-A4 isoform c precursor [Homo sapiens].                      |
| 111 | NP_005218.1    | 201  | 22  | 7.0 | 40.8 | 1q21-q22   | EFNA4   | ephrin-A4 isoform a precursor [Homo sapiens].                      |
| 112 | NP_004943.1    | 238  | 26  | 8.7 | 30.3 | 1q21-q22   | EFNA3   | ephrin-A3 precursor [Homo sapiens].                                |
| 113 | NP_004419.2    | 205  | 22  | 6.5 | 26.2 | 1q21-q22   | EFNA1   | ephrin-A1 isoform a precursor [Homo sapiens].                      |

|     |                |      |     |     |      |            |          |                                                                     |
|-----|----------------|------|-----|-----|------|------------|----------|---------------------------------------------------------------------|
| 114 | NP_872626.1    | 183  | 19  | 6.0 | 26.1 | 1q21-q22   | EFNA1    | ephrin- A1 isoform b precursor [Homo sapiens].                      |
| 115 | NP_003984.2    | 498  | 60  | 9.9 | 23.1 | 1q21       | CLK2     | dual specificity protein kinase CLK2 [Homo sapiens].                |
| 116 | NP_000289.1    | 574  | 62  | 7.6 | 49.3 | 1q21       | PKLR     | pyruvate kinase isozymes R/L isoform 1 [Homo sapiens].              |
| 117 | NP_870986.1    | 543  | 58  | 6.6 | 49.7 | 1q21       | PKLR     | pyruvate kinase isozymes R/L isoform 2 [Homo sapiens].              |
| 118 | NP_001007793.1 | 760  | 84  | 6.3 | 45.1 | 1q21-q22   | NTRK1    | high affinity nerve growth factor receptor isoform 3 [Homo          |
| 119 | NP_002520.2    | 796  | 87  | 6.2 | 44.2 | 1q21-q22   | NTRK1    | high affinity nerve growth factor receptor isoform 2 precursor      |
| 120 | NP_001012331.1 | 790  | 87  | 6.2 | 43.9 | 1q21-q22   | NTRK1    | high affinity nerve growth factor receptor isoform 1 precursor      |
| 121 | NP_001171692.1 | 345  | 39  | 5.2 | 46.1 | 1q23.3     | UHMK1    | serine/threonine-protein kinase Kist isoform 2 [Homo sapiens].      |
| 122 | NP_787062.1    | 419  | 47  | 5.5 | 42.5 | 1q23.3     | UHMK1    | serine/threonine-protein kinase Kist isoform 1 [Homo sapiens].      |
| 123 | NP_653225.2    | 344  | 38  | 5.4 | 45.6 | 1q23.3     | UHMK1    | serine/threonine-protein kinase Kist isoform 3 [Homo sapiens].      |
| 124 | NP_006173.2    | 855  | 94  | 5.0 | 38.6 | 1q23.3     | DDR2     | discoidin domain-containing receptor 2 precursor [Homo sapiens].    |
| 125 | NP_001014796.1 | 855  | 94  | 5.0 | 38.6 | 1q23.3     | DDR2     | discoidin domain-containing receptor 2 precursor [Homo sapiens].    |
| 126 | NP_036606.2    | 261  | 29  | 6.3 | 36.0 | 1q23       | UCK2     | uridine-cytidine kinase 2 [Homo sapiens].                           |
| 127 | NP_443094.3    | 416  | 45  | 5.2 | 9.9  | 1q24.2     | RCSL1    | capZ-interacting protein [Homo sapiens].                            |
| 128 | NP_037462.1    | 376  | 42  | 6.0 | 42.0 | 1q24       | NME7     | nucleoside diphosphate kinase 7 isoform a [Homo sapiens].           |
| 129 | NP_932076.1    | 340  | 38  | 6.4 | 43.5 | 1q24       | NME7     | nucleoside diphosphate kinase 7 isoform b [Homo sapiens].           |
| 130 | NP_001161710.1 | 1058 | 116 | 8.2 | 27.8 | 1q25.2     | ABL2     | Abelson tyrosine-protein kinase 2 isoform h [Homo sapiens].         |
| 131 | NP_001161708.1 | 1161 | 126 | 8.3 | 27.6 | 1q25.2     | ABL2     | Abelson tyrosine-protein kinase 2 isoform f [Homo sapiens].         |
| 132 | NP_001161709.1 | 1079 | 118 | 7.7 | 27.3 | 1q25.2     | ABL2     | Abelson tyrosine-protein kinase 2 isoform g [Homo sapiens].         |
| 133 | NP_009298.1    | 1182 | 128 | 8.0 | 27.2 | 1q25.2     | ABL2     | Abelson tyrosine-protein kinase 2 isoform b [Homo sapiens].         |
| 134 | NP_001161711.1 | 1043 | 114 | 6.9 | 29.9 | 1q25.2     | ABL2     | Abelson tyrosine-protein kinase 2 isoform i [Homo sapiens].         |
| 135 | NP_001129472.1 | 1064 | 116 | 6.5 | 29.2 | 1q25.2     | ABL2     | Abelson tyrosine-protein kinase 2 isoform d [Homo sapiens].         |
| 136 | NP_005149.4    | 1167 | 127 | 6.8 | 28.9 | 1q25.2     | ABL2     | Abelson tyrosine-protein kinase 2 isoform c [Homo sapiens].         |
| 137 | NP_001129473.1 | 542  | 61  | 6.2 | 29.3 | 1q25.2     | ABL2     | Abelson tyrosine-protein kinase 2 isoform e [Homo sapiens].         |
| 138 | NP_598001.1    | 302  | 35  | 8.2 | 32.5 | 1q31.3     | NEK7     | serine/threonine-protein kinase Nek7 [Homo sapiens].                |
| 139 | NP_060678.2    | 386  | 45  | 7.0 | 35.2 | 1q32.1     | ETNK2    | ethanolamine kinase 2 [Homo sapiens].                               |
| 140 | NP_002637.3    | 1634 | 185 | 6.9 | 35.7 | 1q32       | PIK3C2B  | phosphatidylinositol 4-phosphate 3-kinase C2 domain-containing      |
| 141 | NP_955749.1    | 884  | 100 | 6.2 | 37.3 | 1q32.1     | DSTYK    | dual serine/threonine and tyrosine protein kinase isoform 2 [Homo   |
| 142 | NP_056190.1    | 929  | 105 | 6.3 | 37.4 | 1q32.1     | DSTYK    | dual serine/threonine and tyrosine protein kinase isoform 1 [Homo   |
| 143 | NP_112214.1    | 628  | 70  | 9.1 | 27.7 | 1q32.1     | NUAK2    | NUAK family SNF1-like kinase 2 [Homo sapiens].                      |
| 144 | NP_997668.1    | 504  | 58  | 9.3 | 29.4 | 1q31-q32   | CDK18    | cyclin-dependent kinase 18 isoform a [Homo sapiens].                |
| 145 | NP_002587.2    | 474  | 54  | 8.8 | 28.7 | 1q31-q32   | CDK18    | cyclin-dependent kinase 18 isoform b [Homo sapiens].                |
| 146 | NP_997667.1    | 474  | 54  | 8.8 | 28.7 | 1q31-q32   | CDK18    | cyclin-dependent kinase 18 isoform b [Homo sapiens].                |
| 147 | NP_073568.2    | 243  | 27  | 4.8 | 2.1  | 1q32.1     | NUCKS1   | nuclear ubiquitous casein and cyclin-dependent kinase substrate 1   |
| 148 | NP_054721.1    | 716  | 80  | 7.7 | 38.0 | 1q32.1     | IKBKE    | inhibitor of nuclear factor kappa-B kinase subunit epsilon isoform  |
| 149 | NP_001180251.1 | 657  | 74  | 8.0 | 39.0 | 1q32.1     | IKBKE    | inhibitor of nuclear factor kappa-B kinase subunit epsilon isoform  |
| 150 | NP_001180250.1 | 631  | 71  | 6.8 | 38.7 | 1q32.1     | IKBKE    | inhibitor of nuclear factor kappa-B kinase subunit epsilon isoform  |
| 151 | NP_003573.2    | 588  | 66  | 9.6 | 29.8 | 1q32.1     | DYRK3    | dual specificity tyrosine-phosphorylation-regulated kinase 3        |
| 152 | NP_001004023.1 | 568  | 64  | 9.5 | 30.6 | 1q32.1     | DYRK3    | dual specificity tyrosine-phosphorylation-regulated kinase 3        |
| 153 | NP_116584.2    | 400  | 46  | 8.8 | 27.3 | 1q32       | MAPKAPK2 | MAP kinase-activated protein kinase 2 isoform 2 [Homo sapiens].     |
| 154 | NP_004750.1    | 370  | 42  | 8.2 | 26.2 | 1q32       | MAPKAPK2 | MAP kinase-activated protein kinase 2 isoform 1 [Homo sapiens].     |
| 155 | NP_065172.1    | 476  | 53  | 7.5 | 36.1 | 1q32.2     | CAMK1G   | calcium/calmodulin-dependent protein kinase type 1G [Homo sapiens]. |
| 156 | NP_079504.2    | 551  | 64  | 8.5 | 15.8 | 1q32       | TRAF3IP3 | TRAF3-interacting JNK-activating modulator [Homo sapiens].          |
| 157 | NP_001191111.1 | 388  | 45  | 7.2 | 26.8 | 1q32.2-q41 | NEK2     | serine/threonine-protein kinase Nek2 isoform 3 [Homo sapiens].      |
| 158 | NP_002488.1    | 445  | 52  | 9.2 | 24.9 | 1q32.2-q41 | NEK2     | serine/threonine-protein kinase Nek2 isoform 1 [Homo sapiens].      |
| 159 | NP_001191112.1 | 384  | 45  | 8.5 | 27.3 | 1q32.2-q41 | NEK2     | serine/threonine-protein kinase Nek2 isoform 2 [Homo sapiens].      |
| 160 | NP_036556.2    | 1066 | 119 | 4.6 | 29.0 | 1q41       | RPS6KC1  | ribosomal protein S6 kinase delta-1 isoform a [Homo sapiens].       |
| 161 | NP_001129610.1 | 1054 | 117 | 4.6 | 29.2 | 1q41       | RPS6KC1  | ribosomal protein S6 kinase delta-1 isoform b [Homo sapiens].       |
| 162 | NP_061120.3    | 795  | 89  | 9.7 | 23.3 | 1q41       | MARK1    | serine/threonine-protein kinase MARK1 [Homo sapiens].               |
| 163 | NP_009138.1    | 482  | 53  | 7.6 | 39.6 | 1q41       | DUSP10   | dual specificity protein phosphatase 10 isoform a [Homo sapiens].   |
| 164 | NP_653330.1    | 140  | 16  | 9.1 | 37.1 | 1q41       | DUSP10   | dual specificity protein phosphatase 10 isoform b [Homo sapiens].   |
| 165 | NP_653329.1    | 140  | 16  | 9.1 | 37.1 | 1q41       | DUSP10   | dual specificity protein phosphatase 10 isoform b [Homo sapiens].   |
| 166 | NP_002212.3    | 946  | 102 | 8.4 | 21.7 | 1q42.13    | ITPKB    | inositol-trisphosphate 3-kinase B [Homo sapiens].                   |
| 167 | NP_064632.2    | 647  | 72  | 6.5 | 36.0 | 1q42.13    | ADCK3    | chaperone activity of bcl complex-like, mitochondrial [Homo         |
| 168 | NP_055641.3    | 1638 | 186 | 5.9 | 27.7 | 1q42.11    | CDC42BPA | serine/threonine-protein kinase MRCK alpha isoform A [Homo          |
| 169 | NP_003598.2    | 1719 | 196 | 6.0 | 26.6 | 1q42.11    | CDC42BPA | serine/threonine-protein kinase MRCK alpha isoform B [Homo          |
| 170 | NP_001229769.1 | 241  | 27  | 9.3 | 36.5 | 1q32-q41   | GUK1     | guanylate kinase isoform c [Homo sapiens].                          |
| 171 | NP_001152862.1 | 218  | 24  | 7.4 | 38.5 | 1q32-q41   | GUK1     | guanylate kinase isoform a [Homo sapiens].                          |
| 172 | NP_000849.1    | 197  | 22  | 6.1 | 36.5 | 1q32-q41   | GUK1     | guanylate kinase isoform b [Homo sapiens].                          |
| 173 | NP_001152863.1 | 197  | 22  | 6.1 | 36.5 | 1q32-q41   | GUK1     | guanylate kinase isoform b [Homo sapiens].                          |

|     |                |      |     |     |      |            |           |                                                                     |
|-----|----------------|------|-----|-----|------|------------|-----------|---------------------------------------------------------------------|
| 174 | NP_001229768.1 | 197  | 22  | 6.1 | 36.5 | 1q32-q41   | GUK1      | guanylate kinase isoform b [Homo sapiens].                          |
| 175 | NP_115811.2    | 1036 | 114 | 8.8 | 30.9 | 1q42       | KIAA1804  | mitogen-activated protein kinase kinase kinase MLK4 [Homo sapiens]. |
| 176 | NP_859029.1    | 465  | 54  | 6.1 | 28.6 | 1q44       | AKT3      | RAC-gamma serine/threonine-protein kinase isoform 2 [Homo sapiens]. |
| 177 | NP_001193658.1 | 465  | 54  | 6.1 | 28.6 | 1q44       | AKT3      | RAC-gamma serine/threonine-protein kinase isoform 2 [Homo sapiens]. |
| 178 | NP_005456.1    | 479  | 56  | 5.7 | 27.8 | 1q44       | AKT3      | RAC-gamma serine/threonine-protein kinase isoform 1 [Homo sapiens]. |
| 179 | NP_001243407.1 | 366  | 40  | 7.0 | 44.0 | 2p25.2     | CMPK2     | UMP-CMP kinase 2, mitochondrial isoform 3 precursor [Homo sapiens]. |
| 180 | NP_997198.2    | 449  | 39  | 5.6 | 37.3 | 2p25.2     | CMPK2     | UMP-CMP kinase 2, mitochondrial isoform 1 precursor [Homo sapiens]. |
| 181 | NP_001243406.1 | 409  | 45  | 7.1 | 40.6 | 2p25.2     | CMPK2     | UMP-CMP kinase 2, mitochondrial isoform 2 precursor [Homo sapiens]. |
| 182 | NP_065789.1    | 1771 | 197 | 6.2 | 32.4 | 2p24       | KIDINS220 | kinase D-interacting substrate of 220 kDa [Homo sapiens].           |
| 183 | NP_004841.2    | 1388 | 161 | 5.7 | 18.7 | 2p24       | ROCK2     | rho-associated protein kinase 2 [Homo sapiens].                     |
| 184 | NP_000212.1    | 298  | 33  | 5.6 | 41.6 | 2p23.3     | KHK       | ketoheokinase isoform a [Homo sapiens].                             |
| 185 | NP_006479.1    | 298  | 33  | 5.9 | 39.6 | 2p23.3     | KHK       | ketoheokinase isoform b [Homo sapiens].                             |
| 186 | NP_001477.2    | 625  | 69  | 6.2 | 48.6 | 2p23       | GCKR      | glucokinase regulatory protein [Homo sapiens].                      |
| 187 | NP_004295.2    | 1620 | 175 | 6.6 | 36.0 | 2p23       | ALK       | ALK tyrosine kinase receptor precursor [Homo sapiens].              |
| 188 | NP_001129124.1 | 510  | 57  | 8.0 | 27.3 | 2p22-p21   | EIF2AK2   | interferon-induced, double-stranded RNA-activated protein kinase    |
| 189 | NP_001129123.1 | 551  | 62  | 8.5 | 27.4 | 2p22-p21   | EIF2AK2   | interferon-induced, double-stranded RNA-activated protein kinase    |
| 190 | NP_002750.1    | 551  | 62  | 8.5 | 27.4 | 2p22-p21   | EIF2AK2   | interferon-induced, double-stranded RNA-activated protein kinase    |
| 191 | NP_005804.1    | 890  | 100 | 6.4 | 35.1 | 2p21       | PRKD3     | serine/threonine-protein kinase D3 [Homo sapiens].                  |
| 192 | NP_001257354.1 | 873  | 99  | 7.7 | 34.6 | 2p22.1     | MAP4K3    | mitogen-activated protein kinase kinase kinase kinase 3 isoform 2   |
| 193 | NP_003609.2    | 894  | 101 | 7.3 | 33.8 | 2p22.1     | MAP4K3    | mitogen-activated protein kinase kinase kinase kinase 3 isoform 1   |
| 194 | NP_612379.2    | 493  | 54  | 8.3 | 37.1 | 2p21       | PKDCC     | protein kinase domain-containing protein, cytoplasmic precursor     |
| 195 | NP_005391.1    | 737  | 84  | 6.7 | 33.1 | 2p21       | PRKCE     | protein kinase C epsilon type [Homo sapiens].                       |
| 196 | NP_001734.1    | 149  | 17  | 3.9 | 16.8 | 2p21       | CALM2     | calmodulin [Homo sapiens].                                          |
| 197 | NP_001123952.1 | 508  | 58  | 9.1 | 26.4 | 2p16.1     | VRK2      | serine/threonine-protein kinase VRK2 isoform 1 [Homo sapiens].      |
| 198 | NP_001123953.1 | 508  | 58  | 9.1 | 26.4 | 2p16.1     | VRK2      | serine/threonine-protein kinase VRK2 isoform 1 [Homo sapiens].      |
| 199 | NP_006287.2    | 508  | 58  | 9.1 | 26.4 | 2p16.1     | VRK2      | serine/threonine-protein kinase VRK2 isoform 1 [Homo sapiens].      |
| 200 | NP_001123955.1 | 396  | 45  | 9.4 | 26.8 | 2p16.1     | VRK2      | serine/threonine-protein kinase VRK2 isoform 3 [Homo sapiens].      |
| 201 | NP_001123954.1 | 485  | 55  | 9.0 | 27.4 | 2p16.1     | VRK2      | serine/threonine-protein kinase VRK2 isoform 2 [Homo sapiens].      |
| 202 | NP_055726.3    | 961  | 104 | 6.1 | 29.1 | 2p14       | AAK1      | AP2-associated protein kinase 1 [Homo sapiens].                     |
| 203 | NP_060691.2    | 216  | 25  | 6.5 | 34.7 | 2p13.1     | MOB1A     | MOB kinase activator 1A [Homo sapiens].                             |
| 204 | NP_001372.1    | 481  | 52  | 6.0 | 22.2 | 2p13       | DOK1      | docking protein 1 isoform 1 [Homo sapiens].                         |
| 205 | NP_001184189.1 | 342  | 37  | 5.1 | 15.2 | 2p13       | DOK1      | docking protein 1 isoform 2 [Homo sapiens].                         |
| 206 | NP_000180.2    | 917  | 102 | 5.7 | 41.8 | 2p13       | HK2       | hexokinase-2 [Homo sapiens].                                        |
| 207 | NP_004827.4    | 1116 | 122 | 5.1 | 31.4 | 2p12       | EIF2AK3   | eukaryotic translation initiation factor 2-alpha kinase 3 precursor |
| 208 | NP_001070.2    | 619  | 70  | 7.5 | 31.8 | 2q12       | ZAP70     | tyrosine-protein kinase ZAP-70 isoform 1 [Homo sapiens].            |
| 209 | NP_997402.1    | 312  | 36  | 7.5 | 31.7 | 2q12       | ZAP70     | tyrosine-protein kinase ZAP-70 isoform 2 [Homo sapiens].            |
| 210 | NP_001229488.1 | 1239 | 142 | 7.1 | 24.6 | 2q11.2-q12 | MAP4K4    | mitogen-activated protein kinase kinase kinase kinase 4 isoform 4   |
| 211 | NP_663720.1    | 1212 | 139 | 7.1 | 24.9 | 2q11.2-q12 | MAP4K4    | mitogen-activated protein kinase kinase kinase kinase 4 isoform 3   |
| 212 | NP_663719.2    | 1273 | 145 | 7.1 | 24.3 | 2q11.2-q12 | MAP4K4    | mitogen-activated protein kinase kinase kinase kinase 4 isoform 2   |
| 213 | NP_001229489.1 | 1235 | 141 | 7.1 | 24.6 | 2q11.2-q12 | MAP4K4    | mitogen-activated protein kinase kinase kinase kinase 4 isoform 5   |
| 214 | NP_004825.3    | 1165 | 133 | 7.4 | 26.1 | 2q11.2-q12 | MAP4K4    | mitogen-activated protein kinase kinase kinase kinase 4 isoform 1   |
| 215 | NP_004327.1    | 1085 | 122 | 6.0 | 31.6 | 2q14       | BUB1      | mitotic checkpoint serine/threonine-protein kinase BUB1 [Homo       |
| 216 | NP_006334.2    | 999  | 108 | 5.4 | 43.3 | 2q14.1     | MERTK     | tyrosine-protein kinase Mer precursor [Homo sapiens].               |
| 217 | NP_006600.3    | 619  | 70  | 8.0 | 23.7 | 2q14.3     | MAP3K2    | mitogen-activated protein kinase kinase kinase 2 [Homo sapiens].    |
| 218 | NP_001018056.1 | 510  | 58  | 6.2 | 34.7 | 2q21.3     | MAP3K19   | SPS1/STE20-related protein kinase YSK4 isoform 2 [Homo sapiens].    |
| 219 | NP_079328.3    | 1328 | 151 | 6.6 | 24.5 | 2q21.3     | MAP3K19   | SPS1/STE20-related protein kinase YSK4 isoform 1 [Homo sapiens].    |
| 220 | NP_001104503.1 | 336  | 37  | 7.2 | 45.2 | 2q24.1     | ACVR1C    | activin receptor type-1C isoform 4 precursor [Homo sapiens].        |
| 221 | NP_001104502.1 | 413  | 46  | 7.4 | 46.2 | 2q24.1     | ACVR1C    | activin receptor type-1C isoform 3 precursor [Homo sapiens].        |
| 222 | NP_660302.2    | 493  | 53  | 7.5 | 45.2 | 2q24.1     | ACVR1C    | activin receptor type-1C isoform 1 precursor [Homo sapiens].        |
| 223 | NP_001104501.1 | 443  | 50  | 7.9 | 43.8 | 2q24.1     | ACVR1C    | activin receptor type-1C isoform 2 [Homo sapiens].                  |
| 224 | NP_001096.1    | 509  | 55  | 7.2 | 37.0 | 2q23-q24   | ACVR1     | activin receptor type-1 precursor [Homo sapiens].                   |
| 225 | NP_001104537.1 | 509  | 55  | 7.2 | 37.0 | 2q23-q24   | ACVR1     | activin receptor type-1 precursor [Homo sapiens].                   |
| 226 | NP_037365.2    | 545  | 59  | 5.9 | 40.9 | 2q24.3     | STK39     | STE20/SPS1-related proline-alanine-rich protein kinase [Homo        |
| 227 | NP_078898.3    | 847  | 97  | 7.5 | 47.8 | 2q31       | FASTKD1   | FAST kinase domain-containing protein 1 [Homo sapiens].             |
| 228 | NP_036422.3    | 766  | 87  | 8.9 | 22.6 | 2q31.1     | TLK1      | serine/threonine-protein kinase tousled-like 1 isoform 1 [Homo      |
| 229 | NP_001130026.1 | 718  | 82  | 8.8 | 23.3 | 2q31.1     | TLK1      | serine/threonine-protein kinase tousled-like 1 isoform 2 [Homo      |
| 230 | NP_001130027.1 | 670  | 77  | 9.3 | 22.7 | 2q31.1     | TLK1      | serine/threonine-protein kinase tousled-like 1 isoform 3 [Homo      |
| 231 | NP_002601.1    | 436  | 49  | 9.0 | 32.6 | 2q31.1     | PDK1      | pyruvate dehydrogenase kinase, isozyme 1 [Homo sapiens].            |
| 232 | NP_057737.2    | 800  | 91  | 7.7 | 26.3 | 2q24.2     | ZAK       | mitogen-activated protein kinase kinase kinase MLT isoform 1 [Homo  |

|     |                |      |     |      |      |            |         |                                                                     |
|-----|----------------|------|-----|------|------|------------|---------|---------------------------------------------------------------------|
| 233 | NP_598407.1    | 455  | 52  | 5.0  | 34.7 | 2q24.2     | ZAK     | mitogen-activated protein kinase kinase kinase MLT isoform 2 [Homo  |
| 234 | NP_003681.1    | 313  | 34  | 8.4  | 31.6 | 2q31.2     | PRKRA   | interferon-inducible double stranded RNA-dependent protein kinase   |
| 235 | NP_001132989.1 | 302  | 33  | 8.4  | 34.8 | 2q31.2     | PRKRA   | interferon-inducible double stranded RNA-dependent protein kinase   |
| 236 | NP_001132990.1 | 288  | 32  | 8.4  | 32.3 | 2q31.2     | PRKRA   | interferon-inducible double stranded RNA-dependent protein kinase   |
| 237 | NP_543152.1    | 217  | 24  | 6.1  | 40.6 | 2q32.1     | DUSP19  | dual specificity protein phosphatase 19 isoform 1 [Homo sapiens].   |
| 238 | NP_001135786.1 | 166  | 18  | 8.1  | 33.1 | 2q32.1     | DUSP19  | dual specificity protein phosphatase 19 isoform 2 [Homo sapiens].   |
| 239 | NP_004217.1    | 372  | 42  | 5.0  | 37.1 | 2q32.3     | STK17B  | serine/threonine-protein kinase 17B [Homo sapiens].                 |
| 240 | NP_056202.2    | 225  | 26  | 5.4  | 26.2 | 2q33.1     | MOB4    | MOB-like protein phocein isoform 1 [Homo sapiens].                  |
| 241 | NP_001094289.1 | 204  | 24  | 6.5  | 27.9 | 2q33.1     | MOB4    | MOB-like protein phocein isoform 3 [Homo sapiens].                  |
| 242 | NP_955776.1    | 193  | 22  | 5.7  | 29.0 | 2q33.1     | MOB4    | MOB-like protein phocein isoform 2 [Homo sapiens].                  |
| 243 | NP_001191023.1 | 193  | 22  | 5.7  | 29.0 | 2q33.1     | MOB4    | MOB-like protein phocein isoform 2 [Homo sapiens].                  |
| 244 | NP_001155879.1 | 526  | 62  | 9.1  | 22.2 | 2q33       | CLK1    | dual specificity protein kinase CLK1 isoform 2 [Homo sapiens].      |
| 245 | NP_004062.2    | 484  | 57  | 9.0  | 22.9 | 2q33       | CLK1    | dual specificity protein kinase CLK1 isoform 1 [Homo sapiens].      |
| 246 | NP_061041.2    | 418  | 47  | 6.5  | 38.8 | 2q33.1     | STRADB  | STE20-related kinase adapter protein beta isoform 1 [Homo sapiens]. |
| 247 | NP_001193793.1 | 377  | 42  | 7.9  | 39.8 | 2q33.1     | STRADB  | STE20-related kinase adapter protein beta isoform 2 [Homo sapiens]. |
| 248 | NP_001248364.1 | 429  | 48  | 7.1  | 36.1 | 2q33.2     | CDK15   | cyclin-dependent kinase 15 isoform 1 [Homo sapiens].                |
| 249 | NP_001248365.1 | 400  | 45  | 6.5  | 36.7 | 2q33.2     | CDK15   | cyclin-dependent kinase 15 isoform 2 [Homo sapiens].                |
| 250 | NP_631897.1    | 384  | 44  | 7.1  | 38.5 | 2q33.2     | CDK15   | cyclin-dependent kinase 15 isoform 3 [Homo sapiens].                |
| 251 | NP_055744.2    | 710  | 81  | 7.9  | 47.9 | 2q33.3     | FASTKD2 | FAST kinase domain-containing protein 2 [Homo sapiens].             |
| 252 | NP_001129665.1 | 710  | 81  | 7.9  | 47.9 | 2q33.3     | FASTKD2 | FAST kinase domain-containing protein 2 [Homo sapiens].             |
| 253 | NP_001129666.1 | 710  | 81  | 7.9  | 47.9 | 2q33.3     | FASTKD2 | FAST kinase domain-containing protein 2 [Homo sapiens].             |
| 254 | NP_055855.2    | 2098 | 237 | 6.2  | 27.2 | 2q34       | PIKFYVE | 1-phosphatidylinositol 3-phosphate 5-kinase isoform 2 [Homo         |
| 255 | NP_001171471.1 | 548  | 62  | 6.4  | 18.1 | 2q34       | PIKFYVE | 1-phosphatidylinositol 3-phosphate 5-kinase isoform 4 [Homo         |
| 256 | NP_689884.1    | 451  | 50  | 5.7  | 19.1 | 2q34       | PIKFYVE | 1-phosphatidylinositol 3-phosphate 5-kinase isoform 3 [Homo         |
| 257 | NP_001036064.1 | 1292 | 143 | 6.0  | 31.0 | 2q33.3-q34 | ERBB4   | receptor tyrosine-protein kinase erbB-4 isoform JM-a/CVT-2          |
| 258 | NP_005226.1    | 1308 | 144 | 6.0  | 30.6 | 2q33.3-q34 | ERBB4   | receptor tyrosine-protein kinase erbB-4 isoform JM-a/CVT-1          |
| 259 | NP_056505.2    | 1315 | 144 | 5.5  | 51.6 | 2q35       | STK36   | serine/threonine-protein kinase 36 isoform 1 [Homo sapiens].        |
| 260 | NP_001230242.1 | 1294 | 142 | 5.5  | 51.2 | 2q35       | STK36   | serine/threonine-protein kinase 36 isoform 2 [Homo sapiens].        |
| 261 | NP_059127.2    | 489  | 54  | 5.5  | 44.0 | 2q35       | PRKAG3  | 5'-AMP-activated protein kinase subunit gamma-3 [Homo sapiens].     |
| 262 | NP_003927.1    | 367  | 39  | 10.1 | 33.8 | 2q35       | CDK5R2  | cyclin-dependent kinase 5 activator 2 [Homo sapiens].               |
| 263 | NP_001008910.1 | 305  | 35  | 6.4  | 40.0 | 2q35       | STK16   | serine/threonine-protein kinase 16 [Homo sapiens].                  |
| 264 | NP_005867.3    | 3267 | 354 | 8.4  | 28.2 | 2q35       | SPEG    | striated muscle preferentially expressed protein kinase isoform 1   |
| 265 | NP_001166947.1 | 113  | 13  | 9.7  | 19.5 | 2q35       | SPEG    | striated muscle preferentially expressed protein kinase isoform 4   |
| 266 | NP_443134.2    | 1099 | 121 | 5.2  | 41.6 | 2q35       | STK11IP | serine/threonine-protein kinase 11-interacting protein [Homo        |
| 267 | NP_004429.1    | 986  | 110 | 6.2  | 34.8 | 2q36.1     | EPHA4   | ephrin type-A receptor 4 precursor [Homo sapiens].                  |
| 268 | NP_065915.1    | 653  | 71  | 8.5  | 20.2 | 2q36.3     | NYAP2   | neuronal tyrosine-phosphorylated phosphoinositide-3-kinase adapter  |
| 269 | NP_085126.2    | 1671 | 183 | 4.9  | 28.7 | 2q36       | SPHKAP  | A-kinase anchor protein SPHKAP isoform 2 [Homo sapiens].            |
| 270 | NP_001136116.1 | 1700 | 186 | 4.9  | 28.8 | 2q36       | SPHKAP  | A-kinase anchor protein SPHKAP isoform 1 [Homo sapiens].            |
| 271 | NP_690618.2    | 1214 | 135 | 7.3  | 32.4 | 2q37.1     | DGKD    | diacylglycerol kinase delta isoform 2 [Homo sapiens].               |
| 272 | NP_003639.2    | 1170 | 130 | 7.4  | 33.8 | 2q37.1     | DGKD    | diacylglycerol kinase delta isoform 1 [Homo sapiens].               |
| 273 | NP_110395.1    | 392  | 43  | 6.7  | 30.9 | 2q37.3     | ILKAP   | integrin-linked kinase-associated serine/threonine phosphatase 2C   |
| 274 | NP_001239051.1 | 1288 | 139 | 4.6  | 41.9 | 2q37.3     | PASK    | PAS domain-containing serine/threonine-protein kinase isoform 3     |
| 275 | NP_001239049.1 | 1323 | 143 | 4.6  | 42.3 | 2q37.3     | PASK    | PAS domain-containing serine/threonine-protein kinase isoform 2     |
| 276 | NP_055963.2    | 1323 | 143 | 4.6  | 42.3 | 2q37.3     | PASK    | PAS domain-containing serine/threonine-protein kinase isoform 2     |
| 277 | NP_001239048.1 | 1330 | 144 | 4.6  | 42.0 | 2q37.3     | PASK    | PAS domain-containing serine/threonine-protein kinase isoform 1     |
| 278 | NP_001239053.1 | 1143 | 123 | 4.8  | 41.4 | 2q37.3     | PASK    | PAS domain-containing serine/threonine-protein kinase isoform 4     |
| 279 | NP_006365.2    | 426  | 48  | 6.3  | 31.0 | 2q37.3     | STK25   | serine/threonine-protein kinase 25 [Homo sapiens].                  |
| 280 | NP_001158503.1 | 188  | 21  | 9.1  | 30.9 | 2q37.3     | DTYMK   | thymidylate kinase isoform 2 [Homo sapiens].                        |
| 281 | NP_036277.2    | 212  | 24  | 8.4  | 32.1 | 2q37.3     | DTYMK   | thymidylate kinase isoform 1 [Homo sapiens].                        |
| 282 | NP_003647.1    | 370  | 41  | 5.0  | 35.4 | 3p25.3     | CAMK1   | calcium/calmodulin-dependent protein kinase type 1 [Homo sapiens].  |
| 283 | NP_955379.2    | 712  | 82  | 7.8  | 38.6 | 3p24.1     | NEK10   | serine/threonine-protein kinase Nek10 [Homo sapiens].               |
| 284 | NP_208382.1    | 648  | 74  | 9.1  | 23.8 | 3p22.2     | DCLK3   | serine/threonine-protein kinase DCLK3 [Homo sapiens].               |
| 285 | NP_005100.1    | 527  | 58  | 6.0  | 34.3 | 3p22.2     | OXSRI   | serine/threonine-protein kinase OSR1 [Homo sapiens].                |
| 286 | NP_060356.2    | 1275 | 142 | 5.9  | 49.7 | 3p22.1     | ULK4    | serine/threonine-protein kinase ULK4 [Homo sapiens].                |
| 287 | NP_005784.1    | 194  | 22  | 8.0  | 47.4 | 3p21       | NME6    | nucleoside diphosphate kinase 6 [Homo sapiens].                     |
| 288 | NP_004558.1    | 469  | 54  | 6.2  | 32.6 | 3p22-p21   | PFKFB4  | 6-phosphofructo-2-kinase/fructose-2,6-bisphosphatase 4 [Homo        |
| 289 | NP_057375.2    | 426  | 49  | 6.4  | 27.9 | 3p21.31    | IP6K2   | inositol hexakisphosphate kinase 2 isoform a [Homo sapiens].        |
| 290 | NP_001005909.1 | 426  | 49  | 6.4  | 27.9 | 3p21.31    | IP6K2   | inositol hexakisphosphate kinase 2 isoform a [Homo sapiens].        |
| 291 | NP_001005910.1 | 97   | 11  | 9.4  | 32.0 | 3p21.31    | IP6K2   | inositol hexakisphosphate kinase 2 isoform b [Homo sapiens].        |

|     |                |      |     |     |      |            |          |                                                                    |
|-----|----------------|------|-----|-----|------|------------|----------|--------------------------------------------------------------------|
| 292 | NP_001005911.1 | 97   | 11  | 9.4 | 32.0 | 3p21.31    | IP6K2    | inositol hexakisphosphate kinase 2 isoform b [Homo sapiens].       |
| 293 | NP_001139650.1 | 87   | 10  | 7.4 | 28.7 | 3p21.31    | IP6K2    | inositol hexakisphosphate kinase 2 isoform c [Homo sapiens].       |
| 294 | NP_001139651.1 | 87   | 10  | 7.4 | 28.7 | 3p21.31    | IP6K2    | inositol hexakisphosphate kinase 2 isoform c [Homo sapiens].       |
| 295 | NP_001177246.1 | 188  | 21  | 8.2 | 31.4 | 3p21.31    | IP6K2    | inositol hexakisphosphate kinase 2 isoform e [Homo sapiens].       |
| 296 | NP_001177245.1 | 185  | 21  | 8.7 | 33.5 | 3p21.31    | IP6K2    | inositol hexakisphosphate kinase 2 isoform d [Homo sapiens].       |
| 297 | NP_004148.1    | 404  | 46  | 4.8 | 33.4 | 3p21.3-p21 | PRKAR2A  | cAMP-dependent protein kinase type II-alpha regulatory subunit     |
| 298 | NP_001229758.1 | 441  | 50  | 6.8 | 24.3 | 3p21.31    | IP6K1    | inositol hexakisphosphate kinase 1 isoform 1 [Homo sapiens].       |
| 299 | NP_695005.1    | 441  | 50  | 6.8 | 24.3 | 3p21.31    | IP6K1    | inositol hexakisphosphate kinase 1 isoform 1 [Homo sapiens].       |
| 300 | NP_001006115.1 | 276  | 32  | 8.6 | 27.2 | 3p21.31    | IP6K1    | inositol hexakisphosphate kinase 1 isoform 2 [Homo sapiens].       |
| 301 | NP_001231866.1 | 1351 | 147 | 6.2 | 48.9 | 3p21.3     | MST1R    | macrophage-stimulating protein receptor isoform 2 precursor [Homo  |
| 302 | NP_002438.2    | 1400 | 150 | 6.1 | 49.1 | 3p21.3     | MST1R    | macrophage-stimulating protein receptor isoform 1 preproprotein    |
| 302 | NP_002438.2    | 1400 | 30  | 5.6 | 51.1 | 3p21.3     | MST1R    | macrophage-stimulating protein receptor isoform 1 preproprotein    |
| 302 | NP_002438.2    | 1400 | 119 | 6.0 | 48.8 | 3p21.3     | MST1R    | macrophage-stimulating protein receptor isoform 1 preproprotein    |
| 303 | NP_004626.1    | 382  | 43  | 6.9 | 28.0 | 3p21.3     | MAPKAPK3 | MAP kinase-activated protein kinase 3 [Homo sapiens].              |
| 304 | NP_001230854.1 | 382  | 43  | 6.9 | 28.0 | 3p21.3     | MAPKAPK3 | MAP kinase-activated protein kinase 3 [Homo sapiens].              |
| 305 | NP_001230855.1 | 382  | 43  | 6.9 | 28.0 | 3p21.3     | MAPKAPK3 | MAP kinase-activated protein kinase 3 [Homo sapiens].              |
| 306 | NP_009215.1    | 349  | 40  | 6.4 | 24.4 | 3p21.1     | TWF2     | twinfilin-2 [Homo sapiens].                                        |
| 307 | NP_660305.2    | 523  | 55  | 6.3 | 53.0 | 3p21.1     | GLYCTK   | glycerate kinase isoform 1 [Homo sapiens].                         |
| 308 | NP_001138423.1 | 234  | 25  | 8.6 | 44.9 | 3p21.1     | GLYCTK   | glycerate kinase isoform 2 [Homo sapiens].                         |
| 309 | NP_001180462.1 | 752  | 84  | 7.6 | 27.4 | 3p21.1     | NEK4     | serine/threonine-protein kinase Nek4 isoform 2 [Homo sapiens].     |
| 310 | NP_003148.2    | 841  | 95  | 7.8 | 27.6 | 3p21.1     | NEK4     | serine/threonine-protein kinase Nek4 isoform 1 [Homo sapiens].     |
| 311 | NP_006245.2    | 676  | 78  | 7.6 | 33.4 | 3p21.31    | PRKCD    | protein kinase C delta type [Homo sapiens].                        |
| 312 | NP_997704.1    | 676  | 78  | 7.6 | 33.4 | 3p21.31    | PRKCD    | protein kinase C delta type [Homo sapiens].                        |
| 313 | NP_060241.2    | 578  | 65  | 9.7 | 31.0 | 3p14.3     | PXK      | PX domain-containing protein kinase-like protein [Homo sapiens].   |
| 314 | NP_001028229.1 | 1462 | 162 | 7.4 | 22.9 | 3p14.1     | MAGI1    | membrane-associated guanylate kinase, WW and PDZ domain-containing |
| 315 | NP_056335.1    | 1287 | 140 | 5.7 | 27.7 | 3p14.1     | MAGI1    | membrane-associated guanylate kinase, WW and PDZ domain-containing |
| 316 | NP_004733.2    | 1256 | 137 | 5.5 | 27.0 | 3p14.1     | MAGI1    | membrane-associated guanylate kinase, WW and PDZ domain-containing |
| 317 | NP_005224.2    | 983  | 110 | 6.3 | 34.0 | 3p11.2     | EPHA3    | ephrin type-A receptor 3 isoform a precursor [Homo sapiens].       |
| 318 | NP_872585.1    | 539  | 61  | 5.5 | 29.5 | 3p11.2     | EPHA3    | ephrin type-A receptor 3 isoform b precursor [Homo sapiens].       |
| 319 | NP_001073917.2 | 1130 | 127 | 6.5 | 37.1 | 3q11.2     | EPHA6    | ephrin type-A receptor 6 isoform a [Homo sapiens].                 |
| 320 | NP_775926.1    | 334  | 37  | 8.6 | 42.8 | 3q11.2     | EPHA6    | ephrin type-A receptor 6 isoform b [Homo sapiens].                 |
| 321 | NP_001139628.1 | 420  | 47  | 8.9 | 39.3 | 3q13.3     | GSK3B    | glycogen synthase kinase-3 beta isoform 2 [Homo sapiens].          |
| 322 | NP_002084.2    | 433  | 48  | 8.9 | 39.0 | 3q13.3     | GSK3B    | glycogen synthase kinase-3 beta isoform 1 [Homo sapiens].          |
| 323 | NP_001019831.2 | 2986 | 340 | 5.7 | 29.4 | 3q21.2     | KALRN    | kalirin isoform 1 [Homo sapiens].                                  |
| 324 | NP_003938.1    | 1663 | 192 | 5.7 | 27.4 | 3q21.2     | KALRN    | kalirin isoform 2 [Homo sapiens].                                  |
| 325 | NP_008995.2    | 1289 | 144 | 5.9 | 30.5 | 3q21.2     | KALRN    | kalirin isoform 3 [Homo sapiens].                                  |
| 326 | NP_055417.1    | 1358 | 153 | 6.7 | 39.4 | 3q22.1     | PIK3R4   | phosphoinositide 3-kinase regulatory subunit 4 [Homo sapiens].     |
| 327 | NP_079076.3    | 645  | 74  | 4.9 | 29.0 | 3q22.1     | NEK11    | serine/threonine-protein kinase Nek11 isoform 1 [Homo sapiens].    |
| 328 | NP_001139475.1 | 599  | 69  | 5.2 | 28.9 | 3q22.1     | NEK11    | serine/threonine-protein kinase Nek11 isoform 3 [Homo sapiens].    |
| 329 | NP_665917.1    | 470  | 54  | 5.6 | 30.9 | 3q22.1     | NEK11    | serine/threonine-protein kinase Nek11 isoform 2 [Homo sapiens].    |
| 330 | NP_002949.2    | 607  | 68  | 6.9 | 40.9 | 3q22       | RYK      | tyrosine-protein kinase RYK isoform 2 precursor [Homo sapiens].    |
| 331 | NP_001005861.1 | 610  | 68  | 6.9 | 41.6 | 3q22       | RYK      | tyrosine-protein kinase RYK isoform 1 precursor [Homo sapiens].    |
| 332 | NP_004432.1    | 984  | 108 | 6.1 | 37.8 | 3q21-q23   | EPHB1    | ephrin type-B receptor 1 precursor [Homo sapiens].                 |
| 333 | NP_006210.1    | 1070 | 123 | 6.7 | 42.8 | 3q22.3     | PIK3CB   | phosphatidylinositol 4,5-bisphosphate 3-kinase catalytic subunit   |
| 334 | NP_001242974.1 | 582  | 67  | 8.1 | 41.8 | 3q22.3     | PIK3CB   | phosphatidylinositol 4,5-bisphosphate 3-kinase catalytic subunit   |
| 335 | NP_631948.1    | 553  | 62  | 6.2 | 38.7 | 3q24       | GRK7     | G protein-coupled receptor kinase 7 [Homo sapiens].                |
| 336 | NP_001034636.1 | 529  | 59  | 6.5 | 45.7 | 3q23       | GK5      | putative glycerol kinase 5 [Homo sapiens].                         |
| 337 | NP_001175.2    | 2644 | 301 | 7.1 | 45.4 | 3q23       | ATR      | serine/threonine-protein kinase ATR [Homo sapiens].                |
| 338 | NP_002731.4    | 596  | 68  | 5.5 | 26.8 | 3q26.3     | PRKCI    | protein kinase C iota type [Homo sapiens].                         |
| 339 | NP_001155038.1 | 1268 | 144 | 6.7 | 24.6 | 3q26.31    | TNIIK    | TRAF2 and NCK-interacting protein kinase isoform 8 [Homo sapiens]. |
| 340 | NP_001155037.1 | 1276 | 145 | 6.7 | 24.3 | 3q26.31    | TNIIK    | TRAF2 and NCK-interacting protein kinase isoform 7 [Homo sapiens]. |
| 341 | NP_001155034.1 | 1323 | 150 | 6.9 | 23.9 | 3q26.31    | TNIIK    | TRAF2 and NCK-interacting protein kinase isoform 4 [Homo sapiens]. |
| 342 | NP_001155033.1 | 1331 | 151 | 6.9 | 23.6 | 3q26.31    | TNIIK    | TRAF2 and NCK-interacting protein kinase isoform 3 [Homo sapiens]. |
| 343 | NP_001155036.1 | 1297 | 148 | 6.5 | 24.4 | 3q26.31    | TNIIK    | TRAF2 and NCK-interacting protein kinase isoform 6 [Homo sapiens]. |
| 344 | NP_001155035.1 | 1305 | 149 | 6.5 | 24.1 | 3q26.31    | TNIIK    | TRAF2 and NCK-interacting protein kinase isoform 5 [Homo sapiens]. |
| 345 | NP_001155032.1 | 1352 | 154 | 6.7 | 23.7 | 3q26.31    | TNIIK    | TRAF2 and NCK-interacting protein kinase isoform 2 [Homo sapiens]. |
| 346 | NP_055843.1    | 1360 | 155 | 6.7 | 23.4 | 3q26.31    | TNIIK    | TRAF2 and NCK-interacting protein kinase isoform 1 [Homo sapiens]. |
| 347 | NP_006209.2    | 1068 | 124 | 6.8 | 39.9 | 3q26.3     | PIK3CA   | phosphatidylinositol 4,5-bisphosphate 3-kinase catalytic subunit   |
| 348 | NP_150284.1    | 79   | 9   | 5.2 | 3.8  | 3q27.1     | CAMK2N2  | calcium/calmodulin-dependent protein kinase II inhibitor 2 [Homo   |

|     |                |      |     |     |      |            |         |                                                                                   |
|-----|----------------|------|-----|-----|------|------------|---------|-----------------------------------------------------------------------------------|
| 349 | NP_004434.2    | 998  | 107 | 5.7 | 37.2 | 3q21-qter  | EPHB3   | ephrin type-B receptor 3 precursor [Homo sapiens].                                |
| 350 | NP_001229246.1 | 759  | 85  | 6.5 | 22.7 | 3q27       | MAP3K13 | mitogen-activated protein kinase kinase kinase 13 isoform 2 [Homo sapiens].       |
| 351 | NP_004712.1    | 966  | 108 | 6.0 | 22.7 | 3q27       | MAP3K13 | mitogen-activated protein kinase kinase kinase 13 isoform 1 [Homo sapiens].       |
| 352 | NP_001229243.1 | 966  | 108 | 6.0 | 22.7 | 3q27       | MAP3K13 | mitogen-activated protein kinase kinase kinase 13 isoform 1 [Homo sapiens].       |
| 353 | NP_001074214.1 | 752  | 85  | 6.0 | 31.6 | 3q27.2-q27 | DGKG    | diacylglycerol kinase gamma isoform 3 [Homo sapiens].                             |
| 354 | NP_001074213.1 | 766  | 86  | 6.2 | 31.9 | 3q27.2-q27 | DGKG    | diacylglycerol kinase gamma isoform 2 [Homo sapiens].                             |
| 355 | NP_001337.2    | 791  | 89  | 6.4 | 31.2 | 3q27.2-q27 | DGKG    | diacylglycerol kinase gamma isoform 1 [Homo sapiens].                             |
| 356 | NP_001010938.1 | 1086 | 119 | 7.4 | 26.3 | 3q29       | TNK2    | activated CDC42 kinase 1 isoform 2 [Homo sapiens].                                |
| 357 | NP_005772.3    | 1038 | 115 | 6.8 | 26.2 | 3q29       | TNK2    | activated CDC42 kinase 1 isoform 1 [Homo sapiens].                                |
| 358 | NP_002568.2    | 524  | 58  | 5.6 | 36.8 | 3q29       | PAK2    | serine/threonine-protein kinase PAK 2 [Homo sapiens].                             |
| 359 | NP_001338.2    | 942  | 101 | 7.2 | 44.9 | 4p16.3     | DGKQ    | diacylglycerol kinase theta [Homo sapiens].                                       |
| 360 | NP_001156685.1 | 808  | 86  | 5.7 | 34.0 | 4p16.3     | FGFR3   | fibroblast growth factor receptor 3 isoform 3 precursor [Homo sapiens].           |
| 361 | NP_000133.1    | 806  | 86  | 5.5 | 34.3 | 4p16.3     | FGFR3   | fibroblast growth factor receptor 3 isoform 1 precursor [Homo sapiens].           |
| 362 | NP_075254.1    | 694  | 74  | 5.5 | 32.0 | 4p16.3     | FGFR3   | fibroblast growth factor receptor 3 isoform 2 precursor [Homo sapiens].           |
| 363 | NP_892027.2    | 578  | 67  | 7.6 | 26.0 | 4p16.3     | GRK4    | G protein-coupled receptor kinase 4 isoform alpha [Homo sapiens].                 |
| 364 | NP_001004057.1 | 532  | 61  | 7.4 | 27.4 | 4p16.3     | GRK4    | G protein-coupled receptor kinase 4 isoform gamma [Homo sapiens].                 |
| 365 | NP_001004056.1 | 546  | 63  | 6.5 | 26.2 | 4p16.3     | GRK4    | G protein-coupled receptor kinase 4 isoform beta [Homo sapiens].                  |
| 366 | NP_775931.3    | 504  | 53  | 6.4 | 33.5 | 4p16.3     | DOK7    | protein Dok-7 isoform 1 [Homo sapiens].                                           |
| 367 | NP_001158145.1 | 255  | 28  | 8.9 | 38.0 | 4p16.3     | DOK7    | protein Dok-7 isoform 2 [Homo sapiens].                                           |
| 368 | NP_001243825.1 | 194  | 20  | 7.1 | 24.7 | 4p16.3     | DOK7    | protein Dok-7 isoform 3 [Homo sapiens].                                           |
| 369 | NP_060871.1    | 414  | 48  | 7.5 | 29.5 | 4p16.2     | STK32B  | serine/threonine-protein kinase 32B [Homo sapiens].                               |
| 370 | NP_001092903.1 | 831  | 97  | 5.5 | 16.6 | 4p16.1     | JAKMIP1 | janus kinase and microtubule-interacting protein 1 isoform 1 [Homo sapiens].      |
| 371 | NP_653321.1    | 626  | 73  | 5.8 | 16.6 | 4p16.1     | JAKMIP1 | janus kinase and microtubule-interacting protein 1 isoform 2 [Homo sapiens].      |
| 372 | NP_060793.2    | 481  | 55  | 5.6 | 32.2 | 4p15.2     | PI4K2B  | phosphatidylinositol 4-kinase type 2-beta [Homo sapiens].                         |
| 373 | NP_003319.2    | 527  | 61  | 7.9 | 33.0 | 4p12       | TXK     | tyrosine-protein kinase TXK [Homo sapiens].                                       |
| 374 | NP_003206.2    | 631  | 74  | 8.4 | 25.0 | 4p12       | TEC     | tyrosine-protein kinase Tec [Homo sapiens].                                       |
| 375 | NP_000213.1    | 976  | 110 | 6.5 | 40.1 | 4q11-q12   | KIT     | mast/stem cell growth factor receptor Kit isoform 1 precursor [Homo sapiens].     |
| 376 | NP_001087241.1 | 972  | 109 | 6.4 | 40.2 | 4q11-q12   | KIT     | mast/stem cell growth factor receptor Kit isoform 2 precursor [Homo sapiens].     |
| 377 | NP_002244.1    | 1356 | 149 | 5.5 | 37.4 | 4q11-q12   | KDR     | vascular endothelial growth factor receptor 2 precursor [Homo sapiens].           |
| 378 | NP_872272.2    | 1015 | 110 | 6.2 | 35.8 | 4q13.1     | EPHA5   | ephrin type-A receptor 5 isoform b precursor [Homo sapiens].                      |
| 379 | NP_004430.4    | 1037 | 112 | 6.2 | 37.1 | 4q13.1     | EPHA5   | ephrin type-A receptor 5 isoform a precursor [Homo sapiens].                      |
| 380 | NP_775739.1    | 216  | 25  | 6.3 | 35.2 | 4q13.3     | MOB1B   | MOB kinase activator 1B isoform 2 [Homo sapiens].                                 |
| 381 | NP_001231696.1 | 147  | 17  | 5.0 | 34.7 | 4q13.3     | MOB1B   | MOB kinase activator 1B isoform 3 [Homo sapiens].                                 |
| 382 | NP_001231695.1 | 221  | 25  | 5.7 | 33.5 | 4q13.3     | MOB1B   | MOB kinase activator 1B isoform 1 [Homo sapiens].                                 |
| 383 | NP_003939.1    | 493  | 56  | 8.2 | 35.5 | 4q21.1     | CDKL2   | cyclin-dependent kinase-like 2 [Homo sapiens].                                    |
| 384 | NP_942595.1    | 1161 | 129 | 6.0 | 26.2 | 4q21.21    | BMP2K   | BMP-2-inducible protein kinase isoform a [Homo sapiens].                          |
| 385 | NP_060063.2    | 662  | 74  | 7.8 | 32.3 | 4q21.21    | BMP2K   | BMP-2-inducible protein kinase isoform b [Homo sapiens].                          |
| 386 | NP_001035292.1 | 311  | 36  | 8.5 | 56.9 | 4q21.21    | PAQR3   | progesterone and adipoQ receptor family member 3 [Homo sapiens].                  |
| 387 | NP_149991.2    | 553  | 61  | 5.5 | 52.1 | 4q13       | GK2     | glycerol kinase 2 [Homo sapiens].                                                 |
| 388 | NP_006250.1    | 762  | 87  | 8.5 | 28.1 | 4q13.1-q21 | PRKG2   | cGMP-dependent protein kinase 2 [Homo sapiens].                                   |
| 389 | NP_620448.1    | 464  | 53  | 6.3 | 36.2 | 4q22.1-q23 | MAPK10  | mitogen-activated protein kinase 10 isoform 2 [Homo sapiens].                     |
| 390 | NP_620446.1    | 426  | 48  | 6.4 | 35.9 | 4q22.1-q23 | MAPK10  | mitogen-activated protein kinase 10 isoform 3 [Homo sapiens].                     |
| 391 | NP_002744.1    | 422  | 49  | 7.5 | 37.7 | 4q22.1-q23 | MAPK10  | mitogen-activated protein kinase 10 isoform 1 [Homo sapiens].                     |
| 392 | NP_620447.1    | 277  | 32  | 6.1 | 35.4 | 4q22.1-q23 | MAPK10  | mitogen-activated protein kinase 10 isoform 4 [Homo sapiens].                     |
| 393 | NP_001243722.1 | 532  | 61  | 7.1 | 31.0 | 4q22-q24   | BMPR1B  | bone morphogenetic protein receptor type-1B isoform a precursor [Homo sapiens].   |
| 394 | NP_001194.1    | 502  | 56  | 7.1 | 29.7 | 4q22-q24   | BMPR1B  | bone morphogenetic protein receptor type-1B isoform b precursor [Homo sapiens].   |
| 395 | NP_001243721.1 | 502  | 56  | 7.1 | 29.7 | 4q22-q24   | BMPR1B  | bone morphogenetic protein receptor type-1B isoform b precursor [Homo sapiens].   |
| 396 | NP_001243723.1 | 502  | 56  | 7.1 | 29.7 | 4q22-q24   | BMPR1B  | bone morphogenetic protein receptor type-1B isoform b precursor [Homo sapiens].   |
| 397 | NP_001230665.1 | 117  | 13  | 8.6 | 47.0 | 4q23       | LAMTOR3 | regulator complex protein LAMTOR3 isoform 2 [Homo sapiens].                       |
| 398 | NP_068805.1    | 124  | 14  | 7.3 | 46.8 | 4q23       | LAMTOR3 | regulator complex protein LAMTOR3 isoform 1 [Homo sapiens].                       |
| 399 | NP_005434.4    | 624  | 71  | 6.4 | 34.1 | 4q24       | PAPSS1  | bifunctional 3'-phosphoadenosine 5'-phosphosulfate synthase 1 [Homo sapiens].     |
| 400 | NP_079420.3    | 1244 | 139 | 5.8 | 30.3 | 4q25       | ALPK1   | alpha-protein kinase 1 isoform 1 [Homo sapiens].                                  |
| 401 | NP_001095876.1 | 1244 | 139 | 5.8 | 30.3 | 4q25       | ALPK1   | alpha-protein kinase 1 isoform 1 [Homo sapiens].                                  |
| 402 | NP_001240813.1 | 1166 | 130 | 6.1 | 29.5 | 4q25       | ALPK1   | alpha-protein kinase 1 isoform 2 [Homo sapiens].                                  |
| 403 | NP_742126.1    | 478  | 54  | 6.7 | 31.6 | 4q26       | CAMK2D  | calcium/calmodulin-dependent protein kinase type II subunit delta [Homo sapiens]. |
| 404 | NP_001212.2    | 499  | 56  | 6.8 | 30.9 | 4q26       | CAMK2D  | calcium/calmodulin-dependent protein kinase type II subunit delta [Homo sapiens]. |
| 405 | NP_742125.1    | 478  | 54  | 6.8 | 31.6 | 4q26       | CAMK2D  | calcium/calmodulin-dependent protein kinase type II subunit delta [Homo sapiens]. |
| 406 | NP_742113.1    | 478  | 54  | 6.8 | 31.6 | 4q26       | CAMK2D  | calcium/calmodulin-dependent protein kinase type II subunit delta [Homo sapiens]. |
| 407 | NP_742112.1    | 492  | 56  | 6.7 | 30.7 | 4q26       | CAMK2D  | calcium/calmodulin-dependent protein kinase type II subunit delta [Homo sapiens]. |



|     |                |      |     |     |      |            |          |                                                                     |
|-----|----------------|------|-----|-----|------|------------|----------|---------------------------------------------------------------------|
| 408 | NP_742127.1    | 489  | 55  | 7.5 | 30.9 | 4q26       | CAMK2D   | calcium/calmodulin-dependent protein kinase type II subunit delta   |
| 409 | NP_055079.3    | 970  | 109 | 8.7 | 28.6 | 4q28       | PLK4     | serine/threonine-protein kinase PLK4 isoform 1 [Homo sapiens].      |
| 410 | NP_001177728.1 | 938  | 105 | 8.5 | 28.9 | 4q28       | PLK4     | serine/threonine-protein kinase PLK4 isoform 2 [Homo sapiens].      |
| 411 | NP_001177730.1 | 929  | 105 | 8.8 | 27.2 | 4q28       | PLK4     | serine/threonine-protein kinase PLK4 isoform 3 [Homo sapiens].      |
| 412 | NP_078881.3    | 786  | 89  | 6.8 | 25.6 | 4q31.23    | ARHGAP10 | rho GTPase-activating protein 10 [Homo sapiens].                    |
| 413 | NP_001035351.4 | 783  | 85  | 8.5 | 31.7 | 4q31.3     | DCLK2    | serine/threonine-protein kinase DCLK2 isoform b [Homo sapiens].     |
| 414 | NP_001035350.2 | 766  | 84  | 8.3 | 32.4 | 4q31.3     | DCLK2    | serine/threonine-protein kinase DCLK2 isoform a [Homo sapiens].     |
| 415 | NP_001186328.1 | 1189 | 135 | 5.3 | 22.7 | 4q33       | NEK1     | serine/threonine-protein kinase Nek1 isoform 4 [Homo sapiens].      |
| 416 | NP_001186329.1 | 1214 | 138 | 5.4 | 22.8 | 4q33       | NEK1     | serine/threonine-protein kinase Nek1 isoform 5 [Homo sapiens].      |
| 417 | NP_001186327.1 | 1242 | 141 | 5.5 | 22.7 | 4q33       | NEK1     | serine/threonine-protein kinase Nek1 isoform 3 [Homo sapiens].      |
| 418 | NP_036356.1    | 1258 | 143 | 5.6 | 22.6 | 4q33       | NEK1     | serine/threonine-protein kinase Nek1 isoform 2 [Homo sapiens].      |
| 419 | NP_001186326.1 | 1286 | 146 | 5.7 | 22.5 | 4q33       | NEK1     | serine/threonine-protein kinase Nek1 isoform 1 [Homo sapiens].      |
| 420 | NP_008961.1    | 219  | 24  | 9.9 | 20.1 | 5p15.3     | TPPP     | tubulin polymerization-promoting protein [Homo sapiens].            |
| 421 | NP_001180384.1 | 732  | 82  | 6.6 | 26.5 | 5p15.31    | NSUN2    | tRNA (cytosine(34)-C(5))-methyltransferase isoform 2 [Homo          |
| 422 | NP_060225.4    | 767  | 86  | 6.3 | 25.7 | 5p15.31    | NSUN2    | tRNA (cytosine(34)-C(5))-methyltransferase isoform 1 [Homo          |
| 423 | NP_076996.2    | 662  | 76  | 8.2 | 46.1 | 5p15.31    | FASTKD3  | FAST kinase domain-containing protein 3 [Homo sapiens].             |
| 424 | NP_001078880.1 | 442  | 49  | 8.1 | 31.4 | 5p13.2     | NADKD1   | NAD kinase domain-containing protein 1 isoform 1 [Homo sapiens].    |
| 425 | NP_694558.1    | 279  | 32  | 6.3 | 29.7 | 5p13.2     | NADKD1   | NAD kinase domain-containing protein 1 isoform 2 [Homo sapiens].    |
| 426 | NP_006242.5    | 559  | 64  | 8.0 | 30.1 | 5p12       | PRKAA1   | 5'-AMP-activated protein kinase catalytic subunit alpha-1 isoform 1 |
| 427 | NP_996790.3    | 574  | 66  | 8.2 | 29.8 | 5p12       | PRKAA1   | 5'-AMP-activated protein kinase catalytic subunit alpha-1 isoform 2 |
| 428 | NP_699192.1    | 436  | 50  | 8.4 | 28.2 | 5p12       | NIM1     | serine/threonine-protein kinase NIM1 [Homo sapiens].                |
| 429 | NP_005912.1    | 1512 | 164 | 7.5 | 33.4 | 5q11.2     | MAP3K1   | mitogen-activated protein kinase kinase kinase 1 [Homo sapiens].    |
| 430 | NP_001239155.1 | 671  | 77  | 8.2 | 31.3 | 5q12.1-q13 | PLK2     | serine/threonine-protein kinase PLK2 isoform 2 [Homo sapiens].      |
| 431 | NP_006613.2    | 685  | 78  | 8.1 | 30.1 | 5q12.1-q13 | PLK2     | serine/threonine-protein kinase PLK2 isoform 1 [Homo sapiens].      |
| 432 | NP_001158136.1 | 2623 | 284 | 8.7 | 20.2 | 5q12.3     | MAST4    | microtubule-associated serine/threonine-protein kinase 4 isoform c  |
| 433 | NP_942123.1    | 250  | 26  | 9.0 | 29.6 | 5q12.3     | MAST4    | microtubule-associated serine/threonine-protein kinase 4 isoform b  |
| 434 | NP_055998.1    | 2434 | 265 | 8.8 | 18.8 | 5q12.3     | MAST4    | microtubule-associated serine/threonine-protein kinase 4 isoform a  |
| 435 | NP_852664.1    | 724  | 84  | 5.8 | 24.2 | 5q13.1     | PIK3R1   | phosphatidylinositol 3-kinase regulatory subunit alpha isoform 1    |
| 436 | NP_852665.1    | 424  | 50  | 7.4 | 14.2 | 5q13.1     | PIK3R1   | phosphatidylinositol 3-kinase regulatory subunit alpha isoform 3    |
| 437 | NP_852556.2    | 454  | 53  | 6.0 | 15.4 | 5q13.1     | PIK3R1   | phosphatidylinositol 3-kinase regulatory subunit alpha isoform 2    |
| 438 | NP_001229395.1 | 361  | 43  | 8.1 | 15.5 | 5q13.1     | PIK3R1   | phosphatidylinositol 3-kinase regulatory subunit alpha isoform 4    |
| 439 | NP_001790.1    | 346  | 39  | 8.6 | 40.5 | 5q12.1     | CDK7     | cyclin-dependent kinase 7 [Homo sapiens].                           |
| 440 | NP_001015891.1 | 169  | 20  | 4.5 | 21.3 | 5q11.2-q13 | TAF9     | adenylate kinase isoenzyme 6 isoform c [Homo sapiens].              |
| 441 | NP_057367.1    | 172  | 20  | 4.3 | 25.0 | 5q11.2-q13 | TAF9     | adenylate kinase isoenzyme 6 isoform b [Homo sapiens].              |
| 442 | NP_001015892.1 | 264  | 29  | 9.0 | 31.8 | 5q11.2-q13 | TAF9     | adenylate kinase isoenzyme 6 isoform a [Homo sapiens].              |
| 443 | NP_003178.1    | 264  | 29  | 9.0 | 31.8 | 5q11.2-q13 | TAF9     | adenylate kinase isoenzyme 6 isoform a [Homo sapiens].              |
| 444 | NP_001816.2    | 419  | 43  | 7.2 | 27.9 | 5q13.3     | CKMT2    | creatine kinase S-type, mitochondrial precursor [Homo sapiens].     |
| 445 | NP_001093205.1 | 419  | 43  | 7.2 | 27.9 | 5q13.3     | CKMT2    | creatine kinase S-type, mitochondrial precursor [Homo sapiens].     |
| 446 | NP_001093206.1 | 419  | 43  | 7.2 | 27.9 | 5q13.3     | CKMT2    | creatine kinase S-type, mitochondrial precursor [Homo sapiens].     |
| 447 | NP_001230.1    | 323  | 38  | 6.8 | 39.0 | 5q13.3-q14 | CCNH     | cyclin-H isoform 1 [Homo sapiens].                                  |
| 448 | NP_001186118.1 | 270  | 31  | 6.0 | 43.7 | 5q13.3-q14 | CCNH     | cyclin-H isoform 2 [Homo sapiens].                                  |
| 449 | NP_060813.2    | 552  | 63  | 5.6 | 21.2 | 5q15       | RIOK2    | serine/threonine-protein kinase RIO2 isoform 1 [Homo sapiens].      |
| 450 | NP_001153221.1 | 474  | 55  | 5.1 | 21.3 | 5q15       | RIOK2    | serine/threonine-protein kinase RIO2 isoform 2 [Homo sapiens].      |
| 451 | NP_056031.2    | 1222 | 138 | 7.9 | 29.8 | 5q21.1     | PPIP5K2  | inositol hexakisphosphate and diphosphoinositol-pentakisphosphate   |
| 452 | NP_001953.1    | 228  | 24  | 6.1 | 28.8 | 5q21       | EFNA5    | ephrin-A5 precursor [Homo sapiens].                                 |
| 453 | NP_005237.2    | 822  | 95  | 6.7 | 26.6 | 5q21       | FER      | tyrosine-protein kinase Fer [Homo sapiens].                         |
| 454 | NP_001735.1    | 473  | 52  | 5.5 | 38.7 | 5q21.3     | CAMK4    | calcium/calmodulin-dependent protein kinase type IV [Homo sapiens]. |
| 455 | NP_114417.1    | 367  | 42  | 7.6 | 30.2 | 5q22.2     | TSSK1B   | testis-specific serine/threonine-protein kinase 1 [Homo sapiens].   |
| 456 | NP_001257501.1 | 424  | 49  | 9.4 | 23.1 | 5q23       | CSNK1G3  | casein kinase I isoform gamma-3 isoform 5 [Homo sapiens].           |
| 457 | NP_001038188.1 | 455  | 52  | 9.5 | 23.1 | 5q23       | CSNK1G3  | casein kinase I isoform gamma-3 isoform 4 [Homo sapiens].           |
| 458 | NP_004375.2    | 447  | 51  | 9.5 | 23.0 | 5q23       | CSNK1G3  | casein kinase I isoform gamma-3 isoform 1 [Homo sapiens].           |
| 459 | NP_001026982.1 | 423  | 49  | 9.5 | 23.6 | 5q23       | CSNK1G3  | casein kinase I isoform gamma-3 isoform 2 [Homo sapiens].           |
| 460 | NP_001257502.1 | 348  | 41  | 8.9 | 23.6 | 5q23       | CSNK1G3  | casein kinase I isoform gamma-3 isoform 6 [Homo sapiens].           |
| 461 | NP_001257503.1 | 311  | 36  | 8.4 | 22.8 | 5q23       | CSNK1G3  | casein kinase I isoform gamma-3 isoform 7 [Homo sapiens].           |
| 462 | NP_005331.1    | 126  | 14  | 6.5 | 37.3 | 5q31.2     | HINT1    | histidine triad nucleotide-binding protein 1 [Homo sapiens].        |
| 463 | NP_064625.1    | 84   | 9   | 8.5 | 33.3 | 5q31.1     | CDC42SE2 | CDC42 small effector protein 2 [Homo sapiens].                      |
| 464 | NP_001033791.1 | 84   | 9   | 8.5 | 33.3 | 5q31.1     | CDC42SE2 | CDC42 small effector protein 2 [Homo sapiens].                      |
| 465 | NP_001107047.1 | 592  | 68  | 9.7 | 27.7 | 5q31       | CDKL3    | cyclin-dependent kinase-like 3 isoform 1 [Homo sapiens].            |
| 466 | NP_057592.2    | 455  | 52  | 9.3 | 33.0 | 5q31       | CDKL3    | cyclin-dependent kinase-like 3 isoform 2 [Homo sapiens].            |

|     |                |      |     |      |      |            |          |                                                                                   |
|-----|----------------|------|-----|------|------|------------|----------|-----------------------------------------------------------------------------------|
| 467 | NP_003542.1    | 212  | 24  | 5.9  | 38.2 | 5q31       | NME5     | nucleoside diphosphate kinase homolog 5 [Homo sapiens].                           |
| 468 | NP_055886.1    | 814  | 92  | 6.2  | 31.2 | 5q31       | ARHGAP26 | rho GTPase-activating protein 26 isoform a [Homo sapiens].                        |
| 469 | NP_001129080.1 | 759  | 86  | 6.2  | 28.3 | 5q31       | ARHGAP26 | rho GTPase-activating protein 26 isoform b [Homo sapiens].                        |
| 470 | NP_001106195.1 | 396  | 46  | 7.0  | 29.0 | 5q32       | STK32A   | serine/threonine-protein kinase 32A isoform 1 [Homo sapiens].                     |
| 471 | NP_659438.1    | 166  | 20  | 5.8  | 30.1 | 5q32       | STK32A   | serine/threonine-protein kinase 32A isoform 2 [Homo sapiens].                     |
| 472 | NP_055605.2    | 810  | 95  | 5.8  | 14.4 | 5q32       | JAKMIP2  | janus kinase and microtubule-interacting protein 2 isoform 3 [Homo sapiens].      |
| 473 | NP_001257863.1 | 799  | 94  | 5.7  | 16.1 | 5q32       | JAKMIP2  | janus kinase and microtubule-interacting protein 2 isoform 2 [Homo sapiens].      |
| 474 | NP_001257870.1 | 820  | 96  | 5.7  | 15.9 | 5q32       | JAKMIP2  | janus kinase and microtubule-interacting protein 2 [Homo sapiens].                |
| 475 | NP_001883.4    | 337  | 39  | 9.9  | 32.0 | 5q32       | CSNK1A1  | casein kinase I isoform alpha isoform 2 [Homo sapiens].                           |
| 476 | NP_001020276.1 | 365  | 42  | 9.9  | 30.1 | 5q32       | CSNK1A1  | casein kinase I isoform alpha isoform 1 [Homo sapiens].                           |
| 477 | NP_741960.1    | 478  | 54  | 6.6  | 33.1 | 5q32       | CAMK2A   | calcium/calmodulin-dependent protein kinase type II subunit alpha                 |
| 478 | NP_057065.2    | 489  | 55  | 7.1  | 32.3 | 5q32       | CAMK2A   | calcium/calmodulin-dependent protein kinase type II subunit alpha                 |
| 479 | NP_005537.3    | 620  | 72  | 7.4  | 32.3 | 5q31-q32   | ITK      | tyrosine-protein kinase ITK/TSK [Homo sapiens].                                   |
| 480 | NP_078870.1    | 370  | 41  | 6.1  | 43.5 | 5q34       | PANK3    | pantothenate kinase 3 [Homo sapiens].                                             |
| 481 | NP_005981.3    | 968  | 112 | 6.5  | 18.9 | 5q35.1     | STK10    | serine/threonine-protein kinase 10 [Homo sapiens].                                |
| 482 | NP_001017995.1 | 911  | 102 | 8.9  | 19.2 | 5q35.1     | SH3PXD2B | SH3 and PX domain-containing protein 2B [Homo sapiens].                           |
| 483 | NP_004408.1    | 367  | 39  | 6.8  | 53.4 | 5q34       | DUSP1    | dual specificity protein phosphatase 1 [Homo sapiens].                            |
| 484 | NP_002106.2    | 923  | 99  | 5.1  | 53.2 | 5q35.2     | HK3      | hexokinase-3 [Homo sapiens].                                                      |
| 485 | NP_002002.3    | 802  | 86  | 6.4  | 41.4 | 5q35.1-qte | FGFR4    | fibroblast growth factor receptor 4 isoform 1 precursor [Homo sapiens].           |
| 486 | NP_998812.1    | 802  | 86  | 6.4  | 41.4 | 5q35.1-qte | FGFR4    | fibroblast growth factor receptor 4 isoform 1 precursor [Homo sapiens].           |
| 487 | NP_075252.2    | 762  | 81  | 6.3  | 41.3 | 5q35.1-qte | FGFR4    | fibroblast growth factor receptor 4 isoform 2 precursor [Homo sapiens].           |
| 488 | NP_002073.2    | 589  | 67  | 8.5  | 28.7 | 5q35       | GRK6     | G protein-coupled receptor kinase 6 isoform B [Homo sapiens].                     |
| 489 | NP_001004106.1 | 576  | 66  | 7.9  | 28.5 | 5q35       | GRK6     | G protein-coupled receptor kinase 6 isoform A [Homo sapiens].                     |
| 490 | NP_001004105.1 | 560  | 64  | 8.4  | 29.3 | 5q35       | GRK6     | G protein-coupled receptor kinase 6 isoform C [Homo sapiens].                     |
| 491 | NP_001138348.1 | 228  | 25  | 8.2  | 30.3 | 5q35.3     | DOK3     | docking protein 3 isoform 3 [Homo sapiens].                                       |
| 492 | NP_001138347.1 | 330  | 36  | 8.6  | 32.7 | 5q35.3     | DOK3     | docking protein 3 isoform 2 [Homo sapiens].                                       |
| 493 | NP_079148.2    | 496  | 53  | 7.6  | 27.8 | 5q35.3     | DOK3     | docking protein 3 isoform 1 [Homo sapiens].                                       |
| 494 | NP_065717.1    | 481  | 57  | 8.7  | 24.7 | 5q35       | CLK4     | dual specificity protein kinase CLK4 [Homo sapiens].                              |
| 495 | NP_002743.3    | 424  | 48  | 5.3  | 38.0 | 5q35       | MAPK9    | mitogen-activated protein kinase 9 isoform JNK2 alpha2 [Homo sapiens].            |
| 496 | NP_620709.1    | 424  | 48  | 5.4  | 37.5 | 5q35       | MAPK9    | mitogen-activated protein kinase 9 isoform JNK2 beta2 [Homo sapiens].             |
| 497 | NP_620707.1    | 382  | 44  | 6.0  | 40.1 | 5q35       | MAPK9    | mitogen-activated protein kinase 9 isoform JNK2 alpha1 [Homo sapiens].            |
| 498 | NP_620708.1    | 382  | 44  | 6.1  | 39.5 | 5q35       | MAPK9    | mitogen-activated protein kinase 9 isoform JNK2 beta1 [Homo sapiens].             |
| 499 | NP_001128516.1 | 242  | 27  | 8.2  | 56.6 | 5q35       | MAPK9    | mitogen-activated protein kinase 9 isoform JNK2 gamma [Homo sapiens].             |
| 500 | NP_891555.2    | 1363 | 150 | 5.8  | 37.6 | 5q35.3     | FLT4     | vascular endothelial growth factor receptor 3 isoform 1 precursor [Homo sapiens]. |
| 501 | NP_002011.2    | 1298 | 143 | 5.8  | 39.2 | 5q35.3     | FLT4     | vascular endothelial growth factor receptor 3 isoform 2 precursor [Homo sapiens]. |
| 502 | NP_006089.1    | 317  | 35  | 7.5  | 35.6 | 5q35.3     | GNB2L1   | guanine nucleotide-binding protein subunit beta-2-like 1 [Homo sapiens].          |
| 503 | NP_064570.1    | 184  | 21  | 8.1  | 35.9 | 6p25.3     | DUSP22   | dual specificity protein phosphatase 22 [Homo sapiens].                           |
| 504 | NP_001012418.2 | 388  | 45  | 5.9  | 30.7 | 6p25.2     | MYLK4    | myosin light chain kinase family member 4 [Homo sapiens].                         |
| 505 | NP_003795.2    | 671  | 76  | 5.9  | 24.9 | 6p25.2     | RIPK1    | receptor-interacting serine/threonine-protein kinase 1 [Homo sapiens].            |
| 506 | NP_003904.3    | 1007 | 117 | 10.7 | 16.9 | 6p25.2     | PRPF4B   | serine/threonine-protein kinase PRP4 homolog [Homo sapiens].                      |
| 507 | NP_113668.2    | 568  | 66  | 5.8  | 20.6 | 6p24.3     | RIOK1    | serine/threonine-protein kinase RIO1 isoform 1 [Homo sapiens].                    |
| 508 | NP_694550.1    | 327  | 38  | 6.7  | 23.9 | 6p24.3     | RIOK1    | serine/threonine-protein kinase RIO1 isoform 2 [Homo sapiens].                    |
| 509 | NP_001229314.1 | 583  | 66  | 10.0 | 25.4 | 6p24       | MAK      | serine/threonine-protein kinase MAK isoform 2 [Homo sapiens].                     |
| 510 | NP_005897.1    | 623  | 71  | 10.0 | 25.2 | 6p24       | MAK      | serine/threonine-protein kinase MAK isoform 1 [Homo sapiens].                     |
| 511 | NP_001229886.1 | 648  | 73  | 9.9  | 24.7 | 6p24       | MAK      | serine/threonine-protein kinase MAK isoform 3 [Homo sapiens].                     |
| 512 | NP_001189452.1 | 894  | 95  | 6.2  | 34.3 | 6p21.3     | DDR1     | epithelial discoidin domain-containing receptor 1 isoform 6 [Homo sapiens].       |
| 513 | NP_054700.2    | 919  | 100 | 6.6  | 35.4 | 6p21.3     | DDR1     | epithelial discoidin domain-containing receptor 1 isoform 3 [Homo sapiens].       |
| 514 | NP_054699.2    | 913  | 99  | 6.6  | 34.9 | 6p21.3     | DDR1     | epithelial discoidin domain-containing receptor 1 isoform 2 [Homo sapiens].       |
| 515 | NP_001945.3    | 876  | 95  | 6.2  | 34.3 | 6p21.3     | DDR1     | epithelial discoidin domain-containing receptor 1 isoform 1 [Homo sapiens].       |
| 516 | NP_001189451.1 | 767  | 84  | 6.8  | 37.3 | 6p21.3     | DDR1     | epithelial discoidin domain-containing receptor 1 isoform 5 [Homo sapiens].       |
| 517 | NP_001189450.1 | 508  | 54  | 7.2  | 31.8 | 6p21.3     | DDR1     | epithelial discoidin domain-containing receptor 1 isoform 4 [Homo sapiens].       |
| 518 | NP_001311.3    | 215  | 25  | 5.2  | 29.3 | 6p21.3     | CSNK2B   | casein kinase II subunit beta [Homo sapiens].                                     |
| 519 | NP_115830.1    | 368  | 41  | 10.1 | 37.2 | 6p21.3     | STK19    | serine/threonine-protein kinase 19 isoform 2 [Homo sapiens].                      |
| 520 | NP_004188.1    | 364  | 40  | 10.3 | 35.7 | 6p21.3     | STK19    | serine/threonine-protein kinase 19 isoform 1 [Homo sapiens].                      |
| 521 | NP_473452.2    | 410  | 46  | 8.0  | 26.3 | 6p21.31    | IP6K3    | inositol hexakisphosphate kinase 3 [Homo sapiens].                                |
| 522 | NP_001136355.1 | 410  | 46  | 8.0  | 26.3 | 6p21.31    | IP6K3    | inositol hexakisphosphate kinase 3 [Homo sapiens].                                |
| 523 | NP_065855.1    | 444  | 51  | 5.0  | 6.5  | 6p21.3     | PACSL1   | protein kinase C and casein kinase substrate in neurons protein 1 [Homo sapiens]. |
| 524 | NP_001186512.1 | 444  | 51  | 5.0  | 6.5  | 6p21.3     | PACSL1   | protein kinase C and casein kinase substrate in neurons protein 1 [Homo sapiens]. |
| 525 | NP_003128.3    | 655  | 74  | 5.8  | 26.7 | 6p21.31    | SRPK1    | SRSF protein kinase 1 [Homo sapiens].                                             |

|     |                |      |     |      |      |            |          |                                                                              |
|-----|----------------|------|-----|------|------|------------|----------|------------------------------------------------------------------------------|
| 526 | NP_620581.1    | 360  | 41  | 5.4  | 39.4 | 6p21.3-p21 | MAPK14   | mitogen-activated protein kinase 14 isoform 2 [Homo sapiens].                |
| 527 | NP_001306.1    | 360  | 41  | 5.5  | 37.2 | 6p21.3-p21 | MAPK14   | mitogen-activated protein kinase 14 isoform 1 [Homo sapiens].                |
| 528 | NP_620583.1    | 307  | 35  | 8.9  | 41.7 | 6p21.3-p21 | MAPK14   | mitogen-activated protein kinase 14 isoform 4 [Homo sapiens].                |
| 529 | NP_620582.1    | 297  | 34  | 8.2  | 42.1 | 6p21.3-p21 | MAPK14   | mitogen-activated protein kinase 14 isoform 3 [Homo sapiens].                |
| 530 | NP_002745.1    | 365  | 42  | 8.6  | 32.6 | 6p21.31    | MAPK13   | mitogen-activated protein kinase 13 [Homo sapiens].                          |
| 531 | NP_009202.1    | 465  | 54  | 6.7  | 29.7 | 6p21       | STK38    | serine/threonine-protein kinase 38 [Homo sapiens].                           |
| 532 | NP_000380.1    | 164  | 18  | 8.4  | 17.1 | 6p21.2     | CDKN1A   | cyclin-dependent kinase inhibitor 1 [Homo sapiens].                          |
| 533 | NP_510867.1    | 164  | 18  | 8.4  | 17.1 | 6p21.2     | CDKN1A   | cyclin-dependent kinase inhibitor 1 [Homo sapiens].                          |
| 534 | NP_001207706.1 | 164  | 18  | 8.4  | 17.1 | 6p21.2     | CDKN1A   | cyclin-dependent kinase inhibitor 1 [Homo sapiens].                          |
| 535 | NP_001207707.1 | 164  | 18  | 8.4  | 17.1 | 6p21.2     | CDKN1A   | cyclin-dependent kinase inhibitor 1 [Homo sapiens].                          |
| 536 | NP_001230115.1 | 404  | 45  | 6.5  | 35.1 | 6p21.2     | PIM1     | serine/threonine-protein kinase pim-1 isoform 1 [Homo sapiens].              |
| 537 | NP_002639.1    | 313  | 36  | 5.7  | 39.9 | 6p21.2     | PIM1     | serine/threonine-protein kinase pim-1 isoform 2 [Homo sapiens].              |
| 538 | NP_002812.2    | 1070 | 115 | 6.4  | 32.1 | 6p21.1-p12 | PTK7     | inactive tyrosine-protein kinase 7 isoform a precursor [Homo sapiens].       |
| 539 | NP_690621.1    | 1014 | 109 | 6.3  | 31.9 | 6p21.1-p12 | PTK7     | inactive tyrosine-protein kinase 7 isoform d precursor [Homo sapiens].       |
| 540 | NP_690619.1    | 1030 | 111 | 6.3  | 33.3 | 6p21.1-p12 | PTK7     | inactive tyrosine-protein kinase 7 isoform b precursor [Homo sapiens].       |
| 541 | NP_690620.1    | 940  | 100 | 6.4  | 34.1 | 6p21.1-p12 | PTK7     | inactive tyrosine-protein kinase 7 isoform c precursor [Homo sapiens].       |
| 542 | NP_001257327.1 | 1078 | 119 | 6.5  | 31.9 | 6p21.1-p12 | PTK7     | inactive tyrosine-protein kinase 7 isoform e [Homo sapiens].                 |
| 543 | NP_115927.1    | 1321 | 143 | 5.4  | 21.8 | 6p21.1     | TTBK1    | tau-tubulin kinase 1 [Homo sapiens].                                         |
| 544 | NP_620061.2    | 417  | 45  | 8.7  | 49.9 | 6p12.3     | PGK2     | phosphoglycerate kinase 2 [Homo sapiens].                                    |
| 545 | NP_055735.1    | 632  | 71  | 10.1 | 22.3 | 6p12.1     | ICK      | serine/threonine-protein kinase ICK [Homo sapiens].                          |
| 546 | NP_057597.2    | 632  | 71  | 10.1 | 22.3 | 6p12.1     | ICK      | serine/threonine-protein kinase ICK [Homo sapiens].                          |
| 547 | NP_001010844.1 | 260  | 29  | 9.2  | 31.5 | 6q14-q15   | IRAK1BP1 | interleukin-1 receptor-associated kinase 1-binding protein 1 [Homo sapiens]. |
| 548 | NP_003309.2    | 857  | 97  | 8.1  | 25.0 | 6q13-q21   | TTK      | dual specificity protein kinase TTK isoform 1 [Homo sapiens].                |
| 549 | NP_001160163.1 | 856  | 97  | 8.1  | 25.0 | 6q13-q21   | TTK      | dual specificity protein kinase TTK isoform 2 [Homo sapiens].                |
| 550 | NP_056340.2    | 1353 | 151 | 7.5  | 37.5 | 6q14.1     | IBTK     | inhibitor of Bruton tyrosine kinase [Homo sapiens].                          |
| 551 | NP_003179.1    | 579  | 64  | 6.2  | 29.4 | 6q15       | MAP3K7   | mitogen-activated protein kinase kinase kinase 7 isoform A [Homo sapiens].   |
| 552 | NP_663304.1    | 606  | 67  | 6.7  | 30.7 | 6q15       | MAP3K7   | mitogen-activated protein kinase kinase kinase 7 isoform B [Homo sapiens].   |
| 553 | NP_663306.1    | 491  | 54  | 6.2  | 32.6 | 6q15       | MAP3K7   | mitogen-activated protein kinase kinase kinase 7 isoform D [Homo sapiens].   |
| 554 | NP_663305.1    | 518  | 57  | 6.9  | 34.0 | 6q15       | MAP3K7   | mitogen-activated protein kinase kinase kinase 7 isoform C [Homo sapiens].   |
| 555 | NP_004431.1    | 998  | 112 | 5.5  | 35.8 | 6q16.1     | EPHA7    | ephrin type-A receptor 7 precursor [Homo sapiens].                           |
| 556 | NP_001138600.2 | 1911 | 221 | 4.8  | 29.5 | 6q21       | AKD1     | adenylate kinase domain-containing protein 1 isoform 1 [Homo sapiens].       |
| 557 | NP_659462.1    | 421  | 49  | 4.8  | 37.5 | 6q21       | AKD1     | adenylate kinase domain-containing protein 1 isoform 2 [Homo sapiens].       |
| 558 | NP_055891.1    | 502  | 57  | 8.7  | 27.9 | 6q21       | CDK19    | cyclin-dependent kinase 19 [Homo sapiens].                                   |
| 559 | NP_694593.1    | 482  | 55  | 5.8  | 25.9 | 6q21       | FYN      | tyrosine-protein kinase Fyn isoform c [Homo sapiens].                        |
| 560 | NP_694592.1    | 534  | 60  | 5.8  | 27.7 | 6q21       | FYN      | tyrosine-protein kinase Fyn isoform b [Homo sapiens].                        |
| 561 | NP_002028.1    | 537  | 61  | 6.2  | 26.3 | 6q21       | FYN      | tyrosine-protein kinase Fyn isoform a [Homo sapiens].                        |
| 562 | NP_002347.5    | 332  | 32  | 4.3  | 19.3 | 6q22.2     | MARCKS   | myristoylated alanine-rich C-kinase substrate [Homo sapiens].                |
| 563 | NP_002022.1    | 505  | 58  | 6.2  | 29.3 | 6q21-q22.3 | FRK      | tyrosine-protein kinase FRK [Homo sapiens].                                  |
| 564 | NP_002935.2    | 2347 | 260 | 5.6  | 43.5 | 6q22       | ROS1     | proto-oncogene tyrosine-protein kinase ROS precursor [Homo sapiens].         |
| 565 | NP_001257323.1 | 85   | 9   | 4.6  | 17.6 | 6q22.31    | PKIB     | cAMP-dependent protein kinase inhibitor beta isoform 2 [Homo sapiens].       |
| 566 | NP_001257324.1 | 85   | 9   | 4.6  | 17.6 | 6q22.31    | PKIB     | cAMP-dependent protein kinase inhibitor beta isoform 2 [Homo sapiens].       |
| 567 | NP_861460.1    | 78   | 8   | 4.6  | 19.2 | 6q22.31    | PKIB     | cAMP-dependent protein kinase inhibitor beta isoform 1 [Homo sapiens].       |
| 568 | NP_861459.1    | 78   | 8   | 4.6  | 19.2 | 6q22.31    | PKIB     | cAMP-dependent protein kinase inhibitor beta isoform 1 [Homo sapiens].       |
| 569 | NP_115860.1    | 78   | 8   | 4.6  | 19.2 | 6q22.31    | PKIB     | cAMP-dependent protein kinase inhibitor beta isoform 1 [Homo sapiens].       |
| 570 | NP_001257322.1 | 78   | 8   | 4.6  | 19.2 | 6q22.31    | PKIB     | cAMP-dependent protein kinase inhibitor beta isoform 1 [Homo sapiens].       |
| 571 | NP_057461.2    | 348  | 40  | 5.8  | 31.3 | 6q23       | AKAP7    | A-kinase anchor protein 7 isoform gamma isoform gamma [Homo sapiens].        |
| 572 | NP_619539.1    | 104  | 11  | 4.7  | 13.5 | 6q23       | AKAP7    | A-kinase anchor protein 7 isoform gamma isoform beta [Homo sapiens].         |
| 573 | NP_004833.1    | 81   | 9   | 4.8  | 16.0 | 6q23       | AKAP7    | A-kinase anchor protein 7 isoform gamma isoform alpha [Homo sapiens].        |
| 574 | NP_001137148.1 | 526  | 60  | 7.9  | 29.1 | 6q23       | SGK1     | serine/threonine-protein kinase Sgk1 isoform 2 [Homo sapiens].               |
| 575 | NP_001137149.1 | 459  | 52  | 8.6  | 29.8 | 6q23       | SGK1     | serine/threonine-protein kinase Sgk1 isoform 3 [Homo sapiens].               |
| 576 | NP_001137150.1 | 445  | 51  | 9.0  | 32.6 | 6q23       | SGK1     | serine/threonine-protein kinase Sgk1 isoform 4 [Homo sapiens].               |
| 577 | NP_005618.2    | 431  | 49  | 8.7  | 33.2 | 6q23       | SGK1     | serine/threonine-protein kinase Sgk1 isoform 1 [Homo sapiens].               |
| 578 | NP_005914.1    | 1374 | 155 | 5.4  | 37.2 | 6q22.33    | MAP3K5   | mitogen-activated protein kinase kinase kinase 5 [Homo sapiens].             |
| 579 | NP_055908.1    | 693  | 76  | 8.5  | 20.3 | 6q25.1     | TAB2     | TGF-beta-activated kinase 1 and MAP3K7-binding protein 2 [Homo sapiens].     |
| 580 | NP_004681.1    | 1130 | 127 | 8.9  | 20.5 | 6q25.1     | LATS1    | serine/threonine-protein kinase LATS1 isoform 1 [Homo sapiens].              |
| 581 | NP_001257448.1 | 690  | 76  | 10.2 | 16.5 | 6q25.1     | LATS1    | serine/threonine-protein kinase LATS1 isoform 2 [Homo sapiens].              |
| 582 | NP_112211.1    | 165  | 18  | 4.9  | 20.0 | 6q24.3-q25 | PPP1R14C | protein phosphatase 1 regulatory subunit 14C [Homo sapiens].                 |
| 583 | NP_005091.2    | 1782 | 191 | 4.2  | 15.3 | 6q24-q25   | AKAP12   | A-kinase anchor protein 12 isoform 1 [Homo sapiens].                         |
| 584 | NP_653080.1    | 1684 | 182 | 4.3  | 15.6 | 6q24-q25   | AKAP12   | A-kinase anchor protein 12 isoform 2 [Homo sapiens].                         |

|     |                |      |     |      |      |            |         |                                                                              |
|-----|----------------|------|-----|------|------|------------|---------|------------------------------------------------------------------------------|
| 585 | NP_775786.2    | 555  | 62  | 8.9  | 27.4 | 6q25.2     | CNKSR3  | connector enhancer of kinase suppressor of ras 3 [Homo sapiens].             |
| 586 | NP_005913.2    | 1608 | 182 | 5.9  | 31.0 | 6q26       | MAP3K4  | mitogen-activated protein kinase kinase kinase 4 isoform a [Homo sapiens].   |
| 587 | NP_006715.2    | 1558 | 177 | 5.8  | 30.7 | 6q26       | MAP3K4  | mitogen-activated protein kinase kinase kinase 4 isoform b [Homo sapiens].   |
| 588 | NP_001006933.1 | 741  | 84  | 6.2  | 35.2 | 6q27       | RPS6KA2 | ribosomal protein S6 kinase alpha-2 isoform b [Homo sapiens].                |
| 589 | NP_066958.2    | 733  | 83  | 8.9  | 35.7 | 6q27       | RPS6KA2 | ribosomal protein S6 kinase alpha-2 isoform a [Homo sapiens].                |
| 590 | NP_064608.2    | 584  | 64  | 6.8  | 30.2 | 7p22.3     | FAM20C  | extracellular serine/threonine protein kinase Fam20C precursor               |
| 591 | NP_002726.1    | 381  | 43  | 5.4  | 30.7 | 7p22       | PRKAR1B | cAMP-dependent protein kinase type I-beta regulatory subunit [Homo sapiens]. |
| 592 | NP_001158230.1 | 381  | 43  | 5.4  | 30.7 | 7p22       | PRKAR1B | cAMP-dependent protein kinase type I-beta regulatory subunit [Homo sapiens]. |
| 593 | NP_001158231.1 | 381  | 43  | 5.4  | 30.7 | 7p22       | PRKAR1B | cAMP-dependent protein kinase type I-beta regulatory subunit [Homo sapiens]. |
| 594 | NP_001158232.1 | 381  | 43  | 5.4  | 30.7 | 7p22       | PRKAR1B | cAMP-dependent protein kinase type I-beta regulatory subunit [Homo sapiens]. |
| 595 | NP_001158234.1 | 381  | 43  | 5.4  | 30.7 | 7p22       | PRKAR1B | cAMP-dependent protein kinase type I-beta regulatory subunit [Homo sapiens]. |
| 596 | NP_001158233.1 | 381  | 43  | 5.4  | 30.7 | 7p22       | PRKAR1B | cAMP-dependent protein kinase type I-beta regulatory subunit [Homo sapiens]. |
| 597 | NP_001127807.1 | 629  | 71  | 5.6  | 32.9 | 7p22       | EIF2AK1 | eukaryotic translation initiation factor 2-alpha kinase 1 isoform b          |
| 598 | NP_055228.2    | 630  | 71  | 5.6  | 33.0 | 7p22       | EIF2AK1 | eukaryotic translation initiation factor 2-alpha kinase 1 isoform a          |
| 599 | NP_004071.1    | 804  | 91  | 7.7  | 32.5 | 7p21.2     | DGKB    | diacylglycerol kinase beta isoform 1 [Homo sapiens].                         |
| 600 | NP_663733.1    | 773  | 87  | 6.8  | 32.6 | 7p21.2     | DGKB    | diacylglycerol kinase beta isoform 2 [Homo sapiens].                         |
| 601 | NP_787082.1    | 318  | 35  | 5.9  | 58.8 | 7p21.1     | PRPS1L1 | ribose-phosphate pyrophosphokinase 3 [Homo sapiens].                         |
| 602 | NP_113602.2    | 1019 | 116 | 4.9  | 32.2 | 7p15.3     | STK31   | serine/threonine-protein kinase 31 isoform a [Homo sapiens].                 |
| 603 | NP_001247434.1 | 996  | 113 | 4.9  | 32.7 | 7p15.3     | STK31   | serine/threonine-protein kinase 31 isoform c [Homo sapiens].                 |
| 604 | NP_116562.2    | 996  | 113 | 4.9  | 32.0 | 7p15.3     | STK31   | serine/threonine-protein kinase 31 isoform b [Homo sapiens].                 |
| 605 | NP_001247433.1 | 996  | 113 | 4.9  | 32.0 | 7p15.3     | STK31   | serine/threonine-protein kinase 31 isoform b [Homo sapiens].                 |
| 606 | NP_976033.1    | 221  | 26  | 10.2 | 3.6  | 7p14.3     | RP9     | retinitis pigmentosa 9 protein [Homo sapiens].                               |
| 607 | NP_003709.3    | 1512 | 165 | 10.1 | 21.0 | 7p13       | CDK13   | cyclin-dependent kinase 13 isoform 1 [Homo sapiens].                         |
| 608 | NP_112557.2    | 1452 | 158 | 10.1 | 19.9 | 7p13       | CDK13   | cyclin-dependent kinase 13 isoform 2 [Homo sapiens].                         |
| 609 | NP_004751.2    | 414  | 47  | 4.9  | 31.9 | 7p13       | STK17A  | serine/threonine-protein kinase 17A [Homo sapiens].                          |
| 610 | NP_000153.1    | 465  | 52  | 5.0  | 34.6 | 7p15.3-p15 | GCK     | glucokinase isoform 1 [Homo sapiens].                                        |
| 611 | NP_277042.1    | 466  | 52  | 4.9  | 36.3 | 7p15.3-p15 | GCK     | glucokinase isoform 2 [Homo sapiens].                                        |
| 612 | NP_277043.1    | 464  | 52  | 5.0  | 34.7 | 7p15.3-p15 | GCK     | glucokinase isoform 3 [Homo sapiens].                                        |
| 613 | NP_742081.1    | 449  | 51  | 7.0  | 35.9 | 7p14.3-p14 | CAMK2B  | calcium/calmodulin-dependent protein kinase type II subunit beta             |
| 614 | NP_742077.1    | 517  | 58  | 6.9  | 32.5 | 7p14.3-p14 | CAMK2B  | calcium/calmodulin-dependent protein kinase type II subunit beta             |
| 615 | NP_742080.1    | 479  | 54  | 6.7  | 34.2 | 7p14.3-p14 | CAMK2B  | calcium/calmodulin-dependent protein kinase type II subunit beta             |
| 616 | NP_742078.1    | 503  | 56  | 7.0  | 33.4 | 7p14.3-p14 | CAMK2B  | calcium/calmodulin-dependent protein kinase type II subunit beta             |
| 617 | NP_742076.1    | 518  | 58  | 6.9  | 33.0 | 7p14.3-p14 | CAMK2B  | calcium/calmodulin-dependent protein kinase type II subunit beta             |
| 618 | NP_742079.1    | 492  | 55  | 7.1  | 35.0 | 7p14.3-p14 | CAMK2B  | calcium/calmodulin-dependent protein kinase type II subunit beta             |
| 619 | NP_742075.1    | 542  | 60  | 6.9  | 34.1 | 7p14.3-p14 | CAMK2B  | calcium/calmodulin-dependent protein kinase type II subunit beta             |
| 620 | NP_001211.3    | 666  | 73  | 6.9  | 32.7 | 7p14.3-p14 | CAMK2B  | calcium/calmodulin-dependent protein kinase type II subunit beta             |
| 621 | NP_001248763.1 | 642  | 72  | 6.9  | 46.9 | 7p13       | TBRG4   | protein TBRG4 isoform 3 [Homo sapiens].                                      |
| 622 | NP_112162.1    | 521  | 58  | 6.6  | 41.8 | 7p13       | TBRG4   | protein TBRG4 isoform 2 [Homo sapiens].                                      |
| 623 | NP_954573.1    | 521  | 58  | 6.6  | 41.8 | 7p13       | TBRG4   | protein TBRG4 isoform 2 [Homo sapiens].                                      |
| 624 | NP_004740.2    | 631  | 71  | 7.0  | 46.1 | 7p13       | TBRG4   | protein TBRG4 isoform 1 [Homo sapiens].                                      |
| 625 | NP_005219.2    | 1210 | 132 | 6.1  | 31.2 | 7p12       | EGFR    | epidermal growth factor receptor isoform a precursor [Homo sapiens].         |
| 626 | NP_958441.1    | 705  | 75  | 6.4  | 33.3 | 7p12       | EGFR    | epidermal growth factor receptor isoform d precursor [Homo sapiens].         |
| 627 | NP_958439.1    | 628  | 67  | 6.5  | 31.6 | 7p12       | EGFR    | epidermal growth factor receptor isoform b precursor [Homo sapiens].         |
| 628 | NP_958440.1    | 405  | 42  | 6.2  | 30.7 | 7p12       | EGFR    | epidermal growth factor receptor isoform c precursor [Homo sapiens].         |
| 629 | NP_001245389.1 | 378  | 44  | 6.4  | 34.1 | 7p11.2     | PHKG1   | phosphorylase b kinase gamma catalytic chain, skeletal muscle                |
| 630 | NP_006204.1    | 387  | 45  | 6.4  | 34.1 | 7p11.2     | PHKG1   | phosphorylase b kinase gamma catalytic chain, skeletal muscle                |
| 631 | NP_001245388.1 | 419  | 49  | 6.3  | 31.5 | 7p11.2     | PHKG1   | phosphorylase b kinase gamma catalytic chain, skeletal muscle                |
| 632 | NP_115784.1    | 1483 | 171 | 8.5  | 21.5 | 7q11.23    | BAZ1B   | tyrosine-protein kinase BAZ1B [Homo sapiens].                                |
| 633 | NP_002305.1    | 647  | 73  | 6.5  | 32.0 | 7q11.23    | LIMK1   | LIM domain kinase 1 isoform 1 [Homo sapiens].                                |
| 634 | NP_001191355.1 | 613  | 69  | 7.6  | 31.3 | 7q11.23    | LIMK1   | LIM domain kinase 1 isoform 2 [Homo sapiens].                                |
| 635 | NP_057170.1    | 313  | 36  | 5.7  | 39.6 | 7q11.23    | STYXL1  | serine/threonine/tyrosine-interacting-like protein 1 [Homo sapiens].         |
| 636 | NP_036611.2    | 247  | 28  | 4.7  | 22.7 | 7q11.23    | YWHAG   | 14-3-3 protein gamma [Homo sapiens].                                         |
| 637 | NP_036433.2    | 1455 | 159 | 5.9  | 24.3 | 7q21       | MAGI2   | membrane-associated guanylate kinase, WW and PDZ domain-containing           |
| 638 | NP_036527.1    | 451  | 51  | 9.0  | 31.3 | 7q21-q22   | CDK14   | cyclin-dependent kinase 14 [Homo sapiens].                                   |
| 639 | NP_005742.4    | 3907 | 453 | 4.8  | 16.9 | 7q21-q22   | AKAP9   | A-kinase anchor protein 9 isoform 2 [Homo sapiens].                          |
| 640 | NP_671714.1    | 3899 | 452 | 4.8  | 16.8 | 7q21-q22   | AKAP9   | A-kinase anchor protein 9 isoform 3 [Homo sapiens].                          |
| 641 | NP_001250.1    | 326  | 37  | 6.0  | 39.6 | 7q21-q22   | CDK6    | cyclin-dependent kinase 6 [Homo sapiens].                                    |
| 642 | NP_001138778.1 | 326  | 37  | 6.0  | 39.6 | 7q21-q22   | CDK6    | cyclin-dependent kinase 6 [Homo sapiens].                                    |
| 643 | NP_002603.1    | 411  | 46  | 6.2  | 40.1 | 7q21.3     | PDK4    | pyruvate dehydrogenase kinase, isozyme 4 [Homo sapiens].                     |

|     |                |      |     |      |      |            |           |                                                                     |
|-----|----------------|------|-----|------|------|------------|-----------|---------------------------------------------------------------------|
| 644 | NP_055731.2    | 1503 | 162 | 4.2  | 26.6 | 7q21.3     | LMTK2     | serine/threonine-protein kinase LMTK2 precursor [Homo sapiens].     |
| 645 | NP_061330.2    | 511  | 57  | 8.9  | 22.9 | 7q22.1     | BAIAP2L1  | brain-specific angiogenesis inhibitor 1-associated protein 2-like   |
| 646 | NP_775835.2    | 841  | 88  | 10.0 | 25.6 | 7q22.1     | NYAP1     | neuronal tyrosine-phosphorylated phosphoinositide-3-kinase adapter  |
| 647 | NP_004435.3    | 987  | 107 | 6.5  | 36.4 | 7q22       | EPHB4     | ephrin type-B receptor 4 precursor [Homo sapiens].                  |
| 648 | NP_872634.1    | 699  | 79  | 5.0  | 26.3 | 7q22-q31.1 | SRPK2     | SRSF protein kinase 2 isoform a [Homo sapiens].                     |
| 649 | NP_872633.1    | 688  | 78  | 4.7  | 26.2 | 7q22-q31.1 | SRPK2     | SRSF protein kinase 2 isoform b [Homo sapiens].                     |
| 650 | NP_002640.2    | 1102 | 126 | 7.2  | 37.2 | 7q22.3     | PIK3CG    | phosphatidylinositol 4,5-bisphosphate 3-kinase catalytic subunit    |
| 651 | NP_002727.2    | 418  | 46  | 4.7  | 38.5 | 7q22       | PRKAR2B   | cAMP-dependent protein kinase type II-beta regulatory subunit [Homo |
| 652 | NP_001120972.1 | 1408 | 155 | 6.8  | 42.7 | 7q31       | MET       | hepatocyte growth factor receptor isoform a precursor [Homo         |
| 653 | NP_000236.2    | 1390 | 153 | 6.8  | 42.5 | 7q31       | MET       | hepatocyte growth factor receptor isoform b precursor [Homo         |
| 654 | NP_057562.3    | 502  | 55  | 5.3  | 29.9 | 7q32.2     | ZC3HC1    | nuclear-interacting partner of ALK [Homo sapiens].                  |
| 655 | NP_653249.1    | 825  | 94  | 6.0  | 31.0 | 7q33       | LRGUK     | leucine-rich repeat and guanylate kinase domain-containing protein  |
| 656 | NP_004708.1    | 1065 | 117 | 7.6  | 35.5 | 7q32.3-q33 | DGKI      | diacylglycerol kinase iota [Homo sapiens].                          |
| 657 | NP_001106710.1 | 1171 | 128 | 8.4  | 37.0 | 7q32-q34   | HIPK2     | homeodomain-interacting protein kinase 2 isoform 2 [Homo sapiens].  |
| 658 | NP_073577.3    | 1198 | 131 | 8.3  | 37.6 | 7q32-q34   | HIPK2     | homeodomain-interacting protein kinase 2 isoform 1 [Homo sapiens].  |
| 659 | NP_443085.2    | 626  | 69  | 8.8  | 55.1 | 7q34       | ADCK2     | uncharacterized aarF domain-containing protein kinase 2 [Homo       |
| 660 | NP_004324.2    | 766  | 84  | 7.3  | 34.2 | 7q34       | BRAF      | serine/threonine-protein kinase B-raf [Homo sapiens].               |
| 661 | NP_001099028.1 | 567  | 63  | 6.1  | 21.5 | 7q32       | WEK2      | weel-like protein kinase 2 [Homo sapiens].                          |
| 662 | NP_005223.4    | 976  | 108 | 6.2  | 33.7 | 7q34       | EPHA1     | ephrin type-A receptor 1 precursor [Homo sapiens].                  |
| 663 | NP_001035947.1 | 194  | 22  | 5.1  | 37.1 | 7q34-q35   | TPK1      | thiamin pyrophosphokinase 1 isoform b [Homo sapiens].               |
| 664 | NP_071890.2    | 243  | 27  | 4.9  | 47.7 | 7q34-q35   | TPK1      | thiamin pyrophosphokinase 1 isoform a [Homo sapiens].               |
| 665 | NP_001157882.1 | 260  | 30  | 6.0  | 35.8 | 7q36       | CDK5      | cyclin-dependent kinase 5 isoform 2 [Homo sapiens].                 |
| 666 | NP_004926.1    | 292  | 33  | 7.5  | 37.3 | 7q36       | CDK5      | cyclin-dependent kinase 5 isoform 1 [Homo sapiens].                 |
| 667 | NP_148936.2    | 408  | 46  | 9.9  | 41.9 | 7q35       | FASTK     | fas-activated serine/threonine kinase isoform 4 [Homo sapiens].     |
| 668 | NP_001245390.1 | 522  | 58  | 10.1 | 42.3 | 7q35       | FASTK     | fas-activated serine/threonine kinase isoform 5 [Homo sapiens].     |
| 669 | NP_006703.1    | 549  | 61  | 10.2 | 43.0 | 7q35       | FASTK     | fas-activated serine/threonine kinase isoform 1 [Homo sapiens].     |
| 670 | NP_057287.2    | 569  | 63  | 9.7  | 38.3 | 7q36.1     | PRKAG2    | 5'-AMP-activated protein kinase subunit gamma-2 isoform a [Homo     |
| 671 | NP_001035723.1 | 525  | 58  | 9.3  | 39.0 | 7q36.1     | PRKAG2    | 5'-AMP-activated protein kinase subunit gamma-2 isoform c [Homo     |
| 672 | NP_077747.1    | 328  | 38  | 5.9  | 54.3 | 7q36.1     | PRKAG2    | 5'-AMP-activated protein kinase subunit gamma-2 isoform b [Homo     |
| 673 | NP_001074295.1 | 1402 | 149 | 6.8  | 24.5 | 8p23.1     | SGK223    | tyrosine-protein kinase Sgk223 [Homo sapiens].                      |
| 674 | NP_001706.2    | 505  | 58  | 7.8  | 35.4 | 8p23-p22   | BLK       | tyrosine-protein kinase Blk [Homo sapiens].                         |
| 675 | NP_003965.2    | 412  | 45  | 5.7  | 23.1 | 8p21.3     | DOK2      | docking protein 2 [Homo sapiens].                                   |
| 676 | NP_775266.1    | 1009 | 116 | 5.9  | 33.7 | 8p21.1     | PTK2B     | protein-tyrosine kinase 2-beta isoform a [Homo sapiens].            |
| 677 | NP_004094.3    | 1009 | 116 | 5.9  | 33.7 | 8p21.1     | PTK2B     | protein-tyrosine kinase 2-beta isoform a [Homo sapiens].            |
| 678 | NP_775268.1    | 1009 | 116 | 5.9  | 33.7 | 8p21.1     | PTK2B     | protein-tyrosine kinase 2-beta isoform a [Homo sapiens].            |
| 679 | NP_775267.1    | 967  | 111 | 5.6  | 34.0 | 8p21.1     | PTK2B     | protein-tyrosine kinase 2-beta isoform b [Homo sapiens].            |
| 680 | NP_056069.2    | 1826 | 203 | 5.6  | 30.1 | 8p12       | KIF13B    | kinesin-like protein KIF13B [Homo sapiens].                         |
| 681 | NP_001385.1    | 394  | 43  | 7.1  | 44.7 | 8p12-p11   | DUSP4     | dual specificity protein phosphatase 4 isoform 1 [Homo sapiens].    |
| 682 | NP_476499.1    | 303  | 33  | 7.9  | 42.2 | 8p12-p11   | DUSP4     | dual specificity protein phosphatase 4 isoform 2 [Homo sapiens].    |
| 683 | NP_076930.1    | 211  | 24  | 9.9  | 42.2 | 8p12       | DUSP26    | dual specificity protein phosphatase 26 [Homo sapiens].             |
| 684 | NP_001167538.1 | 853  | 93  | 5.8  | 34.7 | 8p12       | FGFR1     | fibroblast growth factor receptor 1 isoform 14 precursor [Homo      |
| 685 | NP_075594.1    | 731  | 79  | 6.0  | 33.4 | 8p12       | FGFR1     | fibroblast growth factor receptor 1 isoform 4 precursor [Homo       |
| 686 | NP_075593.1    | 733  | 80  | 6.1  | 33.4 | 8p12       | FGFR1     | fibroblast growth factor receptor 1 isoform 3 precursor [Homo       |
| 687 | NP_001167537.1 | 733  | 80  | 6.1  | 33.4 | 8p12       | FGFR1     | fibroblast growth factor receptor 1 isoform 3 precursor [Homo       |
| 688 | NP_056934.2    | 820  | 89  | 5.7  | 33.8 | 8p12       | FGFR1     | fibroblast growth factor receptor 1 isoform 2 precursor [Homo       |
| 689 | NP_001167536.1 | 820  | 89  | 5.7  | 33.8 | 8p12       | FGFR1     | fibroblast growth factor receptor 1 isoform 2 precursor [Homo       |
| 690 | NP_001167534.1 | 820  | 89  | 5.7  | 33.3 | 8p12       | FGFR1     | fibroblast growth factor receptor 1 isoform 10 precursor [Homo      |
| 691 | NP_075598.2    | 822  | 89  | 5.7  | 33.8 | 8p12       | FGFR1     | fibroblast growth factor receptor 1 isoform 1 precursor [Homo       |
| 692 | NP_001167535.1 | 812  | 88  | 5.7  | 33.6 | 8p12       | FGFR1     | fibroblast growth factor receptor 1 isoform 11 precursor [Homo      |
| 693 | NP_001177649.1 | 754  | 86  | 5.6  | 29.2 | 8p11.2     | IKBKB     | inhibitor of nuclear factor kappa-B kinase subunit beta isoform 2   |
| 694 | NP_001547.1    | 756  | 87  | 5.5  | 29.9 | 8p11.2     | IKBKB     | inhibitor of nuclear factor kappa-B kinase subunit beta isoform 1   |
| 695 | NP_001229707.1 | 697  | 80  | 5.2  | 31.1 | 8p11.2     | IKBKB     | inhibitor of nuclear factor kappa-B kinase subunit beta isoform 5   |
| 696 | NP_115613.1    | 350  | 40  | 5.7  | 34.3 | 8p11.21    | SGK196    | protein kinase-like protein Sgk196 [Homo sapiens].                  |
| 697 | NP_001075109.1 | 4097 | 466 | 6.8  | 43.0 | 8q11       | PRKDC     | DNA-dependent protein kinase catalytic subunit isoform 2 [Homo      |
| 698 | NP_008835.5    | 4128 | 469 | 6.7  | 43.0 | 8q11       | PRKDC     | DNA-dependent protein kinase catalytic subunit isoform 1 [Homo      |
| 699 | NP_002341.1    | 512  | 59  | 6.8  | 31.3 | 8q13       | LYN       | tyrosine-protein kinase Lyn isoform A [Homo sapiens].               |
| 700 | NP_001104567.1 | 491  | 56  | 6.1  | 32.6 | 8q13       | LYN       | tyrosine-protein kinase Lyn isoform B [Homo sapiens].               |
| 701 | NP_005363.1    | 346  | 38  | 9.0  | 43.4 | 8q11       | MOS       | proto-oncogene serine/threonine-protein kinase mos [Homo sapiens].  |
| 702 | NP_001191102.1 | 496  | 57  | 6.5  | 37.3 | 8          | C8orf44-S | serine/threonine-protein kinase Sgk3 [Homo sapiens].                |

|     |                |      |     |      |      |         |         |                                                                         |
|-----|----------------|------|-----|------|------|---------|---------|-------------------------------------------------------------------------|
| 703 | NP_037389.4    | 496  | 57  | 6.5  | 37.3 | 8q12    | SGK3    | serine/threonine-protein kinase Sgk3 isoform 1 [Homo sapiens].          |
| 704 | NP_001028750.1 | 496  | 57  | 6.5  | 37.3 | 8q12    | SGK3    | serine/threonine-protein kinase Sgk3 isoform 1 [Homo sapiens].          |
| 705 | NP_733827.2    | 464  | 53  | 6.8  | 35.8 | 8q12    | SGK3    | serine/threonine-protein kinase Sgk3 isoform 2 [Homo sapiens].          |
| 706 | NP_006814.1    | 76   | 8   | 4.3  | 27.6 | 8q21.12 | PKIA    | cAMP-dependent protein kinase inhibitor alpha [Homo sapiens].           |
| 707 | NP_862822.1    | 76   | 8   | 4.3  | 27.6 | 8q21.12 | PKIA    | cAMP-dependent protein kinase inhibitor alpha [Homo sapiens].           |
| 708 | NP_149117.1    | 385  | 43  | 10.0 | 35.3 | 8q21.3  | PSKH2   | serine/threonine-protein kinase H2 [Homo sapiens].                      |
| 709 | NP_003812.1    | 540  | 61  | 6.7  | 31.1 | 8q21    | RIPK2   | receptor-interacting serine/threonine-protein kinase 2 [Homo sapiens].  |
| 710 | NP_001243241.1 | 519  | 59  | 5.0  | 29.7 | 8q22.2  | STK3    | serine/threonine-protein kinase 3 isoform 2 [Homo sapiens].             |
| 711 | NP_001243242.1 | 380  | 44  | 4.9  | 22.1 | 8q22.2  | STK3    | serine/threonine-protein kinase 3 isoform 3 [Homo sapiens].             |
| 712 | NP_006272.2    | 491  | 37  | 5.0  | 37.6 | 8q22.2  | STK3    | serine/threonine-protein kinase 3 isoform 1 [Homo sapiens].             |
| 712 | NP_006272.2    | 491  | 20  | 4.9  | 11.8 | 8q22.2  | STK3    | serine/threonine-protein kinase 3 isoform 1 [Homo sapiens].             |
| 713 | NP_003397.1    | 245  | 28  | 4.6  | 25.7 | 8q23.1  | YWHAZ   | 14-3-3 protein zeta/delta [Homo sapiens].                               |
| 714 | NP_663723.1    | 245  | 28  | 4.6  | 25.7 | 8q23.1  | YWHAZ   | 14-3-3 protein zeta/delta [Homo sapiens].                               |
| 715 | NP_001129171.1 | 245  | 28  | 4.6  | 25.7 | 8q23.1  | YWHAZ   | 14-3-3 protein zeta/delta [Homo sapiens].                               |
| 716 | NP_001129172.1 | 245  | 28  | 4.6  | 25.7 | 8q23.1  | YWHAZ   | 14-3-3 protein zeta/delta [Homo sapiens].                               |
| 717 | NP_001129173.1 | 245  | 28  | 4.6  | 25.7 | 8q23.1  | YWHAZ   | 14-3-3 protein zeta/delta [Homo sapiens].                               |
| 718 | NP_001129174.1 | 245  | 28  | 4.6  | 25.7 | 8q23.1  | YWHAZ   | 14-3-3 protein zeta/delta [Homo sapiens].                               |
| 719 | NP_005598.3    | 1074 | 122 | 6.1  | 31.1 | 8q24.3  | PTK2    | focal adhesion kinase 1 isoform b [Homo sapiens].                       |
| 720 | NP_722560.1    | 1052 | 119 | 6.2  | 30.6 | 8q24.3  | PTK2    | focal adhesion kinase 1 isoform a [Homo sapiens].                       |
| 721 | NP_001186578.1 | 1065 | 121 | 6.3  | 30.2 | 8q24.3  | PTK2    | focal adhesion kinase 1 isoform c [Homo sapiens].                       |
| 722 | NP_620590.2    | 544  | 60  | 9.1  | 36.9 | 8q24.3  | MAPK15  | mitogen-activated protein kinase 15 [Homo sapiens].                     |
| 723 | NP_777582.3    | 580  | 66  | 9.1  | 50.9 | 8q24.3  | ADCK5   | uncharacterized aarF domain-containing protein kinase 5 [Homo sapiens]. |
| 724 | NP_001186781.1 | 187  | 21  | 9.9  | 20.3 | 9p24.1  | AK3     | GTP:AMP phosphotransferase, mitochondrial isoform b [Homo sapiens].     |
| 725 | NP_057366.2    | 227  | 26  | 9.5  | 27.8 | 9p24.1  | AK3     | GTP:AMP phosphotransferase, mitochondrial isoform a [Homo sapiens].     |
| 726 | NP_001186782.1 | 157  | 18  | 9.2  | 19.1 | 9p24.1  | AK3     | GTP:AMP phosphotransferase, mitochondrial isoform c [Homo sapiens].     |
| 727 | NP_001186784.1 | 157  | 18  | 9.2  | 19.1 | 9p24.1  | AK3     | GTP:AMP phosphotransferase, mitochondrial isoform c [Homo sapiens].     |
| 728 | NP_001186785.1 | 157  | 18  | 9.2  | 19.1 | 9p24.1  | AK3     | GTP:AMP phosphotransferase, mitochondrial isoform c [Homo sapiens].     |
| 729 | NP_004963.1    | 1132 | 131 | 6.8  | 32.0 | 9p24    | JAK2    | tyrosine-protein kinase JAK2 [Homo sapiens].                            |
| 730 | NP_001001874.1 | 136  | 15  | 10.2 | 28.7 | 9p24.1  | TPD52L3 | tumor protein D55 isoform 2 [Homo sapiens].                             |
| 731 | NP_001001875.1 | 132  | 15  | 10.2 | 23.5 | 9p24.1  | TPD52L3 | tumor protein D55 isoform 3 [Homo sapiens].                             |
| 732 | NP_277051.3    | 140  | 15  | 10.4 | 28.6 | 9p24.1  | TPD52L3 | tumor protein D55 isoform 1 [Homo sapiens].                             |
| 733 | NP_000068.1    | 156  | 17  | 5.4  | 34.0 | 9p21    | CDKN2A  | cyclin-dependent kinase inhibitor 2A isoform p16INK4a [Homo sapiens].   |
| 734 | NP_001182061.1 | 167  | 18  | 6.4  | 34.1 | 9p21    | CDKN2A  | cyclin-dependent kinase inhibitor 2A isoform p16gamma [Homo sapiens].   |
| 735 | NP_478102.2    | 132  | 14  | 12.9 | 28.8 | 9p21    | CDKN2A  | cyclin-dependent kinase inhibitor 2A isoform p14ARF [Homo sapiens].     |
| 736 | NP_478104.2    | 116  | 12  | 5.8  | 19.8 | 9p21    | CDKN2A  | cyclin-dependent kinase inhibitor 2A isoform p12 [Homo sapiens].        |
| 737 | NP_004927.2    | 138  | 15  | 6.1  | 34.1 | 9p21    | CDKN2B  | cyclin-dependent kinase 4 inhibitor B isoform 1 [Homo sapiens].         |
| 738 | NP_511042.1    | 78   | 8   | 12.2 | 21.8 | 9p21    | CDKN2B  | cyclin-dependent kinase 4 inhibitor B isoform 2 [Homo sapiens].         |
| 739 | NP_000450.2    | 1124 | 124 | 6.5  | 34.3 | 9p21    | TEK     | angiopoietin-1 receptor precursor [Homo sapiens].                       |
| 740 | NP_079037.3    | 216  | 25  | 8.4  | 41.2 | 9p21.2  | MOB3B   | MOB kinase activator 3B [Homo sapiens].                                 |
| 741 | NP_006276.2    | 626  | 68  | 8.0  | 31.5 | 9p13    | TESK1   | dual specificity testis-specific protein kinase 1 [Homo sapiens].       |
| 742 | NP_115982.1    | 163  | 16  | 7.5  | 40.4 | 9p13.3  | HINT2   | histidine triad nucleotide-binding protein 2, mitochondrial             |
| 743 | NP_001177317.1 | 717  | 79  | 6.9  | 48.4 | 9p13.3  | GNE     | bifunctional UDP-N-acetylglucosamine                                    |
| 744 | NP_001121699.1 | 753  | 83  | 6.5  | 46.5 | 9p13.3  | GNE     | bifunctional UDP-N-acetylglucosamine                                    |
| 745 | NP_001177312.1 | 648  | 71  | 6.3  | 50.0 | 9p13.3  | GNE     | bifunctional UDP-N-acetylglucosamine                                    |
| 746 | NP_005467.1    | 722  | 79  | 6.3  | 48.5 | 9p13.3  | GNE     | bifunctional UDP-N-acetylglucosamine                                    |
| 747 | NP_001177313.1 | 612  | 67  | 6.3  | 48.2 | 9p13.3  | GNE     | bifunctional UDP-N-acetylglucosamine                                    |
| 748 | NP_055606.1    | 651  | 75  | 8.8  | 28.1 | 9p13.2  | MELK    | maternal embryonic leucine zipper kinase isoform 1 [Homo sapiens].      |
| 749 | NP_001243614.1 | 610  | 70  | 9.3  | 29.2 | 9p13.2  | MELK    | maternal embryonic leucine zipper kinase isoform 2 [Homo sapiens].      |
| 750 | NP_001243616.1 | 603  | 69  | 9.0  | 27.9 | 9p13.2  | MELK    | maternal embryonic leucine zipper kinase isoform 3 [Homo sapiens].      |
| 751 | NP_001243617.1 | 580  | 66  | 9.1  | 27.4 | 9p13.2  | MELK    | maternal embryonic leucine zipper kinase isoform 4 [Homo sapiens].      |
| 752 | NP_001243618.1 | 619  | 71  | 9.0  | 26.5 | 9p13.2  | MELK    | maternal embryonic leucine zipper kinase isoform 5 [Homo sapiens].      |
| 753 | NP_001243620.1 | 571  | 66  | 9.3  | 26.1 | 9p13.2  | MELK    | maternal embryonic leucine zipper kinase isoform 7 [Homo sapiens].      |
| 754 | NP_001243619.1 | 580  | 67  | 9.1  | 25.9 | 9p13.2  | MELK    | maternal embryonic leucine zipper kinase isoform 6 [Homo sapiens].      |
| 755 | NP_001243621.1 | 520  | 60  | 9.2  | 25.0 | 9p13.2  | MELK    | maternal embryonic leucine zipper kinase isoform 8 [Homo sapiens].      |
| 756 | NP_001243622.1 | 457  | 53  | 9.7  | 22.8 | 9p13.2  | MELK    | maternal embryonic leucine zipper kinase isoform 9 [Homo sapiens].      |
| 757 | NP_003549.1    | 540  | 61  | 6.4  | 32.4 | 9q13    | PIP5K1B | phosphatidylinositol 4-phosphate 5-kinase type-1 beta isoform 2         |
| 758 | NP_002723.2    | 351  | 40  | 8.8  | 28.5 | 9q13    | PRKACG  | cAMP-dependent protein kinase catalytic subunit gamma [Homo sapiens].   |
| 759 | NP_060132.3    | 2022 | 232 | 7.5  | 36.4 | 9q21.13 | TRPM6   | transient receptor potential cation channel subfamily M member 6        |
| 760 | NP_001170781.1 | 2017 | 231 | 7.6  | 36.5 | 9q21.13 | TRPM6   | transient receptor potential cation channel subfamily M member 6        |

|     |                |      |     |     |      |            |         |                                                                     |
|-----|----------------|------|-----|-----|------|------------|---------|---------------------------------------------------------------------|
| 761 | NP_001170782.1 | 2017 | 231 | 7.5 | 36.4 | 9q21.13    | TRPM6   | transient receptor potential cation channel subfamily M member 6    |
| 762 | NP_001121075.1 | 175  | 20  | 4.4 | 30.3 | 9q21.13    | NMRK1   | nicotinamide riboside kinase 1 isoform 2 [Homo sapiens].            |
| 763 | NP_060351.1    | 199  | 23  | 4.7 | 28.6 | 9q21.13    | NMRK1   | nicotinamide riboside kinase 1 isoform 1 [Homo sapiens].            |
| 764 | NP_001001551.2 | 187  | 21  | 5.8 | 44.4 | 9q21.32    | IDNK    | probable gluconokinase isoform 1 [Homo sapiens].                    |
| 765 | NP_001243844.1 | 141  | 16  | 5.9 | 44.7 | 9q21.32    | IDNK    | probable gluconokinase isoform 3 [Homo sapiens].                    |
| 766 | NP_001129425.1 | 315  | 36  | 9.7 | 15.9 | 9q21.32    | GKAP1   | G kinase-anchoring protein 1 isoform b [Homo sapiens].              |
| 767 | NP_079487.2    | 366  | 42  | 9.2 | 13.9 | 9q21.32    | GKAP1   | G kinase-anchoring protein 1 isoform a [Homo sapiens].              |
| 768 | NP_006171.2    | 838  | 90  | 5.9 | 35.2 | 9q22.1     | NTRK2   | BDNF/NT-3 growth factors receptor isoform a precursor [Homo         |
| 769 | NP_001018074.1 | 822  | 88  | 5.8 | 35.5 | 9q22.1     | NTRK2   | BDNF/NT-3 growth factors receptor isoform c precursor [Homo         |
| 770 | NP_001018075.1 | 553  | 57  | 5.6 | 32.6 | 9q22.1     | NTRK2   | BDNF/NT-3 growth factors receptor isoform d precursor [Homo         |
| 771 | NP_001018076.1 | 537  | 55  | 5.4 | 33.0 | 9q22.1     | NTRK2   | BDNF/NT-3 growth factors receptor isoform e precursor [Homo         |
| 772 | NP_001007098.1 | 477  | 49  | 5.6 | 36.1 | 9q22.1     | NTRK2   | BDNF/NT-3 growth factors receptor isoform b precursor [Homo         |
| 773 | NP_004929.2    | 1430 | 160 | 6.4 | 39.7 | 9q21.33    | DAPK1   | death-associated protein kinase 1 [Homo sapiens].                   |
| 774 | NP_036251.2    | 325  | 36  | 6.4 | 44.6 | 9q22.1     | CDK20   | cyclin-dependent kinase 20 isoform 2 [Homo sapiens].                |
| 775 | NP_001034892.1 | 346  | 39  | 6.3 | 42.2 | 9q22.1     | CDK20   | cyclin-dependent kinase 20 isoform 3 [Homo sapiens].                |
| 776 | NP_848519.1    | 338  | 38  | 6.6 | 45.3 | 9q22.1     | CDK20   | cyclin-dependent kinase 20 isoform 1 [Homo sapiens].                |
| 777 | NP_001164111.1 | 243  | 27  | 9.7 | 49.0 | 9q22.1     | CDK20   | cyclin-dependent kinase 20 isoform 5 [Homo sapiens].                |
| 778 | NP_001164110.1 | 275  | 31  | 7.2 | 49.5 | 9q22.1     | CDK20   | cyclin-dependent kinase 20 isoform 4 [Homo sapiens].                |
| 779 | NP_001818.1    | 79   | 10  | 9.0 | 11.4 | 9q22       | CKS2    | cyclin-dependent kinases regulatory subunit 2 [Homo sapiens].       |
| 780 | NP_003168.2    | 635  | 72  | 8.3 | 26.5 | 9q22       | SYK     | tyrosine-protein kinase SYK isoform 1 [Homo sapiens].               |
| 781 | NP_001167638.1 | 635  | 72  | 8.3 | 26.5 | 9q22       | SYK     | tyrosine-protein kinase SYK isoform 1 [Homo sapiens].               |
| 782 | NP_001128524.1 | 612  | 70  | 7.3 | 26.0 | 9q22       | SYK     | tyrosine-protein kinase SYK isoform 2 [Homo sapiens].               |
| 783 | NP_001167639.1 | 612  | 70  | 7.3 | 26.0 | 9q22       | SYK     | tyrosine-protein kinase SYK isoform 2 [Homo sapiens].               |
| 784 | NP_004551.2    | 943  | 101 | 5.9 | 29.8 | 9q22       | ROR2    | tyrosine-protein kinase transmembrane receptor ROR2 precursor [Homo |
| 785 | NP_006639.3    | 2217 | 234 | 5.4 | 31.9 | 9q22.3     | WNK2    | serine/threonine-protein kinase WNK2 [Homo sapiens].                |
| 786 | NP_004603.1    | 503  | 54  | 7.1 | 38.4 | 9q22       | TGFBFR1 | TGF-beta receptor type-1 isoform 1 precursor [Homo sapiens].        |
| 787 | NP_001124388.1 | 426  | 45  | 7.7 | 37.3 | 9q22       | TGFBFR1 | TGF-beta receptor type-1 isoform 2 precursor [Homo sapiens].        |
| 788 | NP_003631.2    | 1332 | 150 | 5.6 | 40.5 | 9q31       | IKBKAP  | elongator complex protein 1 [Homo sapiens].                         |
| 789 | NP_001032370.1 | 379  | 42  | 4.9 | 16.5 | 9q31.3     | PALM2   | paralemmmin-2 isoform b [Homo sapiens].                             |
| 790 | NP_443749.5    | 411  | 45  | 4.9 | 18.7 | 9q31.3     | PALM2   | paralemmmin-2 isoform a [Homo sapiens].                             |
| 791 | NP_001185585.1 | 961  | 106 | 4.9 | 14.7 | 9q31.3     | AKAP2   | A-kinase anchor protein 2 isoform 3 [Homo sapiens].                 |
| 792 | NP_001004065.2 | 948  | 104 | 4.9 | 13.9 | 9q31.3     | AKAP2   | A-kinase anchor protein 2 isoform 1 [Homo sapiens].                 |
| 793 | NP_001130034.1 | 859  | 95  | 4.9 | 14.6 | 9q31.3     | AKAP2   | A-kinase anchor protein 2 isoform 2 [Homo sapiens].                 |
| 794 | NP_001159752.1 | 783  | 88  | 6.7 | 44.7 | 9q31.3-q32 | MUSK    | muscle, skeletal receptor tyrosine-protein kinase isoform 2 [Homo   |
| 795 | NP_005583.1    | 869  | 97  | 6.9 | 46.4 | 9q31.3-q32 | MUSK    | muscle, skeletal receptor tyrosine-protein kinase isoform 1 [Homo   |
| 796 | NP_001159753.1 | 773  | 86  | 7.4 | 45.9 | 9q31.3-q32 | MUSK    | muscle, skeletal receptor tyrosine-protein kinase isoform 3 [Homo   |
| 797 | NP_001159639.1 | 331  | 38  | 8.7 | 36.3 | 9q33.3-q34 | NEK6    | serine/threonine-protein kinase Nek6 isoform 3 [Homo sapiens].      |
| 798 | NP_001159641.1 | 338  | 38  | 8.1 | 35.5 | 9q33.3-q34 | NEK6    | serine/threonine-protein kinase Nek6 isoform 4 [Homo sapiens].      |
| 799 | NP_001138473.1 | 347  | 40  | 8.4 | 34.6 | 9q33.3-q34 | NEK6    | serine/threonine-protein kinase Nek6 isoform 1 [Homo sapiens].      |
| 800 | NP_001159643.1 | 347  | 40  | 8.4 | 34.6 | 9q33.3-q34 | NEK6    | serine/threonine-protein kinase Nek6 isoform 1 [Homo sapiens].      |
| 801 | NP_055212.2    | 313  | 36  | 7.9 | 35.1 | 9q33.3-q34 | NEK6    | serine/threonine-protein kinase Nek6 isoform 2 [Homo sapiens].      |
| 802 | NP_001159640.1 | 313  | 36  | 7.9 | 35.1 | 9q33.3-q34 | NEK6    | serine/threonine-protein kinase Nek6 isoform 2 [Homo sapiens].      |
| 803 | NP_001159642.1 | 313  | 36  | 7.9 | 35.1 | 9q33.3-q34 | NEK6    | serine/threonine-protein kinase Nek6 isoform 2 [Homo sapiens].      |
| 804 | NP_077022.1    | 486  | 55  | 8.3 | 30.0 | 9q33.3     | MAPKAP1 | target of rapamycin complex 2 subunit MAPKAP1 isoform 2 [Homo       |
| 805 | NP_001006620.1 | 475  | 54  | 7.8 | 29.1 | 9q33.3     | MAPKAP1 | target of rapamycin complex 2 subunit MAPKAP1 isoform 3 [Homo       |
| 806 | NP_001006618.1 | 522  | 59  | 7.3 | 29.9 | 9q33.3     | MAPKAP1 | target of rapamycin complex 2 subunit MAPKAP1 isoform 1 [Homo       |
| 807 | NP_001006621.1 | 330  | 37  | 6.3 | 34.2 | 9q33.3     | MAPKAP1 | target of rapamycin complex 2 subunit MAPKAP1 isoform 4 [Homo       |
| 808 | NP_001006622.1 | 330  | 37  | 6.3 | 34.2 | 9q33.3     | MAPKAP1 | target of rapamycin complex 2 subunit MAPKAP1 isoform 4 [Homo       |
| 809 | NP_001006619.1 | 323  | 36  | 7.7 | 29.7 | 9q33.3     | MAPKAP1 | target of rapamycin complex 2 subunit MAPKAP1 isoform 5 [Homo       |
| 810 | NP_001252.1    | 372  | 43  | 9.0 | 34.7 | 9q34.1     | CDK9    | cyclin-dependent kinase 9 [Homo sapiens].                           |
| 811 | NP_000467.1    | 194  | 22  | 9.0 | 28.9 | 9q34.1     | AK1     | adenylate kinase isoenzyme 1 [Homo sapiens].                        |
| 812 | NP_001128691.1 | 394  | 45  | 9.9 | 32.0 | 9q34.11    | PIP5KL1 | phosphatidylinositol 4-phosphate 5-kinase-like protein 1 isoform 1  |
| 813 | NP_775763.1    | 191  | 22  | 9.4 | 27.7 | 9q34.11    | PIP5KL1 | phosphatidylinositol 4-phosphate 5-kinase-like protein 1 isoform 2  |
| 814 | NP_037487.2    | 889  | 99  | 8.4 | 35.4 | 9q34.11    | PKN3    | serine/threonine-protein kinase N3 [Homo sapiens].                  |
| 815 | NP_055723.1    | 538  | 59  | 8.6 | 70.6 | 9q34.11    | DOLK    | dolichol kinase [Homo sapiens].                                     |
| 816 | NP_009297.2    | 1149 | 125 | 9.1 | 24.7 | 9q34.1     | ABL1    | tyrosine-protein kinase ABL1 isoform b [Homo sapiens].              |
| 817 | NP_005148.2    | 1130 | 123 | 8.8 | 24.9 | 9q34.1     | ABL1    | tyrosine-protein kinase ABL1 isoform a [Homo sapiens].              |
| 818 | NP_001248379.1 | 268  | 31  | 6.6 | 28.4 | 9q34.13    | UCK1    | uridine-cytidine kinase 1 isoform c [Homo sapiens].                 |
| 819 | NP_001248380.1 | 282  | 32  | 6.4 | 29.4 | 9q34.13    | UCK1    | uridine-cytidine kinase 1 isoform d [Homo sapiens].                 |

|     |                |      |     |     |      |            |          |                                                                                   |
|-----|----------------|------|-----|-----|------|------------|----------|-----------------------------------------------------------------------------------|
| 820 | NP_113620.1    | 277  | 31  | 6.9 | 28.9 | 9q34.13    | UCK1     | uridine-cytidine kinase 1 isoform a [Homo sapiens].                               |
| 821 | NP_001129426.1 | 201  | 23  | 5.8 | 23.4 | 9q34.13    | UCK1     | uridine-cytidine kinase 1 isoform b [Homo sapiens].                               |
| 822 | NP_689785.1    | 479  | 55  | 5.7 | 40.9 | 9q34.13    | AK8      | adenylate kinase 8 [Homo sapiens].                                                |
| 823 | NP_714921.3    | 680  | 76  | 5.1 | 47.6 | 9q34.2     | C9orf96  | protein kinase-like protein SgK071 [Homo sapiens].                                |
| 824 | NP_002618.1    | 784  | 86  | 7.3 | 44.1 | 10p15.3-p1 | PFKP     | 6-phosphofructokinase type C isoform 1 [Homo sapiens].                            |
| 825 | NP_001229268.1 | 776  | 85  | 8.5 | 40.1 | 10p15.3-p1 | PFKP     | 6-phosphofructokinase type C isoform 2 [Homo sapiens].                            |
| 826 | NP_001229342.1 | 643  | 74  | 7.8 | 29.9 | 10p15      | PRKCQ    | protein kinase C theta type isoform 2 [Homo sapiens].                             |
| 827 | NP_006248.1    | 706  | 82  | 7.4 | 30.2 | 10p15      | PRKCQ    | protein kinase C theta type isoform 1 [Homo sapiens].                             |
| 828 | NP_705718.1    | 385  | 43  | 6.8 | 34.5 | 10p13      | CAMK1D   | calcium/calmodulin-dependent protein kinase type 1D isoform 2 [Homo sapiens].     |
| 829 | NP_065130.1    | 357  | 40  | 6.1 | 30.8 | 10p13      | CAMK1D   | calcium/calmodulin-dependent protein kinase type 1D isoform 1 [Homo sapiens].     |
| 830 | NP_001182533.1 | 321  | 35  | 5.0 | 47.7 | 10p14      | SEPHS1   | selenide, water dikinase 1 isoform 3 [Homo sapiens].                              |
| 831 | NP_036379.2    | 392  | 43  | 5.6 | 50.8 | 10p14      | SEPHS1   | selenide, water dikinase 1 isoform 1 [Homo sapiens].                              |
| 832 | NP_001182531.1 | 325  | 35  | 5.9 | 56.0 | 10p14      | SEPHS1   | selenide, water dikinase 1 isoform 2 [Homo sapiens].                              |
| 833 | NP_005019.2    | 406  | 46  | 6.5 | 26.6 | 10p12.2    | PIP4K2A  | phosphatidylinositol 5-phosphate 4-kinase type-2 alpha [Homo sapiens].            |
| 834 | NP_001165774.1 | 879  | 97  | 5.6 | 30.4 | 10p12.1    | MASTL    | serine/threonine-protein kinase greatwall isoform 1 [Homo sapiens].               |
| 835 | NP_116233.2    | 878  | 97  | 5.6 | 30.4 | 10p12.1    | MASTL    | serine/threonine-protein kinase greatwall isoform 2 [Homo sapiens].               |
| 836 | NP_001165775.1 | 840  | 93  | 5.7 | 29.6 | 10p12.1    | MASTL    | serine/threonine-protein kinase greatwall isoform 3 [Homo sapiens].               |
| 837 | NP_005195.2    | 467  | 53  | 5.5 | 37.5 | 10p11.23   | MAP3K8   | mitogen-activated protein kinase kinase kinase 8 [Homo sapiens].                  |
| 838 | NP_001231063.1 | 467  | 53  | 5.5 | 37.5 | 10p11.23   | MAP3K8   | mitogen-activated protein kinase kinase kinase 8 [Homo sapiens].                  |
| 839 | NP_066124.1    | 1114 | 124 | 6.2 | 35.9 | 10q11.2    | RET      | proto-oncogene tyrosine-protein kinase receptor Ret isoform a [Homo sapiens].     |
| 840 | NP_065681.1    | 1072 | 120 | 6.5 | 36.5 | 10q11.2    | RET      | proto-oncogene tyrosine-protein kinase receptor Ret isoform c [Homo sapiens].     |
| 841 | NP_620637.1    | 427  | 48  | 6.5 | 38.6 | 10q11.22   | MAPK8    | mitogen-activated protein kinase 8 isoform JNK1 alpha2 [Homo sapiens].            |
| 842 | NP_620635.1    | 427  | 48  | 6.3 | 39.6 | 10q11.22   | MAPK8    | mitogen-activated protein kinase 8 isoform JNK1 beta2 [Homo sapiens].             |
| 843 | NP_002741.1    | 384  | 44  | 7.5 | 38.5 | 10q11.22   | MAPK8    | mitogen-activated protein kinase 8 isoform JNK1 alpha1 [Homo sapiens].            |
| 844 | NP_620634.1    | 384  | 44  | 7.2 | 39.6 | 10q11.22   | MAPK8    | mitogen-activated protein kinase 8 isoform JNK1 beta1 [Homo sapiens].             |
| 845 | NP_001091982.1 | 671  | 76  | 5.7 | 36.1 | 10q11.2    | PRKG1    | cGMP-dependent protein kinase 1 isoform 1 [Homo sapiens].                         |
| 846 | NP_006249.1    | 686  | 78  | 5.2 | 35.1 | 10q11.2    | PRKG1    | cGMP-dependent protein kinase 1 isoform 2 [Homo sapiens].                         |
| 847 | NP_001777.1    | 297  | 34  | 8.8 | 35.0 | 10q21.1    | CDK1     | cyclin-dependent kinase 1 isoform 1 [Homo sapiens].                               |
| 848 | NP_203698.1    | 240  | 28  | 6.7 | 30.8 | 10q21.1    | CDK1     | cyclin-dependent kinase 1 isoform 2 [Homo sapiens].                               |
| 849 | NP_001163877.1 | 109  | 12  | 7.6 | 30.3 | 10q21.1    | CDK1     | cyclin-dependent kinase 1 isoform 4 [Homo sapiens].                               |
| 850 | NP_001163878.1 | 109  | 12  | 7.6 | 30.3 | 10q21.1    | CDK1     | cyclin-dependent kinase 1 isoform 4 [Homo sapiens].                               |
| 851 | NP_079406.3    | 917  | 103 | 6.9 | 41.9 | 10q22.1    | HKDC1    | putative hexokinase HKDC1 [Homo sapiens].                                         |
| 852 | NP_277033.1    | 921  | 103 | 6.3 | 41.3 | 10q22      | HK1      | hexokinase-1 isoform HKI-ta/tb [Homo sapiens].                                    |
| 853 | NP_277032.1    | 921  | 103 | 6.3 | 41.3 | 10q22      | HK1      | hexokinase-1 isoform HKI-ta/tb [Homo sapiens].                                    |
| 854 | NP_277035.2    | 905  | 101 | 6.5 | 41.9 | 10q22      | HK1      | hexokinase-1 isoform HKI-td [Homo sapiens].                                       |
| 855 | NP_277031.1    | 916  | 102 | 6.2 | 42.1 | 10q22      | HK1      | hexokinase-1 isoform HKI-R [Homo sapiens].                                        |
| 856 | NP_000179.2    | 917  | 102 | 6.4 | 42.0 | 10q22      | HK1      | hexokinase-1 isoform HKI [Homo sapiens].                                          |
| 857 | NP_001213.2    | 495  | 56  | 6.7 | 29.3 | 10q22      | CAMK2G   | calcium/calmodulin-dependent protein kinase type II subunit gamma [Homo sapiens]. |
| 858 | NP_751913.1    | 504  | 57  | 6.9 | 29.0 | 10q22      | CAMK2G   | calcium/calmodulin-dependent protein kinase type II subunit gamma [Homo sapiens]. |
| 859 | NP_751910.1    | 518  | 58  | 6.7 | 28.4 | 10q22      | CAMK2G   | calcium/calmodulin-dependent protein kinase type II subunit gamma [Homo sapiens]. |
| 860 | NP_751911.1    | 556  | 62  | 7.1 | 27.0 | 10q22      | CAMK2G   | calcium/calmodulin-dependent protein kinase type II subunit gamma [Homo sapiens]. |
| 861 | NP_001191421.1 | 539  | 60  | 6.9 | 29.7 | 10q22      | CAMK2G   | calcium/calmodulin-dependent protein kinase type II subunit gamma [Homo sapiens]. |
| 862 | NP_751909.1    | 527  | 59  | 7.5 | 30.2 | 10q22      | CAMK2G   | calcium/calmodulin-dependent protein kinase type II subunit gamma [Homo sapiens]. |
| 863 | NP_006712.2    | 362  | 41  | 6.2 | 35.6 | 10q22      | ADK      | adenosine kinase isoform b [Homo sapiens].                                        |
| 864 | NP_001189379.1 | 305  | 34  | 6.3 | 31.8 | 10q22      | ADK      | adenosine kinase isoform d [Homo sapiens].                                        |
| 865 | NP_001114.2    | 345  | 39  | 6.2 | 37.4 | 10q22      | ADK      | adenosine kinase isoform a [Homo sapiens].                                        |
| 866 | NP_001189378.1 | 327  | 37  | 6.3 | 39.4 | 10q22      | ADK      | adenosine kinase isoform c [Homo sapiens].                                        |
| 867 | NP_004320.2    | 532  | 57  | 7.0 | 38.1 | 10q22.3    | BMPR1A   | bone morphogenetic protein receptor type-1A precursor [Homo sapiens].             |
| 868 | NP_001015880.1 | 619  | 70  | 7.9 | 37.6 | 10q24      | PAPSS2   | bifunctional 3'-phosphoadenosine 5'-phosphosulfate synthase 2 [Homo sapiens].     |
| 869 | NP_004661.2    | 614  | 70  | 7.9 | 36.8 | 10q24      | PAPSS2   | bifunctional 3'-phosphoadenosine 5'-phosphosulfate synthase 2 [Homo sapiens].     |
| 870 | NP_683878.1    | 598  | 64  | 7.3 | 36.1 | 10q23.31   | PANK1    | pantothenate kinase 1 isoform alpha [Homo sapiens].                               |
| 871 | NP_612189.2    | 314  | 36  | 7.5 | 43.0 | 10q23.31   | PANK1    | pantothenate kinase 1 isoform gamma [Homo sapiens].                               |
| 872 | NP_683879.1    | 373  | 42  | 5.9 | 43.7 | 10q23.31   | PANK1    | pantothenate kinase 1 isoform beta [Homo sapiens].                                |
| 873 | NP_689522.2    | 805  | 90  | 5.1 | 28.8 | 10q24.1    | PIK3AP1  | phosphoinositide 3-kinase adapter protein 1 [Homo sapiens].                       |
| 874 | NP_060895.1    | 479  | 54  | 8.3 | 31.7 | 10q24      | PI4K2A   | phosphatidylinositol 4-kinase type 2-alpha [Homo sapiens].                        |
| 875 | NP_001269.3    | 745  | 85  | 6.3 | 38.5 | 10q24-q25  | CHUK     | inhibitor of nuclear factor kappa-B kinase subunit alpha [Homo sapiens].          |
| 876 | NP_055446.2    | 1105 | 122 | 8.5 | 18.5 | 10q24.33   | SH3PXD2A | SH3 and PX domain-containing protein 2A [Homo sapiens].                           |
| 877 | NP_055535.2    | 1235 | 143 | 4.9 | 17.7 | 10q24.33   | SLK      | STE20-like serine/threonine-protein kinase [Homo sapiens].                        |
| 878 | NP_005299.1    | 590  | 68  | 8.0 | 25.9 | 10q26.11   | GRK5     | G protein-coupled receptor kinase 5 [Homo sapiens].                               |



|     |                |      |     |      |      |            |          |                                                                    |
|-----|----------------|------|-----|------|------|------------|----------|--------------------------------------------------------------------|
| 879 | NP_001098991.1 | 844  | 99  | 5.4  | 19.3 | 10q26.3    | JAKMIP3  | janus kinase and microtubule-interacting protein 3 [Homo sapiens]. |
| 880 | NP_775846.2    | 486  | 55  | 6.2  | 31.1 | 10q26.3    | STK32C   | serine/threonine-protein kinase 32C [Homo sapiens].                |
| 881 | NP_689856.6    | 1749 | 191 | 5.8  | 34.1 | 10q26.3    | KNDC1    | protein very KIND isoform a [Homo sapiens].                        |
| 882 | NP_073609.2    | 715  | 81  | 6.4  | 25.6 | 11p15.5    | EPS8L2   | epidermal growth factor receptor kinase substrate 8-like protein 2 |
| 883 | NP_003948.2    | 668  | 75  | 9.1  | 31.6 | 11p15.5    | BRSK2    | serine/threonine-protein kinase BRSK2 isoform 2 [Homo sapiens].    |
| 884 | NP_001243556.1 | 736  | 82  | 9.0  | 30.0 | 11p15.5    | BRSK2    | serine/threonine-protein kinase BRSK2 isoform 1 [Homo sapiens].    |
| 885 | NP_001243558.1 | 674  | 75  | 9.2  | 31.3 | 11p15.5    | BRSK2    | serine/threonine-protein kinase BRSK2 isoform 3 [Homo sapiens].    |
| 886 | NP_001243559.1 | 766  | 85  | 9.1  | 29.4 | 11p15.5    | BRSK2    | serine/threonine-protein kinase BRSK2 isoform 4 [Homo sapiens].    |
| 887 | NP_001165694.1 | 268  | 30  | 6.7  | 36.2 | 11p15.5    | MOB2     | MOB kinase activator 2 isoform 1 [Homo sapiens].                   |
| 888 | NP_443731.2    | 237  | 27  | 6.3  | 34.2 | 11p15.5    | MOB2     | MOB kinase activator 2 isoform 2 [Homo sapiens].                   |
| 889 | NP_000067.1    | 316  | 32  | 5.3  | 41.5 | 11p15.5    | CDKN1C   | cyclin-dependent kinase inhibitor 1C isoform a [Homo sapiens].     |
| 890 | NP_001116102.1 | 305  | 31  | 5.3  | 42.6 | 11p15.5    | CDKN1C   | cyclin-dependent kinase inhibitor 1C isoform b [Homo sapiens].     |
| 891 | NP_001116103.1 | 305  | 31  | 5.3  | 42.6 | 11p15.5    | CDKN1C   | cyclin-dependent kinase inhibitor 1C isoform b [Homo sapiens].     |
| 892 | NP_659477.2    | 261  | 28  | 6.0  | 20.3 | 11p15.4    | PRKCDBP  | protein kinase C delta-binding protein [Homo sapiens].             |
| 893 | NP_112168.1    | 514  | 58  | 6.6  | 27.0 | 11p15.3    | STK33    | serine/threonine-protein kinase 33 [Homo sapiens].                 |
| 894 | NP_003381.1    | 646  | 72  | 6.3  | 24.0 | 11p15.3-p1 | WEE1     | weel-like protein kinase isoform 1 [Homo sapiens].                 |
| 895 | NP_001137448.1 | 432  | 49  | 7.7  | 26.4 | 11p15.3-p1 | WEE1     | weel-like protein kinase isoform 2 [Homo sapiens].                 |
| 896 | NP_001193809.1 | 706  | 77  | 5.1  | 28.2 | 11p15      | MRV11    | protein MRV11 isoform e [Homo sapiens].                            |
| 897 | NP_569056.4    | 912  | 99  | 5.5  | 24.1 | 11p15      | MRV11    | protein MRV11 isoform d [Homo sapiens].                            |
| 898 | NP_001092049.2 | 904  | 98  | 5.4  | 25.1 | 11p15      | MRV11    | protein MRV11 isoform a [Homo sapiens].                            |
| 899 | NP_001093633.1 | 821  | 90  | 5.7  | 22.7 | 11p15      | MRV11    | protein MRV11 isoform b [Homo sapiens].                            |
| 900 | NP_001093637.1 | 597  | 66  | 5.2  | 23.6 | 11p15      | MRV11    | protein MRV11 isoform c [Homo sapiens].                            |
| 901 | NP_001193810.1 | 597  | 66  | 5.2  | 23.6 | 11p15      | MRV11    | protein MRV11 isoform c [Homo sapiens].                            |
| 902 | NP_001243615.1 | 391  | 45  | 8.7  | 30.2 | 11p15.3    | CSNK2A1P | casein kinase 2, alpha 1 polypeptide-like [Homo sapiens].          |
| 903 | NP_002636.2    | 1686 | 191 | 7.9  | 37.7 | 11p15.5-p1 | PIK3C2A  | phosphatidylinositol 4-phosphate 3-kinase C2 domain-containing     |
| 904 | NP_006148.2    | 810  | 88  | 5.7  | 33.4 | 11p15.1    | NELL1    | protein kinase C-binding protein NELL1 isoform 1 precursor [Homo   |
| 905 | NP_963845.1    | 763  | 83  | 5.9  | 34.3 | 11p15.1    | NELL1    | protein kinase C-binding protein NELL1 isoform 2 precursor [Homo   |
| 906 | NP_005725.3    | 1215 | 134 | 7.1  | 34.7 | 11p13      | HIPK3    | homeodomain-interacting protein kinase 3 isoform 1 [Homo sapiens]. |
| 907 | NP_001041665.1 | 1194 | 131 | 7.3  | 34.8 | 11p13      | HIPK3    | homeodomain-interacting protein kinase 3 isoform 2 [Homo sapiens]. |
| 908 | NP_005447.1    | 711  | 78  | 4.7  | 21.7 | 11p11.2    | MAPK8IP1 | C-Jun-amino-terminal kinase-interacting protein 1 [Homo sapiens].  |
| 909 | NP_963290.1    | 945  | 106 | 7.9  | 27.2 | 11p11.2    | DGKZ     | diacylglycerol kinase zeta isoform 1 [Homo sapiens].               |
| 910 | NP_963291.2    | 933  | 104 | 7.5  | 28.1 | 11p11.2    | DGKZ     | diacylglycerol kinase zeta isoform 3 [Homo sapiens].               |
| 911 | NP_001186195.1 | 934  | 105 | 7.9  | 27.9 | 11p11.2    | DGKZ     | diacylglycerol kinase zeta isoform 5 [Homo sapiens].               |
| 912 | NP_003637.2    | 929  | 104 | 7.9  | 28.0 | 11p11.2    | DGKZ     | diacylglycerol kinase zeta isoform 2 [Homo sapiens].               |
| 913 | NP_001186197.1 | 906  | 101 | 7.3  | 28.7 | 11p11.2    | DGKZ     | diacylglycerol kinase zeta isoform 7 [Homo sapiens].               |
| 914 | NP_001186196.1 | 928  | 104 | 7.9  | 28.0 | 11p11.2    | DGKZ     | diacylglycerol kinase zeta isoform 6 [Homo sapiens].               |
| 915 | NP_001099010.1 | 1117 | 124 | 9.2  | 29.5 | 11p11.2    | DGKZ     | diacylglycerol kinase zeta isoform 4 [Homo sapiens].               |
| 916 | NP_057307.2    | 424  | 48  | 5.8  | 12.5 | 11p12-p11. | PAC SIN3 | protein kinase C and casein kinase substrate in neurons protein 3  |
| 917 | NP_001171904.1 | 424  | 48  | 5.8  | 12.5 | 11p12-p11. | PAC SIN3 | protein kinase C and casein kinase substrate in neurons protein 3  |
| 918 | NP_001171903.1 | 424  | 48  | 5.8  | 12.5 | 11p12-p11. | PAC SIN3 | protein kinase C and casein kinase substrate in neurons protein 3  |
| 919 | NP_006822.1    | 425  | 48  | 6.2  | 44.7 | 11q12      | CLP1     | polyribonucleotide 5'-hydroxyl-kinase Clp1 isoform 1 [Homo         |
| 920 | NP_001136069.1 | 361  | 41  | 6.1  | 45.4 | 11q12      | CLP1     | polyribonucleotide 5'-hydroxyl-kinase Clp1 isoform 2 [Homo         |
| 921 | NP_073741.2    | 912  | 98  | 6.0  | 37.4 | 11q12.2    | TUT1     | speckle targeted PIP5K1A-regulated poly(A) polymerase [Homo        |
| 922 | NP_001034558.2 | 788  | 88  | 10.1 | 21.6 | 11q13.1    | MARK2    | serine/threonine-protein kinase MARK2 isoform d [Homo sapiens].    |
| 923 | NP_001156768.1 | 719  | 81  | 10.1 | 22.3 | 11q13.1    | MARK2    | serine/threonine-protein kinase MARK2 isoform e [Homo sapiens].    |
| 924 | NP_004945.4    | 724  | 81  | 9.9  | 22.2 | 11q13.1    | MARK2    | serine/threonine-protein kinase MARK2 isoform c [Homo sapiens].    |
| 925 | NP_001156769.1 | 709  | 79  | 10.0 | 22.4 | 11q13.1    | MARK2    | serine/threonine-protein kinase MARK2 isoform f [Homo sapiens].    |
| 926 | NP_059672.2    | 745  | 83  | 10.0 | 22.6 | 11q13.1    | MARK2    | serine/threonine-protein kinase MARK2 isoform a [Homo sapiens].    |
| 927 | NP_003933.1    | 772  | 86  | 8.2  | 34.7 | 11q11-q13  | RPS6KA4  | ribosomal protein S6 kinase alpha-4 isoform a [Homo sapiens].      |
| 928 | NP_001006945.1 | 766  | 85  | 8.4  | 34.9 | 11q11-q13  | RPS6KA4  | ribosomal protein S6 kinase alpha-4 isoform b [Homo sapiens].      |
| 929 | NP_004570.2    | 820  | 92  | 5.9  | 39.4 | 11q13      | MAP4K2   | mitogen-activated protein kinase kinase kinase 2 [Homo             |
| 930 | NP_059995.2    | 1551 | 172 | 5.9  | 30.9 | 11q13.1    | CDC42BPG | serine/threonine-protein kinase MRCK gamma [Homo sapiens].         |
| 931 | NP_065731.3    | 808  | 90  | 5.9  | 30.9 | 11q13      | SCYL1    | N-terminal kinase-like protein isoform A [Homo sapiens].           |
| 932 | NP_001041683.1 | 791  | 88  | 5.9  | 31.2 | 11q13      | SCYL1    | N-terminal kinase-like protein isoform B [Homo sapiens].           |
| 933 | NP_002410.1    | 847  | 93  | 8.0  | 28.2 | 11q13.1-q1 | MAP3K11  | mitogen-activated protein kinase kinase kinase 11 [Homo sapiens].  |
| 934 | NP_001610.2    | 689  | 80  | 6.9  | 29.2 | 11q13.1    | ADRBK1   | beta-adrenergic receptor kinase 1 [Homo sapiens].                  |
| 935 | NP_003943.2    | 482  | 53  | 7.0  | 32.8 | 11q13.2    | RPS6KB2  | ribosomal protein S6 kinase beta-2 [Homo sapiens].                 |
| 936 | NP_005842.1    | 126  | 13  | 9.8  | 26.2 | 11q13      | CDK2AP2  | cyclin-dependent kinase 2-associated protein 2 [Homo sapiens].     |
| 937 | NP_997634.1    | 439  | 50  | 6.3  | 35.5 | 11q13.2    | CHKA     | choline kinase alpha isoform b [Homo sapiens].                     |

|     |                |      |     |     |      |            |         |                                                                     |
|-----|----------------|------|-----|-----|------|------------|---------|---------------------------------------------------------------------|
| 938 | NP_001268.2    | 457  | 52  | 6.1 | 33.9 | 11q13.2    | CHKA    | choline kinase alpha isoform a [Homo sapiens].                      |
| 939 | NP_004696.2    | 761  | 88  | 5.5 | 37.8 | 11q13.5    | PRKRIR  | 52 kDa repressor of the inhibitor of the protein kinase [Homo       |
| 940 | NP_002567.3    | 545  | 61  | 5.5 | 33.2 | 11q13-q14  | PAK1    | serine/threonine-protein kinase PAK 1 isoform 2 [Homo sapiens].     |
| 941 | NP_001122092.1 | 553  | 62  | 5.2 | 32.4 | 11q13-q14  | PAK1    | serine/threonine-protein kinase PAK 1 isoform 1 [Homo sapiens].     |
| 942 | NP_000042.3    | 3056 | 351 | 6.4 | 41.1 | 11q22-q23  | ATM     | serine-protein kinase ATM [Homo sapiens].                           |
| 943 | NP_056006.1    | 926  | 104 | 5.6 | 27.8 | 11q23.1    | SIK2    | serine/threonine-protein kinase SIK2 [Homo sapiens].                |
| 944 | NP_848605.1    | 765  | 85  | 6.6 | 43.0 | 11q23.2    | ANKK1   | ankyrin repeat and protein kinase domain-containing protein 1 [Homo |
| 945 | NP_079440.2    | 1263 | 140 | 6.2 | 27.1 | 11q23.3    | SIK3    | serine/threonine-protein kinase SIK3 [Homo sapiens].                |
| 946 | NP_006167.1    | 78   | 8   | 8.0 | 25.6 | 11q24      | NRGN    | neurogranin [Homo sapiens].                                         |
| 947 | NP_001119653.1 | 78   | 8   | 8.0 | 25.6 | 11q24      | NRGN    | neurogranin [Homo sapiens].                                         |
| 948 | NP_001107593.1 | 476  | 54  | 8.2 | 29.6 | 11q24.2    | CHEK1   | serine/threonine-protein kinase Chk1 isoform 1 [Homo sapiens].      |
| 949 | NP_001107594.1 | 476  | 54  | 8.2 | 29.6 | 11q24.2    | CHEK1   | serine/threonine-protein kinase Chk1 isoform 1 [Homo sapiens].      |
| 950 | NP_001265.2    | 476  | 54  | 8.2 | 29.6 | 11q24.2    | CHEK1   | serine/threonine-protein kinase Chk1 isoform 1 [Homo sapiens].      |
| 951 | NP_001231775.1 | 442  | 50  | 7.9 | 28.3 | 11q24.2    | CHEK1   | serine/threonine-protein kinase Chk1 isoform 2 [Homo sapiens].      |
| 952 | NP_998820.3    | 2634 | 280 | 6.0 | 34.5 | 12p13.3    | WNK1    | serine/threonine-protein kinase WNK1 isoform 3 [Homo sapiens].      |
| 953 | NP_001171914.1 | 2642 | 280 | 5.9 | 34.4 | 12p13.3    | WNK1    | serine/threonine-protein kinase WNK1 isoform 4 [Homo sapiens].      |
| 954 | NP_061852.3    | 2382 | 251 | 5.9 | 36.6 | 12p13.3    | WNK1    | serine/threonine-protein kinase WNK1 isoform 1 [Homo sapiens].      |
| 955 | NP_055638.2    | 2134 | 226 | 6.0 | 33.3 | 12p13.3    | WNK1    | serine/threonine-protein kinase WNK1 isoform 2 [Homo sapiens].      |
| 956 | NP_003836.1    | 520  | 60  | 9.1 | 32.7 | 12p13.32   | DYRK4   | dual specificity tyrosine-phosphorylation-regulated kinase 4 [Homo  |
| 957 | NP_006413.2    | 853  | 95  | 5.8 | 30.9 | 12p13.3    | AKAP3   | A-kinase anchor protein 3 [Homo sapiens].                           |
| 958 | NP_060893.2    | 422  | 48  | 7.1 | 48.6 | 12p13.2    | STYK1   | tyrosine-protein kinase STYK1 [Homo sapiens].                       |
| 959 | NP_085143.1    | 665  | 73  | 7.2 | 34.4 | 12p13      | DUSP16  | dual specificity protein phosphatase 16 [Homo sapiens].             |
| 960 | NP_004055.1    | 198  | 22  | 6.6 | 7.1  | 12p13.1-p1 | CDKN1B  | cyclin-dependent kinase inhibitor 1B [Homo sapiens].                |
| 961 | NP_004438.3    | 822  | 92  | 7.2 | 25.3 | 12p12.3    | EPS8    | epidermal growth factor receptor kinase substrate 8 [Homo sapiens]. |
| 962 | NP_009109.3    | 350  | 38  | 4.8 | 34.3 | 12p12.3    | STRAP   | serine-threonine kinase receptor-associated protein [Homo sapiens]. |
| 963 | NP_004561.3    | 1445 | 166 | 6.5 | 37.8 | 12p12      | PIK3C2G | phosphatidylinositol 4-phosphate 3-kinase C2 domain-containing      |
| 964 | NP_061108.2    | 452  | 51  | 6.1 | 41.6 | 12p12.1    | ETNK1   | ethanolamine kinase 1 isoform A [Homo sapiens].                     |
| 965 | NP_001034570.1 | 258  | 28  | 8.4 | 41.9 | 12p12.1    | ETNK1   | ethanolamine kinase 1 isoform B [Homo sapiens].                     |
| 966 | NP_055815.1    | 464  | 54  | 6.4 | 27.6 | 12p11.23   | STK38L  | serine/threonine-protein kinase 38-like [Homo sapiens].             |
| 967 | NP_940980.3    | 2527 | 286 | 6.3 | 46.7 | 12q12      | LRRK2   | leucine-rich repeat serine/threonine-protein kinase 2 [Homo         |
| 968 | NP_001107654.1 | 460  | 52  | 5.1 | 36.3 | 12q12      | IRAK4   | interleukin-1 receptor-associated kinase 4 isoform a [Homo          |
| 969 | NP_057207.2    | 460  | 52  | 5.1 | 36.3 | 12q12      | IRAK4   | interleukin-1 receptor-associated kinase 4 isoform a [Homo          |
| 970 | NP_001138728.1 | 336  | 38  | 4.8 | 33.9 | 12q12      | IRAK4   | interleukin-1 receptor-associated kinase 4 isoform b [Homo          |
| 971 | NP_001138729.1 | 336  | 38  | 4.8 | 33.9 | 12q12      | IRAK4   | interleukin-1 receptor-associated kinase 4 isoform b [Homo          |
| 972 | NP_001138730.1 | 336  | 38  | 4.8 | 33.9 | 12q12      | IRAK4   | interleukin-1 receptor-associated kinase 4 isoform b [Homo          |
| 973 | NP_002813.3    | 350  | 40  | 6.5 | 22.9 | 12q12      | TWF1    | twinfilin-1 isoform 2 [Homo sapiens].                               |
| 974 | NP_001229326.1 | 357  | 41  | 6.3 | 23.2 | 12q12      | TWF1    | twinfilin-1 isoform 1 [Homo sapiens].                               |
| 975 | NP_001138582.1 | 839  | 94  | 5.6 | 30.3 | 12q12      | NELL2   | protein kinase C-binding protein NELL2 isoform d [Homo sapiens].    |
| 976 | NP_001138579.1 | 866  | 97  | 5.5 | 30.5 | 12q12      | NELL2   | protein kinase C-binding protein NELL2 isoform a [Homo sapiens].    |
| 977 | NP_006150.1    | 816  | 89  | 5.3 | 28.1 | 12q12      | NELL2   | protein kinase C-binding protein NELL2 isoform b precursor [Homo    |
| 978 | NP_001138580.1 | 816  | 89  | 5.3 | 28.1 | 12q12      | NELL2   | protein kinase C-binding protein NELL2 isoform b precursor [Homo    |
| 979 | NP_001138581.1 | 815  | 91  | 5.3 | 29.8 | 12q12      | NELL2   | protein kinase C-binding protein NELL2 isoform c precursor [Homo    |
| 980 | NP_001160158.1 | 851  | 93  | 7.8 | 43.0 | 12q13.3    | PFKM    | 6-phosphofructokinase, muscle type isoform 1 [Homo sapiens].        |
| 981 | NP_000280.1    | 780  | 85  | 7.9 | 43.6 | 12q13.3    | PFKM    | 6-phosphofructokinase, muscle type isoform 2 [Homo sapiens].        |
| 982 | NP_001160159.1 | 780  | 85  | 7.9 | 43.6 | 12q13.3    | PFKM    | 6-phosphofructokinase, muscle type isoform 2 [Homo sapiens].        |
| 983 | NP_001160160.1 | 780  | 85  | 7.9 | 43.6 | 12q13.3    | PFKM    | 6-phosphofructokinase, muscle type isoform 2 [Homo sapiens].        |
| 984 | NP_002724.1    | 331  | 38  | 6.5 | 53.5 | 12q12-q14  | PRKAG1  | 5'-AMP-activated protein kinase subunit gamma-1 isoform 1 [Homo     |
| 985 | NP_001193638.1 | 340  | 39  | 6.7 | 54.7 | 12q12-q14  | PRKAG1  | 5'-AMP-activated protein kinase subunit gamma-1 isoform 3 [Homo     |
| 986 | NP_001193639.1 | 299  | 34  | 8.7 | 57.9 | 12q12-q14  | PRKAG1  | 5'-AMP-activated protein kinase subunit gamma-1 isoform 4 [Homo     |
| 987 | NP_000011.2    | 503  | 54  | 7.0 | 37.6 | 12q13.13   | ACVRL1  | serine/threonine-protein kinase receptor R3 precursor [Homo         |
| 988 | NP_001070869.1 | 503  | 54  | 7.0 | 37.6 | 12q13.13   | ACVRL1  | serine/threonine-protein kinase receptor R3 precursor [Homo         |
| 989 | NP_064733.3    | 546  | 59  | 7.8 | 39.4 | 12q13      | ACVR1B  | activin receptor type-1B isoform c precursor [Homo sapiens].        |
| 990 | NP_004293.1    | 505  | 55  | 6.8 | 38.4 | 12q13      | ACVR1B  | activin receptor type-1B isoform a precursor [Homo sapiens].        |
| 991 | NP_064732.3    | 453  | 52  | 7.0 | 36.4 | 12q13      | ACVR1B  | activin receptor type-1B isoform b [Homo sapiens].                  |
| 992 | NP_006292.3    | 859  | 93  | 6.0 | 26.9 | 12q13      | MAP3K12 | mitogen-activated protein kinase kinase kinase 12 isoform 2 [Homo   |
| 993 | NP_001180440.1 | 892  | 96  | 5.9 | 27.4 | 12q13      | MAP3K12 | mitogen-activated protein kinase kinase kinase 12 isoform 1 [Homo   |
| 994 | NP_001336.2    | 735  | 83  | 6.3 | 37.6 | 12q13.3    | DGKA    | diacylglycerol kinase alpha [Homo sapiens].                         |
| 995 | NP_958852.1    | 735  | 83  | 6.3 | 37.6 | 12q13.3    | DGKA    | diacylglycerol kinase alpha [Homo sapiens].                         |
| 996 | NP_958853.1    | 735  | 83  | 6.3 | 37.6 | 12q13.3    | DGKA    | diacylglycerol kinase alpha [Homo sapiens].                         |

|      |                |      |     |      |      |            |          |                                                                    |
|------|----------------|------|-----|------|------|------------|----------|--------------------------------------------------------------------|
| 997  | NP_963848.1    | 735  | 83  | 6.3  | 37.6 | 12q13.3    | DGKA     | diacylglycerol kinase alpha [Homo sapiens].                        |
| 998  | NP_001789.2    | 298  | 34  | 9.0  | 47.7 | 12q13      | CDK2     | cyclin-dependent kinase 2 isoform 1 [Homo sapiens].                |
| 999  | NP_439892.2    | 264  | 30  | 9.5  | 41.7 | 12q13      | CDK2     | cyclin-dependent kinase 2 isoform 2 [Homo sapiens].                |
| 1000 | NP_001973.2    | 1342 | 146 | 6.1  | 32.2 | 12q13      | ERBB3    | receptor tyrosine-protein kinase erbB-3 isoform 1 precursor [Homo  |
| 1001 | NP_001005915.1 | 183  | 18  | 4.9  | 50.0 | 12q13      | ERBB3    | receptor tyrosine-protein kinase erbB-3 isoform s precursor [Homo  |
| 1002 | NP_079055.3    | 421  | 47  | 6.4  | 30.2 | 12q13.3    | PIP4K2C  | phosphatidylinositol 5-phosphate 4-kinase type-2 gamma isoform a   |
| 1003 | NP_001139730.1 | 421  | 47  | 6.4  | 30.2 | 12q13.3    | PIP4K2C  | phosphatidylinositol 5-phosphate 4-kinase type-2 gamma isoform a   |
| 1004 | NP_001139732.1 | 373  | 42  | 7.1  | 32.4 | 12q13.3    | PIP4K2C  | phosphatidylinositol 5-phosphate 4-kinase type-2 gamma isoform c   |
| 1005 | NP_001139731.1 | 403  | 45  | 6.0  | 31.8 | 12q13.3    | PIP4K2C  | phosphatidylinositol 5-phosphate 4-kinase type-2 gamma isoform b   |
| 1006 | NP_055585.1    | 836  | 91  | 8.9  | 31.9 | 12q14.1    | AGAP2    | arf-GAP with GTPase, ANK repeat and PH domain-containing protein 2 |
| 1007 | NP_001116244.1 | 1192 | 125 | 10.3 | 29.5 | 12q14.1    | AGAP2    | arf-GAP with GTPase, ANK repeat and PH domain-containing protein 2 |
| 1008 | NP_000066.1    | 303  | 34  | 6.6  | 44.2 | 12q14      | CDK4     | cyclin-dependent kinase 4 [Homo sapiens].                          |
| 1009 | NP_037386.1    | 729  | 84  | 6.3  | 35.8 | 12q14.1    | TBK1     | serine/threonine-protein kinase TBK1 [Homo sapiens].               |
| 1010 | NP_009130.2    | 596  | 68  | 6.2  | 35.1 | 12q14.3    | IRAK3    | interleukin-1 receptor-associated kinase 3 isoform a [Homo         |
| 1011 | NP_001135995.1 | 535  | 61  | 5.9  | 37.0 | 12q14.3    | IRAK3    | interleukin-1 receptor-associated kinase 3 isoform b [Homo         |
| 1012 | NP_006473.2    | 601  | 67  | 10.0 | 29.6 | 12q15      | DYRK2    | dual specificity tyrosine-phosphorylation-regulated kinase 2       |
| 1013 | NP_003574.1    | 528  | 60  | 9.8  | 28.0 | 12q15      | DYRK2    | dual specificity tyrosine-phosphorylation-regulated kinase 2       |
| 1014 | NP_073143.2    | 235  | 26  | 5.4  | 35.3 | 12q22-q23  | DUSP6    | dual specificity protein phosphatase 6 isoform b [Homo sapiens].   |
| 1015 | NP_001937.2    | 381  | 42  | 4.6  | 35.2 | 12q22-q23  | DUSP6    | dual specificity protein phosphatase 6 isoform a [Homo sapiens].   |
| 1016 | NP_002586.2    | 523  | 60  | 9.3  | 23.9 | 12q23.1    | CDK17    | cyclin-dependent kinase 17 isoform 1 [Homo sapiens].               |
| 1017 | NP_001163935.1 | 523  | 60  | 9.0  | 25.6 | 12q23.1    | CDK17    | cyclin-dependent kinase 17 isoform 2 [Homo sapiens].               |
| 1018 | NP_963906.1    | 350  | 39  | 9.7  | 25.4 | 12q23.1    | IKBIP    | inhibitor of nuclear factor kappa-B kinase-interacting protein     |
| 1019 | NP_963907.1    | 70   | 7   | 10.6 | 24.3 | 12q23.1    | IKBIP    | inhibitor of nuclear factor kappa-B kinase-interacting protein     |
| 1020 | NP_710154.1    | 377  | 43  | 4.7  | 15.4 | 12q23.1    | IKBIP    | inhibitor of nuclear factor kappa-B kinase-interacting protein     |
| 1021 | NP_060458.3    | 929  | 104 | 8.2  | 39.6 | 12q23.1    | SCYL2    | SCYL1-like protein 2 [Homo sapiens].                               |
| 1022 | NP_055655.1    | 661  | 74  | 9.0  | 23.0 | 12q23.3    | NUAK1    | NUAK family SNF1-like kinase 1 [Homo sapiens].                     |
| 1023 | NP_000422.1    | 396  | 42  | 6.0  | 48.0 | 12q24      | MVK      | mevalonate kinase [Homo sapiens].                                  |
| 1024 | NP_001107657.1 | 396  | 42  | 6.0  | 48.0 | 12q24      | MVK      | mevalonate kinase [Homo sapiens].                                  |
| 1025 | NP_620777.1    | 473  | 54  | 7.6  | 32.3 | 12q24.13   | MAPKAPK5 | MAP kinase-activated protein kinase 5 isoform 2 [Homo sapiens].    |
| 1026 | NP_003659.2    | 471  | 54  | 7.3  | 32.7 | 12q24.13   | MAPKAPK5 | MAP kinase-activated protein kinase 5 isoform 1 [Homo sapiens].    |
| 1027 | NP_775869.3    | 921  | 104 | 9.0  | 26.1 | 12q24.22-q | KSR2     | kinase suppressor of Ras 2 [Homo sapiens].                         |
| 1028 | NP_002558.1    | 187  | 1   | 7.1  | 0.0  | 12q24.23   | PEBP1    | phosphatidylethanolamine-binding protein 1 preproprotein [Homo     |
| 1029 | NP_057365.3    | 898  | 105 | 6.9  | 19.8 | 12q        | TAOK3    | serine/threonine-protein kinase TAO3 [Homo sapiens].               |
| 1030 | NP_055180.1    | 196  | 22  | 4.9  | 20.4 | 12q24.23   | HSPB8    | heat shock protein beta-8 [Homo sapiens].                          |
| 1031 | NP_006244.2    | 270  | 30  | 5.9  | 25.2 | 12q24.1-q2 | PRKAB1   | 5'-AMP-activated protein kinase subunit beta-1 [Homo sapiens].     |
| 1032 | NP_009105.1    | 2027 | 231 | 6.1  | 25.7 | 12q24      | CIT      | citron Rho-interacting kinase isoform 2 [Homo sapiens].            |
| 1033 | NP_001193928.1 | 2069 | 237 | 6.2  | 25.3 | 12q24      | CIT      | citron Rho-interacting kinase isoform 1 [Homo sapiens].            |
| 1034 | NP_001257415.1 | 556  | 61  | 6.4  | 32.7 | 12q24.2    | CAMKK2   | calcium/calmodulin-dependent protein kinase kinase 2 isoform 7     |
| 1035 | NP_757365.1    | 545  | 60  | 7.4  | 32.3 | 12q24.2    | CAMKK2   | calcium/calmodulin-dependent protein kinase kinase 2 isoform 3     |
| 1036 | NP_006540.3    | 588  | 65  | 6.2  | 31.8 | 12q24.2    | CAMKK2   | calcium/calmodulin-dependent protein kinase kinase 2 isoform 1     |
| 1037 | NP_001257414.1 | 588  | 65  | 6.2  | 31.8 | 12q24.2    | CAMKK2   | calcium/calmodulin-dependent protein kinase kinase 2 isoform 1     |
| 1038 | NP_705720.1    | 498  | 55  | 5.9  | 32.9 | 12q24.2    | CAMKK2   | calcium/calmodulin-dependent protein kinase kinase 2 isoform 4     |
| 1039 | NP_757380.1    | 541  | 60  | 5.4  | 32.3 | 12q24.2    | CAMKK2   | calcium/calmodulin-dependent protein kinase kinase 2 isoform 2     |
| 1040 | NP_705719.2    | 541  | 60  | 5.4  | 32.3 | 12q24.2    | CAMKK2   | calcium/calmodulin-dependent protein kinase kinase 2 isoform 2     |
| 1041 | NP_757364.1    | 490  | 54  | 6.8  | 33.3 | 12q24.2    | CAMKK2   | calcium/calmodulin-dependent protein kinase kinase 2 isoform 6     |
| 1042 | NP_757363.1    | 533  | 59  | 5.9  | 32.6 | 12q24.2    | CAMKK2   | calcium/calmodulin-dependent protein kinase kinase 2 isoform 5     |
| 1043 | NP_004633.1    | 115  | 12  | 9.7  | 24.3 | 12q24.31   | CDK2AP1  | cyclin-dependent kinase 2-associated protein 1 isoform 1 [Homo     |
| 1044 | NP_001257362.1 | 87   | 10  | 9.5  | 17.2 | 12q24.31   | CDK2AP1  | cyclin-dependent kinase 2-associated protein 1 isoform 2 [Homo     |
| 1045 | NP_001257363.1 | 87   | 10  | 9.5  | 17.2 | 12q24.31   | CDK2AP1  | cyclin-dependent kinase 2-associated protein 1 isoform 2 [Homo     |
| 1046 | NP_003556.1    | 1050 | 113 | 8.8  | 35.8 | 12q24.3    | ULK1     | serine/threonine-protein kinase ULK1 [Homo sapiens].               |
| 1047 | NP_055387.2    | 1088 | 120 | 8.1  | 25.2 | 13q11-q12  | LATS2    | serine/threonine-protein kinase LATS2 [Homo sapiens].              |
| 1048 | NP_001251.1    | 464  | 53  | 8.7  | 29.7 | 13q12      | CDK8     | cyclin-dependent kinase 8 [Homo sapiens].                          |
| 1049 | NP_004110.2    | 993  | 113 | 5.4  | 39.4 | 13q12      | FLT3     | receptor-type tyrosine-protein kinase FLT3 [Homo sapiens].         |
| 1050 | NP_002010.2    | 1338 | 148 | 8.4  | 33.3 | 13q12      | FLT1     | vascular endothelial growth factor receptor 1 isoform 1 precursor  |
| 1051 | NP_001153502.1 | 733  | 79  | 9.4  | 32.4 | 13q12      | FLT1     | vascular endothelial growth factor receptor 1 isoform 3 precursor  |
| 1052 | NP_001153392.1 | 687  | 75  | 9.8  | 33.1 | 13q12      | FLT1     | vascular endothelial growth factor receptor 1 isoform 2 precursor  |
| 1053 | NP_001153503.1 | 541  | 58  | 9.7  | 32.8 | 13q12      | FLT1     | vascular endothelial growth factor receptor 1 isoform 4 precursor  |
| 1054 | NP_001182345.1 | 433  | 48  | 5.4  | 36.3 | 13q13      | DCLK1    | serine/threonine-protein kinase DCLK1 isoform 3 [Homo sapiens].    |
| 1055 | NP_004725.1    | 729  | 81  | 8.8  | 32.9 | 13q13      | DCLK1    | serine/threonine-protein kinase DCLK1 isoform 1 [Homo sapiens].    |

|      |                |      |     |     |      |            |           |                                                                   |
|------|----------------|------|-----|-----|------|------------|-----------|-------------------------------------------------------------------|
| 1056 | NP_001182344.1 | 422  | 47  | 5.5 | 38.6 | 13q13      | DCLK1     | serine/threonine-protein kinase DCLK1 isoform 2 [Homo sapiens].   |
| 1057 | NP_001182359.1 | 56   | 6   | 4.8 | 5.4  | 13q13      | DCLK1     | serine/threonine-protein kinase DCLK1 isoform 4 [Homo sapiens].   |
| 1058 | NP_660204.2    | 337  | 39  | 9.8 | 32.0 | 13q13.3    | CSNK1A1L  | casein kinase I isoform alpha-like [Homo sapiens].                |
| 1059 | NP_821077.1    | 1220 | 135 | 6.1 | 36.5 | 13q14.11   | DGKH      | diacylglycerol kinase eta isoform 2 [Homo sapiens].               |
| 1060 | NP_001191433.1 | 1164 | 128 | 5.9 | 36.6 | 13q14.11   | DGKH      | diacylglycerol kinase eta isoform 1 [Homo sapiens].               |
| 1061 | NP_690874.2    | 1164 | 128 | 5.9 | 36.6 | 13q14.11   | DGKH      | diacylglycerol kinase eta isoform 1 [Homo sapiens].               |
| 1062 | NP_001191434.1 | 1100 | 122 | 5.9 | 36.7 | 13q14.11   | DGKH      | diacylglycerol kinase eta isoform 3 [Homo sapiens].               |
| 1063 | NP_001191435.1 | 1084 | 121 | 5.8 | 37.2 | 13q14.11   | DGKH      | diacylglycerol kinase eta isoform 4 [Homo sapiens].               |
| 1064 | NP_057332.1    | 1901 | 211 | 5.1 | 29.8 | 13q14.11   | AKAP11    | A-kinase anchor protein 11 [Homo sapiens].                        |
| 1065 | NP_001180407.1 | 491  | 56  | 7.7 | 32.2 | 13q14.2    | CDADC1    | cytidine and dCMP deaminase domain-containing protein 1 isoform 2 |
| 1066 | NP_112173.1    | 514  | 58  | 7.9 | 30.7 | 13q14.2    | CDADC1    | cytidine and dCMP deaminase domain-containing protein 1 isoform 1 |
| 1067 | XP_003118937.1 | 149  | 17  | 4.0 | 12.8 | 13q14.2    | LOC100506 | PREDICTED: serine/threonine-protein kinase Nek5-like [Homo        |
| 1068 | NP_954983.1    | 708  | 81  | 9.0 | 25.0 | 13q14.3    | NEK5      | serine/threonine-protein kinase Nek5 [Homo sapiens].              |
| 1069 | NP_001139571.1 | 489  | 56  | 6.6 | 31.7 | 13q14.13   | NEK3      | serine/threonine-protein kinase Nek3 isoform b [Homo sapiens].    |
| 1070 | NP_689933.1    | 506  | 58  | 6.8 | 31.6 | 13q14.13   | NEK3      | serine/threonine-protein kinase Nek3 isoform a [Homo sapiens].    |
| 1071 | NP_006251.1    | 504  | 58  | 5.8 | 22.2 | 13q32.1    | DNAJC3    | dnaJ homolog subfamily C member 3 precursor [Homo sapiens].       |
| 1072 | NP_001027467.2 | 431  | 48  | 5.2 | 31.1 | 13q31.2-q3 | STK24     | serine/threonine-protein kinase 24 isoform b [Homo sapiens].      |
| 1073 | NP_003567.2    | 443  | 49  | 5.4 | 31.2 | 13q31.2-q3 | STK24     | serine/threonine-protein kinase 24 isoform a [Homo sapiens].      |
| 1074 | NP_004084.1    | 333  | 34  | 8.7 | 28.4 | 13q33      | EFNB2     | ephrin-B2 precursor [Homo sapiens].                               |
| 1075 | NP_001185879.1 | 1880 | 209 | 6.4 | 34.7 | 13q33.3    | MYO16     | unconventional myosin-XVI isoform 1 [Homo sapiens].               |
| 1076 | NP_055826.1    | 1858 | 206 | 6.4 | 34.6 | 13q33.3    | MYO16     | unconventional myosin-XVI isoform 2 [Homo sapiens].               |
| 1077 | NP_001229812.1 | 237  | 25  | 6.5 | 45.6 | 13q34      | CARKD     | ATP-dependent (S)-NAD(P)H-hydrate dehydratase isoform d [Homo     |
| 1078 | NP_001229811.1 | 329  | 35  | 8.6 | 52.6 | 13q34      | CARKD     | ATP-dependent (S)-NAD(P)H-hydrate dehydratase isoform c [Homo     |
| 1079 | NP_001229810.1 | 347  | 37  | 8.0 | 57.1 | 13q34      | CARKD     | ATP-dependent (S)-NAD(P)H-hydrate dehydratase isoform b [Homo     |
| 1080 | NP_060680.2    | 390  | 41  | 9.4 | 49.0 | 13q34      | CARKD     | ATP-dependent (S)-NAD(P)H-hydrate dehydratase isoform a [Homo     |
| 1081 | NP_000811.1    | 678  | 72  | 5.3 | 34.1 | 13q34      | GAS6      | growth arrest-specific protein 6 isoform 1 precursor [Homo        |
| 1082 | NP_001137417.1 | 405  | 45  | 6.0 | 46.4 | 13q34      | GAS6      | growth arrest-specific protein 6 isoform 2 [Homo sapiens].        |
| 1083 | NP_001137418.1 | 379  | 42  | 6.0 | 43.0 | 13q34      | GAS6      | growth arrest-specific protein 6 isoform 3 [Homo sapiens].        |
| 1084 | NP_004554.2    | 640  | 67  | 6.6 | 35.4 | 14q11.2    | PCK2      | phosphoenolpyruvate carboxykinase [GTP], mitochondrial isoform 1  |
| 1085 | NP_001018083.1 | 441  | 44  | 7.0 | 40.8 | 14q11.2    | PCK2      | phosphoenolpyruvate carboxykinase [GTP], mitochondrial isoform 2  |
| 1086 | NP_001171668.1 | 338  | 38  | 8.8 | 38.5 | 14q12      | TSSK4     | testis-specific serine/threonine-protein kinase 4 isoform 1 [Homo |
| 1087 | NP_777604.2    | 328  | 37  | 8.7 | 36.9 | 14q12      | TSSK4     | testis-specific serine/threonine-protein kinase 4 isoform 2 [Homo |
| 1088 | NP_006862.2    | 518  | 57  | 6.1 | 29.5 | 14q11.2    | RIPK3     | receptor-interacting serine/threonine-protein kinase 3 [Homo      |
| 1089 | NP_002733.2    | 912  | 102 | 6.2 | 38.0 | 14q11      | PRKD1     | serine/threonine-protein kinase D1 [Homo sapiens].                |
| 1090 | NP_004265.3    | 2319 | 257 | 4.8 | 20.8 | 14q12      | AKAP6     | A-kinase anchor protein 6 [Homo sapiens].                         |
| 1091 | NP_004187.2    | 358  | 42  | 9.0 | 29.3 | 14q21.3    | CDKL1     | cyclin-dependent kinase-like 1 [Homo sapiens].                    |
| 1092 | NP_942089.1    | 846  | 95  | 7.5 | 36.5 | 14q11.2-q2 | MAP4K5    | mitogen-activated protein kinase kinase kinase kinase 5 [Homo     |
| 1093 | NP_006566.2    | 846  | 95  | 7.5 | 36.5 | 14q11.2-q2 | MAP4K5    | mitogen-activated protein kinase kinase kinase kinase 5 [Homo     |
| 1094 | NP_065972.3    | 2133 | 248 | 4.9 | 15.2 | 14q22.1    | NIN       | ninein isoform 2 [Homo sapiens].                                  |
| 1095 | NP_057434.4    | 1377 | 160 | 5.0 | 13.4 | 14q22.1    | NIN       | ninein isoform 6 [Homo sapiens].                                  |
| 1096 | NP_891991.1    | 2090 | 243 | 4.8 | 14.7 | 14q22.1    | NIN       | ninein isoform 5 [Homo sapiens].                                  |
| 1097 | NP_891989.2    | 2046 | 238 | 4.8 | 14.4 | 14q22.1    | NIN       | ninein isoform 1 [Homo sapiens].                                  |
| 1098 | NP_005183.2    | 212  | 24  | 6.0 | 36.8 | 14q22      | CDKN3     | cyclin-dependent kinase inhibitor 3 isoform 1 [Homo sapiens].     |
| 1099 | NP_001124323.1 | 172  | 19  | 7.9 | 32.6 | 14q22      | CDKN3     | cyclin-dependent kinase inhibitor 3 isoform 2 [Homo sapiens].     |
| 1100 | NP_653179.1    | 245  | 24  | 5.2 | 11.8 | 14q22.3    | MAPK1IP1L | MAPK-interacting and spindle-stabilizing protein-like [Homo       |
| 1101 | NP_057559.2    | 311  | 35  | 7.6 | 65.0 | 14q23.1    | JKAMP     | JNK1/MAPK8-associated membrane protein isoform 1 [Homo sapiens].  |
| 1102 | NP_001092095.1 | 305  | 35  | 7.8 | 64.3 | 14q23.1    | JKAMP     | JNK1/MAPK8-associated membrane protein isoform 2 [Homo sapiens].  |
| 1103 | NP_002422.1    | 309  | 36  | 5.7 | 24.9 | 14q23      | MNAT1     | CDK-activating kinase assembly factor MAT1 isoform 1 [Homo        |
| 1104 | NP_001171434.1 | 267  | 31  | 5.5 | 22.8 | 14q23      | MNAT1     | CDK-activating kinase assembly factor MAT1 isoform 2 [Homo        |
| 1105 | NP_006246.2    | 683  | 78  | 7.6 | 37.5 | 14q23.1    | PRKCH     | protein kinase C eta type [Homo sapiens].                         |
| 1106 | NP_004848.3    | 427  | 47  | 4.7 | 15.7 | 14q23.3    | AKAP5     | A-kinase anchor protein 5 [Homo sapiens].                         |
| 1107 | NP_149132.2    | 1118 | 123 | 5.5 | 31.6 | 14q24.2    | MAP3K9    | mitogen-activated protein kinase kinase kinase 9 [Homo sapiens].  |
| 1108 | NP_149107.4    | 979  | 107 | 5.4 | 34.8 | 14q24.3    | NEK9      | serine/threonine-protein kinase Nek9 [Homo sapiens].              |
| 1109 | NP_065154.2    | 523  | 60  | 8.6 | 41.9 | 14q24.3    | ADCK1     | uncharacterized aarF domain-containing protein kinase 1 isoform a |
| 1110 | NP_001136017.1 | 455  | 52  | 8.8 | 42.9 | 14q24.3    | ADCK1     | uncharacterized aarF domain-containing protein kinase 1 isoform b |
| 1111 | NP_004746.2    | 802  | 90  | 6.6 | 33.4 | 14q31-q32  | RPS6KA5   | ribosomal protein S6 kinase alpha-5 isoform a [Homo sapiens].     |
| 1112 | NP_872198.1    | 549  | 62  | 6.4 | 36.8 | 14q31-q32  | RPS6KA5   | ribosomal protein S6 kinase alpha-5 isoform b [Homo sapiens].     |
| 1113 | NP_001136066.1 | 314  | 36  | 5.4 | 37.9 | 14q31      | ITPK1     | inositol-tetrakisphosphate 1-kinase isoform b [Homo sapiens].     |
| 1114 | NP_055031.2    | 414  | 46  | 5.7 | 41.1 | 14q31      | ITPK1     | inositol-tetrakisphosphate 1-kinase isoform a [Homo sapiens].     |

|      |                |      |     |      |      |            |          |                                                                                            |
|------|----------------|------|-----|------|------|------------|----------|--------------------------------------------------------------------------------------------|
| 1115 | NP_001136065.1 | 414  | 46  | 5.7  | 41.1 | 14q31      | ITPK1    | inositol-tetrakisphosphate 1-kinase isoform a [Homo sapiens].                              |
| 1116 | NP_689540.2    | 723  | 83  | 4.5  | 36.5 | 14q32.2    | AK7      | adenylate kinase 7 [Homo sapiens].                                                         |
| 1117 | NP_003375.1    | 396  | 45  | 9.2  | 25.5 | 14q32      | VRK1     | serine/threonine-protein kinase VRK1 [Homo sapiens].                                       |
| 1118 | NP_116019.1    | 212  | 24  | 5.9  | 21.2 | 14q32.31   | CINP     | cyclin-dependent kinase 2-interacting protein isoform 2 [Homo sapiens].                    |
| 1119 | NP_001171082.1 | 227  | 26  | 6.1  | 18.9 | 14q32.31   | CINP     | cyclin-dependent kinase 2-interacting protein isoform 1 [Homo sapiens].                    |
| 1120 | NP_001171083.1 | 118  | 13  | 5.8  | 23.7 | 14q32.31   | CINP     | cyclin-dependent kinase 2-interacting protein isoform 3 [Homo sapiens].                    |
| 1121 | NP_006026.3    | 1711 | 194 | 5.9  | 28.3 | 14q32.3    | CDC42BPB | serine/threonine-protein kinase MRCK beta [Homo sapiens].                                  |
| 1122 | NP_001122390.1 | 753  | 84  | 9.9  | 22.7 | 14q32.3    | MARK3    | MAP/microtubule affinity-regulating kinase 3 isoform a [Homo sapiens].                     |
| 1123 | NP_001122391.1 | 744  | 83  | 9.8  | 22.8 | 14q32.3    | MARK3    | MAP/microtubule affinity-regulating kinase 3 isoform b [Homo sapiens].                     |
| 1124 | NP_002367.4    | 729  | 81  | 9.9  | 23.3 | 14q32.3    | MARK3    | MAP/microtubule affinity-regulating kinase 3 isoform c [Homo sapiens].                     |
| 1125 | NP_001122392.1 | 713  | 80  | 9.9  | 23.3 | 14q32.3    | MARK3    | MAP/microtubule affinity-regulating kinase 3 isoform d [Homo sapiens].                     |
| 1126 | NP_001122393.1 | 659  | 74  | 10.2 | 19.3 | 14q32.3    | MARK3    | MAP/microtubule affinity-regulating kinase 3 isoform e [Homo sapiens].                     |
| 1127 | NP_001814.2    | 381  | 43  | 5.2  | 33.1 | 14q32      | CKB      | creatine kinase B-type [Homo sapiens].                                                     |
| 1128 | NP_005154.2    | 480  | 56  | 5.7  | 29.2 | 14q32.32   | AKT1     | RAC-alpha serine/threonine-protein kinase [Homo sapiens].                                  |
| 1129 | NP_001014431.1 | 480  | 56  | 5.7  | 29.2 | 14q32.32   | AKT1     | RAC-alpha serine/threonine-protein kinase [Homo sapiens].                                  |
| 1130 | NP_001014432.1 | 480  | 56  | 5.7  | 29.2 | 14q32.32   | AKT1     | RAC-alpha serine/threonine-protein kinase [Homo sapiens].                                  |
| 1131 | NP_001013725.2 | 1649 | 187 | 5.8  | 35.2 | 15q15.1    | EIF2AK4  | eukaryotic translation initiation factor 2-alpha kinase 4 [Homo sapiens].                  |
| 1132 | NP_001202.4    | 1050 | 120 | 5.0  | 29.4 | 15q15      | BUB1B    | mitotic checkpoint serine/threonine-protein kinase BUB1 beta [Homo sapiens].               |
| 1133 | NP_064553.1    | 681  | 75  | 9.9  | 32.0 | 15q14      | PAK6     | serine/threonine-protein kinase PAK 6 [Homo sapiens].                                      |
| 1134 | NP_001122100.1 | 681  | 75  | 9.9  | 32.0 | 15q14      | PAK6     | serine/threonine-protein kinase PAK 6 [Homo sapiens].                                      |
| 1135 | NP_001122101.1 | 681  | 75  | 9.9  | 32.0 | 15q14      | PAK6     | serine/threonine-protein kinase PAK 6 [Homo sapiens].                                      |
| 1136 | NP_002211.1    | 461  | 51  | 7.5  | 29.3 | 15q15.1    | ITPKA    | inositol-trisphosphate 3-kinase A [Homo sapiens].                                          |
| 1137 | NP_001129157.1 | 734  | 77  | 6.0  | 39.1 | 15q15.1-q2 | LTK      | leukocyte tyrosine kinase receptor isoform 3 precursor [Homo sapiens].                     |
| 1138 | NP_996844.1    | 803  | 85  | 6.0  | 39.9 | 15q15.1-q2 | LTK      | leukocyte tyrosine kinase receptor isoform 2 precursor [Homo sapiens].                     |
| 1139 | NP_002335.2    | 864  | 90  | 6.1  | 40.1 | 15q15.1-q2 | LTK      | leukocyte tyrosine kinase receptor isoform 1 precursor [Homo sapiens].                     |
| 1140 | NP_006284.2    | 890  | 97  | 5.4  | 43.1 | 15q15      | TYRO3    | tyrosine-protein kinase receptor TYRO3 precursor [Homo sapiens].                           |
| 1141 | NP_001122080.1 | 1514 | 164 | 6.3  | 33.2 | 15q15.1    | MAPKBP1  | mitogen-activated protein kinase-binding protein 1 isoform b [Homo sapiens].               |
| 1142 | NP_055809.2    | 1508 | 163 | 6.3  | 33.2 | 15q15.1    | MAPKBP1  | mitogen-activated protein kinase-binding protein 1 isoform a [Homo sapiens].               |
| 1143 | NP_001252540.1 | 1231 | 134 | 6.1  | 34.6 | 15q15.1    | MAPKBP1  | mitogen-activated protein kinase-binding protein 1 isoform c [Homo sapiens].               |
| 1144 | NP_775771.3    | 1244 | 137 | 6.5  | 23.0 | 15q15.2    | TTBK2    | tau-tubulin kinase 2 [Homo sapiens].                                                       |
| 1145 | NP_001177143.1 | 1406 | 156 | 5.0  | 30.4 | 15q15.3    | PPIP5K1  | inositol hexakisphosphate and diphosphoinositol-pentakisphosphate 3-kinase [Homo sapiens]. |
| 1146 | NP_001124331.1 | 1408 | 157 | 5.1  | 29.5 | 15q15.3    | PPIP5K1  | inositol hexakisphosphate and diphosphoinositol-pentakisphosphate 3-kinase [Homo sapiens]. |
| 1147 | NP_055474.3    | 1408 | 157 | 5.1  | 29.5 | 15q15.3    | PPIP5K1  | inositol hexakisphosphate and diphosphoinositol-pentakisphosphate 3-kinase [Homo sapiens]. |
| 1148 | NP_001124330.1 | 1433 | 160 | 5.1  | 29.9 | 15q15.3    | PPIP5K1  | inositol hexakisphosphate and diphosphoinositol-pentakisphosphate 3-kinase [Homo sapiens]. |
| 1149 | NP_066270.1    | 417  | 43  | 7.3  | 30.2 | 15q15      | CKMT1B   | creatine kinase U-type, mitochondrial precursor [Homo sapiens].                            |
| 1150 | NP_001015001.1 | 417  | 43  | 7.3  | 30.2 | 15q15      | CKMT1A   | creatine kinase U-type, mitochondrial precursor [Homo sapiens].                            |
| 1151 | NP_001001556.1 | 447  | 49  | 6.0  | 46.1 | 15q21.1-q2 | GALK2    | N-acetylgalactosamine kinase isoform 2 [Homo sapiens].                                     |
| 1152 | NP_002035.1    | 458  | 50  | 6.2  | 44.3 | 15q21.1-q2 | GALK2    | N-acetylgalactosamine kinase isoform 1 [Homo sapiens].                                     |
| 1153 | NP_060142.3    | 1865 | 213 | 7.7  | 38.4 | 15q21      | TRPM7    | transient receptor potential cation channel subfamily M member 7 [Homo sapiens].           |
| 1154 | NP_002739.1    | 721  | 83  | 4.8  | 28.8 | 15q21      | MAPK6    | mitogen-activated protein kinase 6 [Homo sapiens].                                         |
| 1155 | NP_055141.2    | 370  | 43  | 6.5  | 32.2 | 15q22.31   | DAPK2    | death-associated protein kinase 2 [Homo sapiens].                                          |
| 1156 | NP_071331.2    | 422  | 49  | 9.3  | 26.8 | 15q22.1-q2 | CSNK1G1  | casein kinase I isoform gamma-1 [Homo sapiens].                                            |
| 1157 | NP_002746.1    | 393  | 43  | 6.2  | 35.9 | 15q22.1-q2 | MAP2K1   | dual specificity mitogen-activated protein kinase kinase 1 [Homo sapiens].                 |
| 1158 | NP_660143.1    | 448  | 50  | 6.0  | 43.8 | 15q23      | MAP2K5   | dual specificity mitogen-activated protein kinase kinase 5 isoform a [Homo sapiens].       |
| 1159 | NP_002748.1    | 438  | 49  | 5.8  | 43.4 | 15q23      | MAP2K5   | dual specificity mitogen-activated protein kinase kinase 5 isoform b [Homo sapiens].       |
| 1160 | NP_001193733.1 | 412  | 46  | 5.8  | 40.3 | 15q23      | MAP2K5   | dual specificity mitogen-activated protein kinase kinase 5 isoform c [Homo sapiens].       |
| 1161 | NP_001193725.1 | 605  | 66  | 7.7  | 40.5 | 15q22      | PKM      | pyruvate kinase isozymes M1/M2 isoform c [Homo sapiens].                                   |
| 1162 | NP_001193728.1 | 536  | 59  | 7.5  | 43.3 | 15q22      | PKM      | pyruvate kinase isozymes M1/M2 isoform f [Homo sapiens].                                   |
| 1163 | NP_001193727.1 | 516  | 56  | 8.4  | 42.1 | 15q22      | PKM      | pyruvate kinase isozymes M1/M2 isoform e [Homo sapiens].                                   |
| 1164 | NP_001193726.1 | 457  | 50  | 7.7  | 45.5 | 15q22      | PKM      | pyruvate kinase isozymes M1/M2 isoform d [Homo sapiens].                                   |
| 1165 | NP_002645.3    | 531  | 58  | 7.7  | 44.1 | 15q22      | PKM      | pyruvate kinase isozymes M1/M2 isoform a [Homo sapiens].                                   |
| 1166 | NP_872270.1    | 531  | 58  | 7.5  | 43.7 | 15q22      | PKM      | pyruvate kinase isozymes M1/M2 isoform b [Homo sapiens].                                   |
| 1167 | NP_872271.1    | 531  | 58  | 7.5  | 43.7 | 15q22      | PKM      | pyruvate kinase isozymes M1/M2 isoform b [Homo sapiens].                                   |
| 1168 | NP_112574.3    | 496  | 54  | 5.8  | 51.6 | 15q24.1    | ADPGK    | ADP-dependent glucokinase precursor [Homo sapiens].                                        |
| 1169 | NP_001123500.1 | 638  | 74  | 10.2 | 23.0 | 15q24      | CLK3     | dual specificity protein kinase CLK3 isoform a [Homo sapiens].                             |
| 1170 | NP_003983.2    | 490  | 59  | 9.8  | 25.7 | 15q24      | CLK3     | dual specificity protein kinase CLK3 isoform b [Homo sapiens].                             |
| 1171 | NP_004374.1    | 450  | 51  | 6.6  | 36.2 | 15q24.1    | CSK      | tyrosine-protein kinase CSK [Homo sapiens].                                                |
| 1172 | NP_001120662.1 | 450  | 51  | 6.6  | 36.2 | 15q24.1    | CSK      | tyrosine-protein kinase CSK [Homo sapiens].                                                |
| 1173 | NP_001092906.1 | 472  | 53  | 7.0  | 34.3 | 15q24.1    | ULK3     | serine/threonine-protein kinase ULK3 [Homo sapiens].                                       |

|      |                |      |     |      |      |            |          |                                                                                     |
|------|----------------|------|-----|------|------|------------|----------|-------------------------------------------------------------------------------------|
| 1174 | NP_079052.2    | 1746 | 193 | 6.4  | 21.9 | 15q24.3    | PEAK1    | pseudopodium-enriched atypical kinase 1 [Homo sapiens].                             |
| 1175 | NP_006374.1    | 187  | 22  | 4.3  | 32.6 | 15q24      | CIB2     | calcium and integrin-binding family member 2 [Homo sapiens].                        |
| 1176 | NP_001077081.1 | 220  | 25  | 9.3  | 36.4 | 15q25.1    | AGPHD1   | hydroxylysine kinase isoform 2 [Homo sapiens].                                      |
| 1177 | NP_001013641.2 | 373  | 42  | 6.4  | 40.5 | 15q25.1    | AGPHD1   | hydroxylysine kinase isoform 1 [Homo sapiens].                                      |
| 1178 | NP_065829.3    | 1907 | 201 | 7.4  | 22.8 | 15q25.2    | ALPK3    | alpha-protein kinase 3 [Homo sapiens].                                              |
| 1179 | NP_009131.2    | 2813 | 308 | 5.0  | 27.3 | 15q24-q25  | AKAP13   | A-kinase anchor protein 13 isoform 2 [Homo sapiens].                                |
| 1180 | NP_006729.4    | 2817 | 308 | 4.9  | 27.4 | 15q24-q25  | AKAP13   | A-kinase anchor protein 13 isoform 1 [Homo sapiens].                                |
| 1181 | NP_001257475.1 | 1434 | 162 | 6.6  | 24.3 | 15q24-q25  | AKAP13   | A-kinase anchor protein 13 isoform 4 [Homo sapiens].                                |
| 1182 | NP_001230030.1 | 817  | 88  | 6.3  | 37.4 | 15q25      | NTRK3    | NT-3 growth factor receptor isoform d precursor [Homo sapiens].                     |
| 1183 | NP_002521.2    | 825  | 89  | 6.2  | 37.8 | 15q25      | NTRK3    | NT-3 growth factor receptor isoform b precursor [Homo sapiens].                     |
| 1184 | NP_001012338.1 | 839  | 91  | 6.1  | 38.2 | 15q25      | NTRK3    | NT-3 growth factor receptor isoform a precursor [Homo sapiens].                     |
| 1185 | NP_001007157.1 | 612  | 65  | 5.7  | 33.0 | 15q25      | NTRK3    | NT-3 growth factor receptor isoform c precursor [Homo sapiens].                     |
| 1186 | NP_006375.2    | 191  | 22  | 4.5  | 26.7 | 15q25.3-q2 | CIB1     | calcium and integrin-binding protein 1 [Homo sapiens].                              |
| 1187 | NP_001996.1    | 822  | 93  | 6.3  | 32.7 | 15q26.1    | FES      | tyrosine-protein kinase Fes/Fps isoform 1 [Homo sapiens].                           |
| 1188 | NP_001137256.1 | 752  | 85  | 6.4  | 30.9 | 15q26.1    | FES      | tyrosine-protein kinase Fes/Fps isoform 3 [Homo sapiens].                           |
| 1189 | NP_001137255.1 | 764  | 87  | 6.2  | 34.3 | 15q26.1    | FES      | tyrosine-protein kinase Fes/Fps isoform 2 [Homo sapiens].                           |
| 1190 | NP_001137257.1 | 694  | 79  | 6.3  | 32.4 | 15q26.1    | FES      | tyrosine-protein kinase Fes/Fps isoform 4 [Homo sapiens].                           |
| 1191 | NP_078928.3    | 2015 | 225 | 6.2  | 41.4 | 15q26.3    | LRRK1    | leucine-rich repeat serine/threonine-protein kinase 1 [Homo sapiens].               |
| 1192 | NP_005000.1    | 187  | 17  | 9.6  | 37.7 | 16p13.3    | NME4     | nucleoside diphosphate kinase, mitochondrial precursor [Homo sapiens].              |
| 1193 | NP_055948.2    | 1336 | 147 | 5.1  | 27.7 | 16p13.3    | MAPK8IP3 | C-Jun-amino-terminal kinase-interacting protein 3 isoform 1 [Homo sapiens].         |
| 1194 | NP_001035529.1 | 1330 | 147 | 5.2  | 27.7 | 16p13.3    | MAPK8IP3 | C-Jun-amino-terminal kinase-interacting protein 3 isoform 2 [Homo sapiens].         |
| 1195 | NP_002504.2    | 169  | 19  | 7.8  | 45.0 | 16q13.3    | NME3     | nucleoside diphosphate kinase 3 precursor [Homo sapiens].                           |
| 1196 | NP_001123484.1 | 337  | 37  | 7.9  | 12.2 | 16p13.3    | SLC9A3R2 | Na(+)/H(+) exchange regulatory cofactor NHE-RF2 isoform a [Homo sapiens].           |
| 1197 | NP_004776.3    | 326  | 36  | 8.2  | 12.6 | 16p13.3    | SLC9A3R2 | Na(+)/H(+) exchange regulatory cofactor NHE-RF2 isoform b [Homo sapiens].           |
| 1198 | NP_001239002.1 | 226  | 25  | 9.8  | 9.3  | 16p13.3    | SLC9A3R2 | Na(+)/H(+) exchange regulatory cofactor NHE-RF2 isoform c [Homo sapiens].           |
| 1199 | NP_001239005.1 | 215  | 23  | 10.0 | 9.8  | 16p13.3    | SLC9A3R2 | Na(+)/H(+) exchange regulatory cofactor NHE-RF2 isoform e [Homo sapiens].           |
| 1200 | NP_001239004.1 | 224  | 24  | 9.8  | 8.9  | 16p13.3    | SLC9A3R2 | Na(+)/H(+) exchange regulatory cofactor NHE-RF2 isoform d [Homo sapiens].           |
| 1201 | NP_002604.1    | 556  | 63  | 7.0  | 25.7 | 16p13.3    | PDPK1    | 3-phosphoinositide-dependent protein kinase 1 isoform 1 [Homo sapiens].             |
| 1202 | NP_112558.2    | 429  | 48  | 6.6  | 25.6 | 16p13.3    | PDPK1    | 3-phosphoinositide-dependent protein kinase 1 isoform 2 [Homo sapiens].             |
| 1203 | NP_001248745.1 | 454  | 51  | 5.7  | 28.6 | 16p13.3    | PDPK1    | 3-phosphoinositide-dependent protein kinase 1 isoform 3 [Homo sapiens].             |
| 1204 | NP_001245379.1 | 430  | 47  | 5.7  | 37.0 | 16p13.3    | PKMYT1   | membrane-associated tyrosine- and threonine-specific protein kinase [Homo sapiens]. |
| 1205 | NP_004194.3    | 499  | 55  | 6.5  | 35.9 | 16p13.3    | PKMYT1   | membrane-associated tyrosine- and threonine-specific protein kinase [Homo sapiens]. |
| 1206 | NP_001245380.1 | 490  | 54  | 6.5  | 35.1 | 16p13.3    | PKMYT1   | membrane-associated tyrosine- and threonine-specific protein kinase [Homo sapiens]. |
| 1207 | NP_872629.1    | 480  | 52  | 7.5  | 36.7 | 16p13.3    | PKMYT1   | membrane-associated tyrosine- and threonine-specific protein kinase [Homo sapiens]. |
| 1208 | NP_055907.3    | 3661 | 411 | 6.0  | 41.3 | 16p12.3    | SMG1     | serine/threonine-protein kinase SMG1 [Homo sapiens].                                |
| 1209 | NP_569731.2    | 1133 | 126 | 10.4 | 19.5 | 16p12.2    | NPIPL3   | putative NPIP-like protein KIAA0220-like [Homo sapiens].                            |
| 1210 | NP_037434.1    | 725  | 82  | 5.1  | 20.3 | 16p12.2    | EEF2K    | eukaryotic elongation factor 2 kinase [Homo sapiens].                               |
| 1211 | NP_005021.2    | 603  | 68  | 9.1  | 35.5 | 16p12.2    | PLK1     | serine/threonine-protein kinase PLK1 [Homo sapiens].                                |
| 1212 | NP_997700.1    | 671  | 77  | 6.6  | 27.4 | 16p11.2    | PRKCB    | protein kinase C beta type isoform 1 [Homo sapiens].                                |
| 1213 | NP_002729.2    | 673  | 77  | 6.6  | 27.3 | 16p11.2    | PRKCB    | protein kinase C beta type isoform 2 [Homo sapiens].                                |
| 1214 | NP_001019572.1 | 424  | 46  | 9.3  | 38.0 | 16p11.2    | SBK1     | serine/threonine-protein kinase SBK1 [Homo sapiens].                                |
| 1215 | NP_004774.1    | 1049 | 119 | 7.1  | 21.2 | 16p11.2    | TAOK2    | serine/threonine-protein kinase TAO2 isoform 2 [Homo sapiens].                      |
| 1216 | NP_057235.2    | 1235 | 138 | 6.8  | 29.2 | 16p11.2    | TAOK2    | serine/threonine-protein kinase TAO2 isoform 1 [Homo sapiens].                      |
| 1217 | NP_001238972.1 | 1122 | 126 | 8.1  | 30.4 | 16p11.2    | TAOK2    | serine/threonine-protein kinase TAO2 isoform 3 [Homo sapiens].                      |
| 1218 | NP_001103361.1 | 335  | 38  | 5.8  | 36.4 | 16p11.2    | MAPK3    | mitogen-activated protein kinase 3 isoform 3 [Homo sapiens].                        |
| 1219 | NP_002737.2    | 379  | 43  | 6.3  | 34.3 | 16p11.2    | MAPK3    | mitogen-activated protein kinase 3 isoform 1 [Homo sapiens].                        |
| 1220 | NP_001035145.1 | 357  | 40  | 7.3  | 35.9 | 16p11.2    | MAPK3    | mitogen-activated protein kinase 3 isoform 2 [Homo sapiens].                        |
| 1221 | NP_036380.2    | 448  | 47  | 5.6  | 54.7 | 16p11.2    | SEPHS2   | selenide, water dikinase 2 [Homo sapiens].                                          |
| 1222 | NP_001165903.1 | 374  | 43  | 6.8  | 33.4 | 16p11.2    | PHKG2    | phosphorylase b kinase gamma catalytic chain, testis/liver isoform [Homo sapiens].  |
| 1223 | NP_000285.1    | 406  | 46  | 5.9  | 32.3 | 16p11.2    | PHKG2    | phosphorylase b kinase gamma catalytic chain, testis/liver isoform [Homo sapiens].  |
| 1224 | NP_872299.2    | 819  | 88  | 5.7  | 28.6 | 16q11.2    | MYLK3    | myosin light chain kinase 3 [Homo sapiens].                                         |
| 1225 | NP_000284.1    | 1093 | 125 | 6.5  | 38.0 | 16q12-q13  | PHKB     | phosphorylase b kinase regulatory subunit beta isoform a [Homo sapiens].            |
| 1226 | NP_001027005.1 | 1086 | 124 | 6.2  | 39.0 | 16q12-q13  | PHKB     | phosphorylase b kinase regulatory subunit beta isoform b [Homo sapiens].            |
| 1227 | NP_060580.2    | 326  | 37  | 8.0  | 22.7 | 16q21      | DOK4     | docking protein 4 [Homo sapiens].                                                   |
| 1228 | NP_001887.1    | 350  | 41  | 8.8  | 25.4 | 16q21      | CSNK2A2  | casein kinase II subunit alpha' [Homo sapiens].                                     |
| 1229 | NP_001166114.1 | 234  | 28  | 6.4  | 33.8 | 16q22-q23  | TK2      | thymidine kinase 2, mitochondrial isoform 2 precursor [Homo sapiens].               |
| 1230 | NP_001166115.1 | 240  | 25  | 8.0  | 30.9 | 16q22-q23  | TK2      | thymidine kinase 2, mitochondrial isoform 3 precursor [Homo sapiens].               |
| 1231 | NP_001166116.1 | 247  | 25  | 6.2  | 33.6 | 16q22-q23  | TK2      | thymidine kinase 2, mitochondrial isoform 4 precursor [Homo sapiens].               |
| 1232 | NP_004605.4    | 265  | 27  | 6.6  | 34.1 | 16q22-q23  | TK2      | thymidine kinase 2, mitochondrial isoform 1 precursor [Homo sapiens].               |

|      |                |      |     |      |      |           |         |                                                                     |
|------|----------------|------|-----|------|------|-----------|---------|---------------------------------------------------------------------|
| 1233 | NP_006733.1    | 424  | 48  | 10.1 | 30.9 | 16q22.1   | PSKH1   | serine/threonine-protein kinase H1 [Homo sapiens].                  |
| 1234 | NP_001135969.1 | 263  | 30  | 9.5  | 17.1 | 16q23.1   | MLKL    | mixed lineage kinase domain-like protein isoform 2 [Homo sapiens].  |
| 1235 | NP_689862.1    | 471  | 54  | 9.0  | 27.2 | 16q23.1   | MLKL    | mixed lineage kinase domain-like protein isoform 1 [Homo sapiens].  |
| 1236 | NP_443714.3    | 360  | 41  | 9.0  | 41.9 | 16q24     | CDK10   | cyclin-dependent kinase 10 isoform a [Homo sapiens].                |
| 1237 | NP_443713.2    | 272  | 31  | 8.3  | 52.9 | 16q24     | CDK10   | cyclin-dependent kinase 10 isoform b [Homo sapiens].                |
| 1238 | NP_001153839.1 | 289  | 33  | 8.9  | 48.8 | 16q24     | CDK10   | cyclin-dependent kinase 10 isoform d [Homo sapiens].                |
| 1239 | NP_001092003.2 | 283  | 32  | 8.6  | 51.6 | 16q24     | CDK10   | cyclin-dependent kinase 10 isoform c [Homo sapiens].                |
| 1240 | NP_006752.1    | 255  | 29  | 4.5  | 33.3 | 17p13.3   | YWHAE   | 14-3-3 protein epsilon [Homo sapiens].                              |
| 1241 | NP_114171.2    | 798  | 88  | 9.4  | 31.1 | 17p13     | GSG2    | serine/threonine-protein kinase haspin [Homo sapiens].              |
| 1242 | NP_115670.1    | 505  | 56  | 5.5  | 32.9 | 17p13.2   | CAMKK1  | calcium/calmodulin-dependent protein kinase kinase 1 isoform a      |
| 1243 | NP_757343.1    | 505  | 56  | 5.5  | 32.9 | 17p13.2   | CAMKK1  | calcium/calmodulin-dependent protein kinase kinase 1 isoform a      |
| 1244 | NP_757344.2    | 520  | 58  | 5.8  | 31.7 | 17p13.2   | CAMKK1  | calcium/calmodulin-dependent protein kinase kinase 1 isoform b      |
| 1245 | NP_722549.2    | 1332 | 150 | 7.7  | 22.8 | 17p13.2   | MINK1   | misshapen-like kinase 1 isoform 3 [Homo sapiens].                   |
| 1246 | NP_733763.1    | 1303 | 147 | 7.1  | 23.2 | 17p13.2   | MINK1   | misshapen-like kinase 1 isoform 2 [Homo sapiens].                   |
| 1247 | NP_056531.1    | 1295 | 146 | 7.0  | 23.5 | 17p13.2   | MINK1   | misshapen-like kinase 1 isoform 1 [Homo sapiens].                   |
| 1248 | NP_001020108.1 | 1312 | 148 | 7.2  | 22.8 | 17p13.2   | MINK1   | misshapen-like kinase 1 isoform 4 [Homo sapiens].                   |
| 1249 | NP_001238831.1 | 666  | 72  | 9.8  | 40.4 | 17p13.1   | TNK1    | non-receptor tyrosine-protein kinase TNK1 isoform 1 [Homo sapiens]. |
| 1250 | NP_003976.2    | 661  | 72  | 9.8  | 40.4 | 17p13.1   | TNK1    | non-receptor tyrosine-protein kinase TNK1 isoform 2 [Homo sapiens]. |
| 1251 | NP_001397.1    | 340  | 33  | 8.5  | 30.0 | 17p13.1   | EFNB3   | ephrin-B3 precursor [Homo sapiens].                                 |
| 1252 | NP_004208.2    | 344  | 39  | 9.6  | 30.2 | 17p13.1   | AURKB   | aurora kinase B isoform 1 [Homo sapiens].                           |
| 1253 | NP_001243763.1 | 303  | 35  | 9.3  | 30.0 | 17p13.1   | AURKB   | aurora kinase B isoform 2 [Homo sapiens].                           |
| 1254 | NP_001010855.1 | 754  | 84  | 7.4  | 41.8 | 17p13.1   | PIK3R6  | phosphoinositide 3-kinase regulatory subunit 6 [Homo sapiens].      |
| 1255 | NP_055123.2    | 880  | 97  | 6.3  | 38.1 | 17p13.1   | PIK3R5  | phosphoinositide 3-kinase regulatory subunit 5 isoform 1 [Homo      |
| 1256 | NP_001136105.1 | 880  | 97  | 6.3  | 38.1 | 17p13.1   | PIK3R5  | phosphoinositide 3-kinase regulatory subunit 5 isoform 1 [Homo      |
| 1257 | NP_001238781.1 | 494  | 55  | 9.5  | 32.8 | 17p13.1   | PIK3R5  | phosphoinositide 3-kinase regulatory subunit 5 isoform 2 [Homo      |
| 1258 | NP_001238780.1 | 494  | 55  | 9.5  | 32.8 | 17p13.1   | PIK3R5  | phosphoinositide 3-kinase regulatory subunit 5 isoform 2 [Homo      |
| 1259 | NP_001238782.1 | 494  | 55  | 9.5  | 32.8 | 17p13.1   | PIK3R5  | phosphoinositide 3-kinase regulatory subunit 5 isoform 2 [Homo      |
| 1260 | NP_001238784.1 | 494  | 55  | 9.5  | 32.8 | 17p13.1   | PIK3R5  | phosphoinositide 3-kinase regulatory subunit 5 isoform 2 [Homo      |
| 1261 | NP_003001.1    | 399  | 44  | 8.0  | 28.8 | 17p12     | MAP2K4  | dual specificity mitogen-activated protein kinase kinase 4 [Homo    |
| 1262 | NP_620602.2    | 816  | 88  | 5.5  | 30.6 | 17p11.2   | MAPK7   | mitogen-activated protein kinase 7 isoform 1 [Homo sapiens].        |
| 1263 | NP_620603.2    | 816  | 88  | 5.5  | 30.6 | 17p11.2   | MAPK7   | mitogen-activated protein kinase 7 isoform 1 [Homo sapiens].        |
| 1264 | NP_002740.2    | 816  | 88  | 5.5  | 30.6 | 17p11.2   | MAPK7   | mitogen-activated protein kinase 7 isoform 1 [Homo sapiens].        |
| 1265 | NP_620601.1    | 677  | 73  | 5.4  | 28.8 | 17p11.2   | MAPK7   | mitogen-activated protein kinase 7 isoform 2 [Homo sapiens].        |
| 1266 | NP_055498.3    | 1036 | 113 | 8.4  | 34.7 | 17p11.2   | ULK2    | serine/threonine-protein kinase ULK2 [Homo sapiens].                |
| 1267 | NP_001136082.1 | 1036 | 113 | 8.4  | 34.7 | 17p11.2   | ULK2    | serine/threonine-protein kinase ULK2 [Homo sapiens].                |
| 1268 | NP_009133.2    | 662  | 71  | 5.6  | 30.6 | 17p11.1   | AKAP10  | A-kinase anchor protein 10, mitochondrial precursor [Homo sapiens]. |
| 1269 | NP_659731.1    | 347  | 39  | 7.2  | 35.4 | 17q11.2   | MAP2K3  | dual specificity mitogen-activated protein kinase kinase 3 isoform  |
| 1270 | NP_002747.2    | 318  | 36  | 5.8  | 38.1 | 17q11.2   | MAP2K3  | dual specificity mitogen-activated protein kinase kinase 3 isoform  |
| 1271 | NP_055053.1    | 762  | 85  | 8.6  | 27.4 | 17q11.2   | KSR1    | kinase suppressor of Ras 1 [Homo sapiens].                          |
| 1272 | NP_057315.3    | 527  | 58  | 8.0  | 41.6 | 17q11.2   | NLK     | serine/threonine-protein kinase NLK [Homo sapiens].                 |
| 1273 | NP_001167574.1 | 410  | 46  | 6.9  | 41.2 | 17q11.2   | SGK494  | uncharacterized serine/threonine-protein kinase SGK494 [Homo        |
| 1274 | NP_835464.1    | 692  | 75  | 7.6  | 49.3 | 17q11.1   | NEK8    | serine/threonine-protein kinase Nek8 [Homo sapiens].                |
| 1275 | NP_065842.1    | 1001 | 116 | 7.3  | 17.0 | 17q11.2   | TAOK1   | serine/threonine-protein kinase TAO1 isoform 1 [Homo sapiens].      |
| 1276 | NP_079418.1    | 853  | 98  | 6.5  | 19.2 | 17q11.2   | TAOK1   | serine/threonine-protein kinase TAO1 isoform 2 [Homo sapiens].      |
| 1277 | NP_054749.2    | 761  | 84  | 6.3  | 26.8 | 17p11.2   | GIT1    | ARF GTPase-activating protein GIT1 isoform 2 [Homo sapiens].        |
| 1278 | NP_001078923.1 | 770  | 85  | 6.6  | 26.2 | 17p11.2   | GIT1    | ARF GTPase-activating protein GIT1 isoform 1 [Homo sapiens].        |
| 1279 | NP_003876.1    | 307  | 34  | 9.7  | 37.5 | 17q11.2   | CDK5R1  | cyclin-dependent kinase 5 activator 1 [Homo sapiens].               |
| 1280 | NP_008957.1    | 198  | 22  | 9.8  | 49.5 | 17q12     | DUSP14  | dual specificity protein phosphatase 14 [Homo sapiens].             |
| 1281 | NP_079524.2    | 1183 | 127 | 9.7  | 19.9 | 17q12     | SRCIN1  | SRC kinase signaling inhibitor 1 [Homo sapiens].                    |
| 1282 | NP_003550.1    | 416  | 47  | 7.0  | 28.8 | 17q12     | PIP4K2B | phosphatidylinositol 5-phosphate 4-kinase type-2 beta [Homo         |
| 1283 | NP_057591.2    | 1490 | 164 | 9.8  | 20.6 | 17q12     | CDK12   | cyclin-dependent kinase 12 isoform 1 [Homo sapiens].                |
| 1284 | NP_055898.1    | 1481 | 163 | 9.8  | 20.5 | 17q12     | CDK12   | cyclin-dependent kinase 12 isoform 2 [Homo sapiens].                |
| 1285 | NP_004439.2    | 1255 | 138 | 5.5  | 36.7 | 17q12     | ERBB2   | receptor tyrosine-protein kinase erbB-2 isoform a precursor [Homo   |
| 1286 | NP_001005862.1 | 1225 | 135 | 5.6  | 35.9 | 17q12     | ERBB2   | receptor tyrosine-protein kinase erbB-2 isoform b [Homo sapiens].   |
| 1287 | NP_115763.2    | 1243 | 135 | 5.2  | 24.7 | 17q21-q22 | WNK4    | serine/threonine-protein kinase WNK4 [Homo sapiens].                |
| 1288 | NP_079095.3    | 231  | 27  | 9.9  | 46.8 | 17q21.31  | DCAKD   | dephospho-CoA kinase domain-containing protein [Homo sapiens].      |
| 1289 | NP_001122103.1 | 231  | 27  | 9.9  | 46.8 | 17q21.31  | DCAKD   | dephospho-CoA kinase domain-containing protein [Homo sapiens].      |
| 1290 | NP_003945.2    | 947  | 104 | 7.5  | 30.4 | 17q21     | MAP3K14 | mitogen-activated protein kinase kinase kinase 14 [Homo sapiens].   |
| 1291 | NP_055541.1    | 615  | 68  | 5.5  | 18.5 | 17q21.32  | TBKBP1  | TANK-binding kinase 1-binding protein 1 [Homo sapiens].             |

|      |                |      |     |      |      |            |          |                                                                     |
|------|----------------|------|-----|------|------|------------|----------|---------------------------------------------------------------------|
| 1292 | NP_002602.2    | 407  | 46  | 6.1  | 38.6 | 17q21.33   | PDK2     | pyruvate dehydrogenase kinase, isozyme 2 isoform 1 [Homo sapiens].  |
| 1293 | NP_001186829.1 | 199  | 22  | 8.7  | 37.2 | 17q21.33   | PDK2     | pyruvate dehydrogenase kinase, isozyme 2 isoform 3 [Homo sapiens].  |
| 1294 | NP_001186827.1 | 343  | 39  | 5.5  | 37.9 | 17q21.33   | PDK2     | pyruvate dehydrogenase kinase, isozyme 2 isoform 2 [Homo sapiens].  |
| 1295 | NP_001186828.1 | 343  | 39  | 5.5  | 37.9 | 17q21.33   | PDK2     | pyruvate dehydrogenase kinase, isozyme 2 isoform 2 [Homo sapiens].  |
| 1296 | NP_003962.3    | 1307 | 145 | 4.9  | 27.1 | 17q21.33   | SPAG9    | C-Jun-amino-terminal kinase-interacting protein 4 isoform 3 [Homo   |
| 1297 | NP_001123999.1 | 1311 | 145 | 4.9  | 26.9 | 17q21.33   | SPAG9    | C-Jun-amino-terminal kinase-interacting protein 4 isoform 2 [Homo   |
| 1298 | NP_001124000.1 | 1321 | 146 | 4.9  | 26.8 | 17q21.33   | SPAG9    | C-Jun-amino-terminal kinase-interacting protein 4 isoform 1 [Homo   |
| 1299 | NP_001238900.1 | 1177 | 129 | 5.2  | 32.3 | 17q21.33   | SPAG9    | C-Jun-amino-terminal kinase-interacting protein 4 isoform 4 [Homo   |
| 1300 | NP_937818.1    | 177  | 20  | 5.3  | 39.5 | 17q21.3    | NME1     | nucleoside diphosphate kinase A isoform a [Homo sapiens].           |
| 1301 | NP_000260.1    | 152  | 17  | 5.8  | 38.8 | 17q21.3    | NME1     | nucleoside diphosphate kinase A isoform b [Homo sapiens].           |
| 1302 | NP_001018147.1 | 152  | 17  | 8.7  | 35.5 | 17q21.3    | NME2     | nucleoside diphosphate kinase B isoform a [Homo sapiens].           |
| 1303 | NP_002503.1    | 152  | 17  | 8.7  | 35.5 | 17q21.3    | NME2     | nucleoside diphosphate kinase B isoform a [Homo sapiens].           |
| 1304 | NP_001018149.1 | 152  | 17  | 8.7  | 35.5 | 17q21.3    | NME2     | nucleoside diphosphate kinase B isoform a [Homo sapiens].           |
| 1305 | NP_001018148.1 | 152  | 17  | 8.7  | 35.5 | 17q21.3    | NME2     | nucleoside diphosphate kinase B isoform a [Homo sapiens].           |
| 1306 | NP_001185611.1 | 82   | 10  | 10.1 | 37.8 | 17q21.3    | NME2     | nucleoside diphosphate kinase B isoform b [Homo sapiens].           |
| 1307 | NP_003638.1    | 567  | 64  | 7.6  | 43.4 | 17q22      | DGKE     | diacylglycerol kinase epsilon [Homo sapiens].                       |
| 1308 | NP_003479.1    | 903  | 94  | 4.6  | 36.3 | 17q22      | AKAP1    | A-kinase anchor protein 1, mitochondrial precursor [Homo sapiens].  |
| 1309 | NP_001229831.1 | 903  | 97  | 4.7  | 37.3 | 17q22      | AKAP1    | A-kinase anchor protein 1, mitochondrial precursor [Homo sapiens].  |
| 1310 | NP_001229832.1 | 903  | 97  | 4.7  | 37.3 | 17q22      | AKAP1    | A-kinase anchor protein 1, mitochondrial precursor [Homo sapiens].  |
| 1311 | NP_112562.3    | 1451 | 163 | 5.0  | 27.4 | 17q22      | TEX14    | inactive serine/threonine-protein kinase TEX14 isoform b [Homo      |
| 1312 | NP_938207.2    | 1491 | 167 | 4.9  | 26.8 | 17q22      | TEX14    | inactive serine/threonine-protein kinase TEX14 isoform a [Homo      |
| 1313 | NP_001188386.1 | 1497 | 168 | 4.9  | 26.9 | 17q22      | TEX14    | inactive serine/threonine-protein kinase TEX14 isoform c [Homo      |
| 1314 | NP_055721.3    | 755  | 84  | 4.8  | 29.3 | 17q22      | PPM1E    | protein phosphatase 1E [Homo sapiens].                              |
| 1315 | NP_003152.1    | 525  | 59  | 6.2  | 26.9 | 17q23.1    | RPS6KB1  | ribosomal protein S6 kinase beta-1 [Homo sapiens].                  |
| 1316 | NP_006843.2    | 750  | 85  | 8.4  | 21.5 | 17q23      | TLK2     | serine/threonine-protein kinase tousled-like 2 isoform A [Homo      |
| 1317 | NP_001106178.1 | 718  | 82  | 8.2  | 21.7 | 17q23      | TLK2     | serine/threonine-protein kinase tousled-like 2 isoform B [Homo      |
| 1318 | NP_976226.1    | 657  | 74  | 9.3  | 21.0 | 17q23.3    | MAP3K3   | mitogen-activated protein kinase kinase kinase 3 isoform 1 [Homo    |
| 1319 | NP_002392.2    | 626  | 71  | 9.0  | 20.1 | 17q23.3    | MAP3K3   | mitogen-activated protein kinase kinase kinase 3 isoform 2 [Homo    |
| 1320 | NP_001003786.1 | 394  | 44  | 5.8  | 40.9 | 17q23.3    | STRADA   | STE20-related kinase adapter protein alpha isoform 2 [Homo          |
| 1321 | NP_001003787.1 | 431  | 48  | 6.0  | 39.4 | 17q23.3    | STRADA   | STE20-related kinase adapter protein alpha isoform 1 [Homo          |
| 1322 | NP_001003788.1 | 373  | 42  | 6.0  | 41.0 | 17q23.3    | STRADA   | STE20-related kinase adapter protein alpha isoform 4 [Homo          |
| 1323 | NP_001159441.1 | 314  | 35  | 6.2  | 44.9 | 17q23.3    | STRADA   | STE20-related kinase adapter protein alpha isoform 5 [Homo          |
| 1324 | NP_001159442.1 | 299  | 33  | 6.9  | 43.8 | 17q23.3    | STRADA   | STE20-related kinase adapter protein alpha isoform 6 [Homo          |
| 1325 | NP_699166.2    | 348  | 39  | 6.3  | 40.8 | 17q23.3    | STRADA   | STE20-related kinase adapter protein alpha isoform 3 [Homo          |
| 1326 | NP_002728.1    | 672  | 77  | 6.6  | 28.3 | 17q22-q23  | PRKCA    | protein kinase C alpha type [Homo sapiens].                         |
| 1327 | NP_002725.1    | 381  | 43  | 5.1  | 28.1 | 17q23-q24  | PRKAR1A  | cAMP-dependent protein kinase type I-alpha regulatory subunit [Homo |
| 1328 | NP_997636.1    | 381  | 43  | 5.1  | 28.1 | 17q23-q24  | PRKAR1A  | cAMP-dependent protein kinase type I-alpha regulatory subunit [Homo |
| 1329 | NP_997637.1    | 381  | 43  | 5.1  | 28.1 | 17q23-q24  | PRKAR1A  | cAMP-dependent protein kinase type I-alpha regulatory subunit [Homo |
| 1330 | NP_002749.2    | 334  | 37  | 7.2  | 38.9 | 17q24.3    | MAP2K6   | dual specificity mitogen-activated protein kinase kinase 6 [Homo    |
| 1331 | NP_001249.1    | 305  | 35  | 9.1  | 41.3 | 17q25.1    | CDK3     | cyclin-dependent kinase 3 [Homo sapiens].                           |
| 1332 | NP_892010.2    | 470  | 51  | 6.7  | 53.0 | 17q25.2    | SPHK1    | sphingosine kinase 1 isoform 2 [Homo sapiens].                      |
| 1333 | NP_068807.2    | 398  | 44  | 6.9  | 59.3 | 17q25.2    | SPHK1    | sphingosine kinase 1 isoform 1 [Homo sapiens].                      |
| 1334 | NP_001136073.1 | 384  | 43  | 6.7  | 57.3 | 17q25.2    | SPHK1    | sphingosine kinase 1 isoform 3 [Homo sapiens].                      |
| 1335 | NP_001136074.1 | 384  | 43  | 6.7  | 57.3 | 17q25.2    | SPHK1    | sphingosine kinase 1 isoform 3 [Homo sapiens].                      |
| 1336 | NP_003249.3    | 234  | 25  | 8.5  | 46.2 | 17q23.2-q2 | TK1      | thymidine kinase, cytosolic [Homo sapiens].                         |
| 1337 | NP_001073864.2 | 1374 | 145 | 4.3  | 32.4 | 17q25.3    | AATK     | serine/threonine-protein kinase LMTK1 isoform 1 [Homo sapiens].     |
| 1338 | NP_004911.2    | 1271 | 134 | 4.4  | 30.8 | 17q25.3    | AATK     | serine/threonine-protein kinase LMTK1 isoform 2 [Homo sapiens].     |
| 1339 | NP_004703.1    | 777  | 86  | 5.8  | 20.6 | 17q25      | HGS      | hepatocyte growth factor-regulated tyrosine kinase substrate [Homo  |
| 1340 | NP_001884.2    | 415  | 47  | 10.1 | 27.2 | 17q25      | CSNK1D   | casein kinase I isoform delta isoform 1 [Homo sapiens].             |
| 1341 | NP_620693.1    | 409  | 47  | 10.0 | 26.4 | 17q25      | CSNK1D   | casein kinase I isoform delta isoform 2 [Homo sapiens].             |
| 1342 | NP_005424.1    | 543  | 61  | 6.3  | 32.0 | 18p11.31-p | YES1     | tyrosine-protein kinase Yes [Homo sapiens].                         |
| 1343 | NP_005397.1    | 1354 | 158 | 5.6  | 18.6 | 18q11.1    | ROCK1    | rho-associated protein kinase 1 [Homo sapiens].                     |
| 1344 | NP_003822.2    | 519  | 59  | 5.4  | 26.6 | 18q11.2    | RIOK3    | serine/threonine-protein kinase RIO3 [Homo sapiens].                |
| 1345 | NP_060640.2    | 312  | 36  | 7.3  | 25.6 | 18q12.2    | RPRD1A   | regulation of nuclear pre-mRNA domain-containing protein 1A [Homo   |
| 1346 | NP_002638.2    | 887  | 102 | 6.4  | 32.8 | 18q12.3    | PIK3C3   | phosphatidylinositol 3-kinase catalytic subunit type 3 [Homo        |
| 1347 | NP_002738.2    | 587  | 66  | 5.1  | 33.0 | 18q21.1    | MAPK4    | mitogen-activated protein kinase 4 [Homo sapiens].                  |
| 1348 | NP_443179.3    | 2170 | 237 | 5.0  | 23.6 | 18q21.31   | ALPK2    | alpha-protein kinase 2 [Homo sapiens].                              |
| 1349 | NP_002566.1    | 415  | 47  | 5.4  | 36.9 | 18q21.3    | SERPINB2 | plasminogen activator inhibitor 2 [Homo sapiens].                   |
| 1350 | NP_001137290.1 | 415  | 47  | 5.4  | 36.9 | 18q21.3    | SERPINB2 | plasminogen activator inhibitor 2 [Homo sapiens].                   |



|      |                |      |     |      |      |            |           |                                                                    |
|------|----------------|------|-----|------|------|------------|-----------|--------------------------------------------------------------------|
| 1351 | NP_689934.2    | 331  | 38  | 8.5  | 22.1 | 18q22.2    | DOK6      | docking protein 6 [Homo sapiens].                                  |
| 1352 | NP_000446.1    | 433  | 49  | 7.2  | 31.4 | 19p13.3    | STK11     | serine/threonine-protein kinase STK11 [Homo sapiens].              |
| 1353 | NP_001396.2    | 213  | 19  | 6.3  | 15.9 | 19p13.3    | EFNA2     | ephrin-A2 precursor [Homo sapiens].                                |
| 1354 | NP_001230008.1 | 336  | 36  | 6.0  | 33.6 | 19p13.3    | PLK5      | inactive serine/threonine-protein kinase PLK5 [Homo sapiens].      |
| 1355 | NP_001310.3    | 415  | 47  | 9.3  | 25.1 | 19p13.3    | CSNK1G2   | casein kinase I isoform gamma-2 [Homo sapiens].                    |
| 1356 | NP_060042.2    | 414  | 47  | 6.0  | 31.4 | 19p13.3    | MKNK2     | MAP kinase-interacting serine/threonine-protein kinase 2 isoform 1 |
| 1357 | NP_951009.1    | 465  | 52  | 5.8  | 31.8 | 19p13.3    | MKNK2     | MAP kinase-interacting serine/threonine-protein kinase 2 isoform 2 |
| 1358 | NP_570719.1    | 217  | 25  | 8.8  | 31.3 | 19p13.3    | MOB3A     | MOB kinase activator 3A [Homo sapiens].                            |
| 1359 | NP_001182662.1 | 640  | 70  | 5.2  | 34.2 | 19p13.3    | PIP5K1C   | phosphatidylinositol 4-phosphate 5-kinase type-1 gamma isoform 1   |
| 1360 | NP_036530.1    | 668  | 73  | 5.0  | 33.1 | 19p13.3    | PIP5K1C   | phosphatidylinositol 4-phosphate 5-kinase type-1 gamma isoform 2   |
| 1361 | NP_002369.2    | 508  | 57  | 9.5  | 35.0 | 19p13.3    | MATK      | megakaryocyte-associated tyrosine-protein kinase isoform b [Homo   |
| 1362 | NP_647612.1    | 507  | 56  | 8.9  | 35.7 | 19p13.3    | MATK      | megakaryocyte-associated tyrosine-protein kinase isoform a [Homo   |
| 1363 | NP_647611.1    | 466  | 52  | 8.6  | 37.1 | 19p13.3    | MATK      | megakaryocyte-associated tyrosine-protein kinase isoform c [Homo   |
| 1364 | NP_733778.1    | 230  | 26  | 5.7  | 28.3 | 19p13.3    | NMRK2     | nicotinamide riboside kinase 2 [Homo sapiens].                     |
| 1365 | NP_001339.1    | 454  | 53  | 6.5  | 26.7 | 19p13.3    | DAPK3     | death-associated protein kinase 3 [Homo sapiens].                  |
| 1366 | NP_109587.1    | 400  | 44  | 6.1  | 34.0 | 19p13.3    | MAP2K2    | dual specificity mitogen-activated protein kinase kinase 2 [Homo   |
| 1367 | NP_001013863.1 | 403  | 45  | 8.2  | 29.8 | 19p13.3    | STAP2     | signal-transducing adaptor protein 2 isoform 2 [Homo sapiens].     |
| 1368 | NP_060190.2    | 449  | 50  | 7.7  | 30.1 | 19p13.3    | STAP2     | signal-transducing adaptor protein 2 isoform 1 [Homo sapiens].     |
| 1369 | XP_003403529.3 | 118  | 13  | 8.1  | 32.2 | 19p13.3    | LOC390877 | PREDICTED: adenylate kinase isoenzyme 1-like [Homo sapiens].       |
| 1370 | NP_660186.1    | 419  | 47  | 9.5  | 30.5 | 19p13.3-p1 | MAP2K7    | dual specificity mitogen-activated protein kinase kinase 7 [Homo   |
| 1371 | NP_003322.3    | 1187 | 134 | 6.7  | 36.1 | 19p13.2    | TYK2      | non-receptor tyrosine-protein kinase TYK2 [Homo sapiens].          |
| 1372 | NP_524145.1    | 166  | 18  | 5.7  | 40.4 | 19p13      | CDKN2D    | cyclin-dependent kinase 4 inhibitor D [Homo sapiens].              |
| 1373 | NP_001791.1    | 166  | 18  | 5.7  | 40.4 | 19p13      | CDKN2D    | cyclin-dependent kinase 4 inhibitor D [Homo sapiens].              |
| 1374 | NP_001001329.1 | 525  | 59  | 4.2  | 14.1 | 19p13.2    | PRKCSH    | glucosidase 2 subunit beta isoform 2 precursor [Homo sapiens].     |
| 1375 | NP_002734.2    | 528  | 59  | 4.2  | 14.0 | 19p13.2    | PRKCSH    | glucosidase 2 subunit beta isoform 1 precursor [Homo sapiens].     |
| 1376 | NP_115708.1    | 315  | 34  | 5.3  | 33.0 | 19p13.2    | WDR83     | WD repeat domain-containing protein 83 [Homo sapiens].             |
| 1377 | NP_001093207.1 | 315  | 34  | 5.3  | 33.0 | 19p13.2    | WDR83     | WD repeat domain-containing protein 83 [Homo sapiens].             |
| 1378 | NP_055790.1    | 1570 | 171 | 8.4  | 26.7 | 19p13.2    | MAST1     | microtubule-associated serine/threonine-protein kinase 1 [Homo     |
| 1379 | NP_002721.1    | 351  | 41  | 9.1  | 25.4 | 19p13.1    | PRKACA    | cAMP-dependent protein kinase catalytic subunit alpha isoform 1    |
| 1380 | NP_997401.1    | 343  | 40  | 9.0  | 25.9 | 19p13.1    | PRKACA    | cAMP-dependent protein kinase catalytic subunit alpha isoform 2    |
| 1381 | NP_002732.3    | 942  | 104 | 6.0  | 32.4 | 19p13.12   | PKN1      | serine/threonine-protein kinase N1 isoform 2 [Homo sapiens].       |
| 1382 | NP_998725.1    | 948  | 105 | 5.8  | 32.2 | 19p13.12   | PKN1      | serine/threonine-protein kinase N1 isoform 1 [Homo sapiens].       |
| 1383 | NP_005849.1    | 692  | 76  | 4.9  | 14.0 | 19p13.1    | AKAP8     | A-kinase anchor protein 8 [Homo sapiens].                          |
| 1384 | NP_055186.2    | 646  | 72  | 4.8  | 14.6 | 19p13.12   | AKAP8L    | A-kinase anchor protein 8-like [Homo sapiens].                     |
| 1385 | NP_473454.1    | 187  | 22  | 4.4  | 28.9 | 19p13.12   | CIB3      | calcium and integrin-binding family member 3 [Homo sapiens].       |
| 1386 | NP_000206.2    | 1124 | 125 | 6.8  | 42.1 | 19p13.1    | JAK3      | tyrosine-protein kinase JAK3 [Homo sapiens].                       |
| 1387 | NP_055831.1    | 1309 | 143 | 7.9  | 29.7 | 19p13.11   | MAST3     | microtubule-associated serine/threonine-protein kinase 3 [Homo     |
| 1388 | NP_005018.1    | 728  | 82  | 6.1  | 26.1 | 19q13.2-q1 | PIK3R2    | phosphatidylinositol 3-kinase regulatory subunit beta [Homo        |
| 1389 | NP_114426.1    | 273  | 30  | 9.4  | 37.4 | 19p13.11   | TSSK6     | testis-specific serine/threonine-protein kinase 6 [Homo sapiens].  |
| 1390 | NP_055081.1    | 93   | 7   | 8.5  | 51.4 | 19q13.1    | HCST      | hematopoietic cell signal transducer isoform 1 precursor [Homo     |
| 1391 | NP_001007470.1 | 92   | 7   | 8.9  | 52.1 | 19q13.1    | HCST      | hematopoietic cell signal transducer isoform 2 precursor [Homo     |
| 1392 | NP_001230876.1 | 120  | 13  | 11.4 | 13.3 | 19q13.1    | PPP1R14A  | protein phosphatase 1 regulatory subunit 14A isoform 2 [Homo       |
| 1393 | NP_150281.1    | 147  | 17  | 9.8  | 10.2 | 19q13.1    | PPP1R14A  | protein phosphatase 1 regulatory subunit 14A isoform 1 [Homo       |
| 1394 | NP_001036065.1 | 821  | 90  | 8.1  | 42.5 | 19q13.1-q1 | MAP4K1    | mitogen-activated protein kinase kinase kinase 1 isoform 1         |
| 1395 | NP_009112.1    | 833  | 91  | 8.3  | 43.6 | 19q13.1-q1 | MAP4K1    | mitogen-activated protein kinase kinase kinase 1 isoform 2         |
| 1396 | NP_001014831.1 | 591  | 64  | 10.1 | 31.5 | 19q13.2    | PAK4      | serine/threonine-protein kinase PAK 4 isoform 1 [Homo sapiens].    |
| 1397 | NP_005875.1    | 591  | 64  | 10.1 | 31.5 | 19q13.2    | PAK4      | serine/threonine-protein kinase PAK 4 isoform 1 [Homo sapiens].    |
| 1398 | NP_001014832.1 | 591  | 64  | 10.1 | 31.5 | 19q13.2    | PAK4      | serine/threonine-protein kinase PAK 4 isoform 1 [Homo sapiens].    |
| 1399 | NP_001014834.1 | 438  | 48  | 9.6  | 38.8 | 19q13.2    | PAK4      | serine/threonine-protein kinase PAK 4 isoform 2 [Homo sapiens].    |
| 1400 | NP_001014835.1 | 438  | 48  | 9.6  | 38.8 | 19q13.2    | PAK4      | serine/threonine-protein kinase PAK 4 isoform 2 [Homo sapiens].    |
| 1401 | NP_006474.1    | 589  | 65  | 9.3  | 29.0 | 19q13.2    | DYRK1B    | dual specificity tyrosine-phosphorylation-regulated kinase 1B      |
| 1402 | NP_006475.1    | 601  | 66  | 9.3  | 28.5 | 19q13.2    | DYRK1B    | dual specificity tyrosine-phosphorylation-regulated kinase 1B      |
| 1403 | NP_004705.1    | 629  | 69  | 9.4  | 28.5 | 19q13.2    | DYRK1B    | dual specificity tyrosine-phosphorylation-regulated kinase 1B      |
| 1404 | NP_002437.2    | 954  | 104 | 6.6  | 31.3 | 19q13.2    | MAP3K10   | mitogen-activated protein kinase kinase kinase 10 [Homo sapiens].  |
| 1405 | NP_001617.1    | 481  | 56  | 5.9  | 31.4 | 19q13.1-q1 | AKT2      | RAC-beta serine/threonine-protein kinase isoform 1 [Homo sapiens]. |
| 1406 | NP_001229956.1 | 419  | 49  | 5.8  | 33.4 | 19q13.1-q1 | AKT2      | RAC-beta serine/threonine-protein kinase isoform 2 [Homo sapiens]. |
| 1407 | NP_001229957.1 | 419  | 49  | 5.8  | 33.4 | 19q13.1-q1 | AKT2      | RAC-beta serine/threonine-protein kinase isoform 2 [Homo sapiens]. |
| 1408 | NP_653286.2    | 616  | 69  | 6.2  | 32.0 | 19q13.2    | HIPK4     | homeodomain-interacting protein kinase 4 [Homo sapiens].           |
| 1409 | NP_001136027.1 | 503  | 56  | 7.1  | 37.4 | 19q13.2    | ADCK4     | uncharacterized aarF domain-containing protein kinase 4 isoform b  |

|      |                |      |     |      |      |            |         |                                                                    |
|------|----------------|------|-----|------|------|------------|---------|--------------------------------------------------------------------|
| 1410 | NP_079152.3    | 544  | 60  | 6.9  | 38.4 | 19q13.2    | ADCK4   | uncharacterized aarF domain-containing protein kinase 4 isoform a  |
| 1411 | NP_079470.1    | 683  | 75  | 4.9  | 21.5 | 19q13.1    | ITPKC   | inositol-trisphosphate 3-kinase C [Homo sapiens].                  |
| 1412 | NP_068713.2    | 894  | 98  | 5.1  | 33.9 | 19q13.1    | AXL     | tyrosine-protein kinase receptor UFO isoform 1 precursor [Homo     |
| 1413 | NP_001690.2    | 885  | 97  | 5.1  | 34.4 | 19q13.1    | AXL     | tyrosine-protein kinase receptor UFO isoform 2 precursor [Homo     |
| 1414 | NP_063937.2    | 483  | 51  | 8.9  | 38.5 | 19q13.2    | GSK3A   | glycogen synthase kinase-3 alpha [Homo sapiens].                   |
| 1415 | NP_001005376.1 | 281  | 29  | 5.8  | 23.2 | 19q13      | PLAUR   | urokinase plasminogen activator surface receptor isoform 2         |
| 1416 | NP_001005377.1 | 290  | 30  | 5.6  | 30.6 | 19q13      | PLAUR   | urokinase plasminogen activator surface receptor isoform 3         |
| 1417 | NP_002650.1    | 335  | 35  | 6.1  | 29.1 | 19q13      | PLAUR   | urokinase plasminogen activator surface receptor isoform 1         |
| 1418 | NP_001186796.1 | 752  | 83  | 10.0 | 24.6 | 19q13.3    | MARK4   | MAP/microtubule affinity-regulating kinase 4 isoform 1 [Homo       |
| 1419 | NP_113605.2    | 688  | 75  | 10.2 | 21.5 | 19q13.3    | MARK4   | MAP/microtubule affinity-regulating kinase 4 isoform 2 [Homo       |
| 1420 | NP_001815.2    | 381  | 43  | 6.8  | 28.1 | 19q13.32   | CKM     | creatine kinase M-type [Homo sapiens].                             |
| 1421 | NP_001075031.1 | 625  | 70  | 4.6  | 37.1 | 19q13.3    | DMPK    | myotonin-protein kinase isoform 4 [Homo sapiens].                  |
| 1422 | NP_001075029.1 | 624  | 69  | 4.8  | 39.4 | 19q13.3    | DMPK    | myotonin-protein kinase isoform 3 [Homo sapiens].                  |
| 1423 | NP_004400.4    | 629  | 69  | 4.8  | 39.7 | 19q13.3    | DMPK    | myotonin-protein kinase isoform 2 [Homo sapiens].                  |
| 1424 | NP_001075032.1 | 639  | 70  | 4.9  | 38.0 | 19q13.3    | DMPK    | myotonin-protein kinase isoform 1 [Homo sapiens].                  |
| 1425 | NP_001073349.1 | 878  | 97  | 6.4  | 37.5 | 19q13.3    | PRKD2   | serine/threonine-protein kinase D2 isoform A [Homo sapiens].       |
| 1426 | NP_057541.2    | 878  | 97  | 6.4  | 37.5 | 19q13.3    | PRKD2   | serine/threonine-protein kinase D2 isoform A [Homo sapiens].       |
| 1427 | NP_001073350.1 | 878  | 97  | 6.4  | 37.5 | 19q13.3    | PRKD2   | serine/threonine-protein kinase D2 isoform A [Homo sapiens].       |
| 1428 | NP_001073351.1 | 721  | 80  | 6.9  | 34.4 | 19q13.3    | PRKD2   | serine/threonine-protein kinase D2 isoform B [Homo sapiens].       |
| 1429 | NP_001073903.1 | 1489 | 157 | 4.7  | 27.0 | 19q13.33   | LMTK3   | serine/threonine-protein kinase LMTK3 [Homo sapiens].              |
| 1430 | NP_064511.2    | 654  | 69  | 6.5  | 46.2 | 19q13.2    | SPHK2   | sphingosine kinase 2 isoform a [Homo sapiens].                     |
| 1431 | NP_001191088.1 | 654  | 69  | 6.5  | 46.2 | 19q13.2    | SPHK2   | sphingosine kinase 2 isoform a [Homo sapiens].                     |
| 1432 | NP_001191087.1 | 595  | 63  | 6.1  | 46.9 | 19q13.2    | SPHK2   | sphingosine kinase 2 isoform b [Homo sapiens].                     |
| 1433 | NP_001191089.1 | 618  | 65  | 6.7  | 48.2 | 19q13.2    | SPHK2   | sphingosine kinase 2 isoform c [Homo sapiens].                     |
| 1434 | NP_001230805.1 | 448  | 47  | 5.2  | 51.8 | 19q13.2    | SPHK2   | sphingosine kinase 2 isoform d [Homo sapiens].                     |
| 1435 | NP_001191431.1 | 235  | 24  | 7.6  | 35.9 | 19q13.3    | FLT3LG  | fms-related tyrosine kinase 3 ligand precursor [Homo sapiens].     |
| 1436 | NP_001191432.1 | 235  | 24  | 7.6  | 35.9 | 19q13.3    | FLT3LG  | fms-related tyrosine kinase 3 ligand precursor [Homo sapiens].     |
| 1437 | NP_001450.2    | 235  | 24  | 7.6  | 35.9 | 19q13.3    | FLT3LG  | fms-related tyrosine kinase 3 ligand precursor [Homo sapiens].     |
| 1438 | NP_068379.1    | 592  | 65  | 5.6  | 20.4 | 19q13.3    | TSKS    | testis-specific serine kinase substrate [Homo sapiens].            |
| 1439 | NP_009185.2    | 521  | 57  | 8.5  | 39.9 | 19q13.3-q1 | PNKP    | bifunctional polynucleotide phosphatase/kinase [Homo sapiens].     |
| 1440 | NP_001020949.1 | 424  | 48  | 9.2  | 31.1 | 19q13      | VRK3    | inactive serine/threonine-protein kinase VRK3 isoform 2 [Homo      |
| 1441 | NP_057524.3    | 474  | 53  | 9.3  | 28.7 | 19q13      | VRK3    | inactive serine/threonine-protein kinase VRK3 isoform 1 [Homo      |
| 1442 | NP_002730.1    | 697  | 78  | 7.2  | 32.4 | 19q13.4    | PRKCG   | protein kinase C gamma type [Homo sapiens].                        |
| 1443 | NP_573441.2    | 723  | 80  | 5.7  | 22.4 | 19q13.42   | EPS8L1  | epidermal growth factor receptor kinase substrate 8-like protein 1 |
| 1444 | NP_060199.3    | 596  | 66  | 5.9  | 18.5 | 19q13.42   | EPS8L1  | epidermal growth factor receptor kinase substrate 8-like protein 1 |
| 1445 | NP_115806.1    | 778  | 85  | 9.7  | 26.3 | 19q13.4    | BRSK1   | serine/threonine-protein kinase BRSK1 [Homo sapiens].              |
| 1446 | NP_001094871.2 | 348  | 38  | 5.2  | 44.8 | 19q13.42   | SBK2    | serine/threonine-protein kinase SBK2 [Homo sapiens].               |
| 1447 | NP_001186753.1 | 359  | 38  | 4.6  | 47.1 | 19q13.42   | SGK110  | putative uncharacterized serine/threonine-protein kinase SgK110    |
| 1448 | NP_001015879.1 | 290  | 34  | 9.0  | 32.4 | 19q13.43   | AURKC   | aurora kinase C isoform 2 [Homo sapiens].                          |
| 1449 | NP_001015878.1 | 309  | 36  | 9.0  | 32.7 | 19q13.43   | AURKC   | aurora kinase C isoform 1 [Homo sapiens].                          |
| 1450 | NP_003151.2    | 275  | 32  | 9.0  | 34.2 | 19q13.43   | AURKC   | aurora kinase C isoform 3 [Homo sapiens].                          |
| 1451 | NP_808227.1    | 391  | 45  | 7.6  | 30.4 | 20p13      | CSNK2A1 | casein kinase II subunit alpha isoform a [Homo sapiens].           |
| 1452 | NP_001886.1    | 391  | 45  | 7.6  | 30.4 | 20p13      | CSNK2A1 | casein kinase II subunit alpha isoform a [Homo sapiens].           |
| 1453 | NP_808228.1    | 255  | 29  | 6.2  | 33.7 | 20p13      | CSNK2A1 | casein kinase II subunit alpha isoform b [Homo sapiens].           |
| 1454 | NP_001186715.1 | 97   | 11  | 7.1  | 28.9 | 20p13      | FKBP1A  | peptidyl-prolyl cis-trans isomerase FKBP1A isoform b [Homo         |
| 1455 | NP_000792.1    | 108  | 12  | 8.6  | 25.9 | 20p13      | FKBP1A  | peptidyl-prolyl cis-trans isomerase FKBP1A isoform a [Homo         |
| 1456 | NP_463460.1    | 108  | 12  | 8.6  | 25.9 | 20p13      | FKBP1A  | peptidyl-prolyl cis-trans isomerase FKBP1A isoform a [Homo         |
| 1457 | NP_543026.2    | 534  | 58  | 10.1 | 33.0 | 20p13      | STK35   | serine/threonine-protein kinase 35 [Homo sapiens].                 |
| 1458 | NP_068598.1    | 764  | 87  | 8.0  | 44.5 | 20p13      | FASTKD5 | FAST kinase domain-containing protein 5 [Homo sapiens].            |
| 1459 | NP_705902.2    | 570  | 47  | 7.4  | 40.7 | 20p13      | PANK2   | pantothenate kinase 2, mitochondrial isoform 1 preproprotein [Homo |
| 1460 | NP_079236.3    | 279  | 31  | 5.7  | 47.0 | 20p13      | PANK2   | pantothenate kinase 2, mitochondrial isoform 2 [Homo sapiens].     |
| 1461 | NP_705904.1    | 279  | 31  | 5.7  | 47.0 | 20p13      | PANK2   | pantothenate kinase 2, mitochondrial isoform 2 [Homo sapiens].     |
| 1462 | NP_065074.1    | 719  | 81  | 8.0  | 25.5 | 20p12      | PAK7    | serine/threonine-protein kinase PAK 7 [Homo sapiens].              |
| 1463 | NP_817127.1    | 719  | 81  | 8.0  | 25.5 | 20p12      | PAK7    | serine/threonine-protein kinase PAK 7 [Homo sapiens].              |
| 1464 | NP_149109.1    | 596  | 65  | 6.6  | 27.7 | 20q13.31   | MYLK2   | myosin light chain kinase 2, skeletal/cardiac muscle [Homo         |
| 1465 | NP_002101.2    | 526  | 60  | 6.3  | 30.0 | 20q11-q12  | HCK     | tyrosine-protein kinase HCK isoform a [Homo sapiens].              |
| 1466 | NP_001165601.1 | 525  | 60  | 6.3  | 29.9 | 20q11-q12  | HCK     | tyrosine-protein kinase HCK isoform c [Homo sapiens].              |
| 1467 | NP_001165603.1 | 506  | 57  | 6.4  | 31.4 | 20q11-q12  | HCK     | tyrosine-protein kinase HCK isoform e [Homo sapiens].              |
| 1468 | NP_001165600.1 | 505  | 57  | 6.4  | 31.3 | 20q11-q12  | HCK     | tyrosine-protein kinase HCK isoform b [Homo sapiens].              |

|      |                |      |     |      |      |            |        |                                                                        |
|------|----------------|------|-----|------|------|------------|--------|------------------------------------------------------------------------|
| 1469 | NP_001165604.1 | 505  | 57  | 6.4  | 31.3 | 20q11-q12  | HCK    | tyrosine-protein kinase HCK isoform b [Homo sapiens].                  |
| 1470 | NP_001165602.1 | 504  | 57  | 6.4  | 31.2 | 20q11-q12  | HCK    | tyrosine-protein kinase HCK isoform d [Homo sapiens].                  |
| 1471 | NP_005408.1    | 536  | 60  | 7.2  | 28.2 | 20q12-q13  | SRC    | proto-oncogene tyrosine-protein kinase Src [Homo sapiens].             |
| 1472 | NP_938033.1    | 536  | 60  | 7.2  | 28.2 | 20q12-q13  | SRC    | proto-oncogene tyrosine-protein kinase Src [Homo sapiens].             |
| 1473 | NP_057360.2    | 427  | 48  | 7.2  | 34.0 | 20q13.2    | SGK2   | serine/threonine-protein kinase Sgk2 isoform beta [Homo sapiens].      |
| 1474 | NP_001186193.1 | 367  | 41  | 6.3  | 36.2 | 20q13.2    | SGK2   | serine/threonine-protein kinase Sgk2 isoform alpha [Homo sapiens].     |
| 1475 | NP_733794.1    | 367  | 41  | 6.3  | 36.2 | 20q13.2    | SGK2   | serine/threonine-protein kinase Sgk2 isoform alpha [Homo sapiens].     |
| 1476 | NP_861520.1    | 76   | 8   | 3.9  | 13.2 | 20q12-q13  | PKIG   | cAMP-dependent protein kinase inhibitor gamma [Homo sapiens].          |
| 1477 | NP_861521.1    | 76   | 8   | 3.9  | 13.2 | 20q12-q13  | PKIG   | cAMP-dependent protein kinase inhibitor gamma [Homo sapiens].          |
| 1478 | NP_008997.1    | 76   | 8   | 3.9  | 13.2 | 20q12-q13  | PKIG   | cAMP-dependent protein kinase inhibitor gamma [Homo sapiens].          |
| 1479 | NP_003395.1    | 246  | 28  | 4.6  | 24.0 | 20q13.1    | YWHAB  | 14-3-3 protein beta/alpha [Homo sapiens].                              |
| 1480 | NP_647539.1    | 246  | 28  | 4.6  | 24.0 | 20q13.1    | YWHAB  | 14-3-3 protein beta/alpha [Homo sapiens].                              |
| 1481 | NP_006273.1    | 487  | 56  | 4.8  | 31.6 | 20q11.2-q1 | STK4   | serine/threonine-protein kinase 4 [Homo sapiens].                      |
| 1482 | NP_898869.1    | 1135 | 125 | 6.0  | 19.6 | 20q13.12   | ZMYND8 | protein kinase C-binding protein 1 isoform c [Homo sapiens].           |
| 1483 | NP_036540.3    | 1160 | 128 | 6.0  | 19.5 | 20q13.12   | ZMYND8 | protein kinase C-binding protein 1 isoform b [Homo sapiens].           |
| 1484 | NP_898868.1    | 1188 | 132 | 6.2  | 19.1 | 20q13.12   | ZMYND8 | protein kinase C-binding protein 1 isoform a [Homo sapiens].           |
| 1485 | NP_060901.2    | 306  | 35  | 8.9  | 24.5 | 20q13.2    | DOK5   | docking protein 5 [Homo sapiens].                                      |
| 1486 | NP_003591.2    | 403  | 46  | 9.7  | 24.1 | 20q13      | AURKA  | aurora kinase A [Homo sapiens].                                        |
| 1487 | NP_940835.1    | 403  | 46  | 9.7  | 24.1 | 20q13      | AURKA  | aurora kinase A [Homo sapiens].                                        |
| 1488 | NP_940836.1    | 403  | 46  | 9.7  | 24.1 | 20q13      | AURKA  | aurora kinase A [Homo sapiens].                                        |
| 1489 | NP_940837.1    | 403  | 46  | 9.7  | 24.1 | 20q13      | AURKA  | aurora kinase A [Homo sapiens].                                        |
| 1490 | NP_940838.1    | 403  | 46  | 9.7  | 24.1 | 20q13      | AURKA  | aurora kinase A [Homo sapiens].                                        |
| 1491 | NP_940839.1    | 403  | 46  | 9.7  | 24.1 | 20q13      | AURKA  | aurora kinase A [Homo sapiens].                                        |
| 1492 | NP_005966.1    | 451  | 52  | 6.6  | 33.7 | 20q13.3    | PTK6   | protein-tyrosine kinase 6 Isoform 1 [Homo sapiens].                    |
| 1493 | NP_001243287.1 | 134  | 14  | 5.2  | 24.6 | 20q13.3    | PTK6   | protein-tyrosine kinase 6 Isoform 2 [Homo sapiens].                    |
| 1494 | NP_543013.1    | 488  | 55  | 8.1  | 37.5 | 20q13.33   | SRMS   | tyrosine-protein kinase Srms [Homo sapiens].                           |
| 1495 | NP_055401.1    | 714  | 80  | 9.4  | 29.1 | 21q22.1    | HUNK   | hormonally up-regulated neu tumor-associated kinase [Homo sapiens].    |
| 1496 | NP_005797.1    | 323  | 32  | 9.5  | 43.3 | 21q22.11   | OLIG2  | oligodendrocyte transcription factor 2 [Homo sapiens].                 |
| 1497 | NP_001387.2    | 763  | 86  | 8.9  | 24.0 | 21q22.13   | DYRK1A | dual specificity tyrosine-phosphorylation-regulated kinase 1A          |
| 1498 | NP_569120.1    | 754  | 85  | 9.0  | 23.2 | 21q22.13   | DYRK1A | dual specificity tyrosine-phosphorylation-regulated kinase 1A          |
| 1499 | NP_569122.1    | 529  | 60  | 9.4  | 31.2 | 21q22.13   | DYRK1A | dual specificity tyrosine-phosphorylation-regulated kinase 1A          |
| 1500 | NP_567824.1    | 584  | 66  | 9.3  | 31.0 | 21q22.13   | DYRK1A | dual specificity tyrosine-phosphorylation-regulated kinase 1A          |
| 1501 | NP_065690.2    | 784  | 86  | 6.6  | 37.5 | 21q22.3    | RIPK4  | receptor-interacting serine/threonine-protein kinase 4 [Homo sapiens]. |
| 1502 | NP_775490.2    | 783  | 85  | 6.8  | 40.2 | 21q22.3    | SIK1   | serine/threonine-protein kinase SIK1 [Homo sapiens].                   |
| 1503 | NP_002617.3    | 780  | 85  | 7.2  | 46.8 | 21q22.3    | PFKL   | 6-phosphofructokinase, liver type [Homo sapiens].                      |
| 1504 | NP_443732.3    | 358  | 41  | 9.0  | 29.1 | 22q11.21   | TSSK2  | testis-specific serine/threonine-protein kinase 2 [Homo sapiens].      |
| 1505 | NP_477352.3    | 2102 | 237 | 6.6  | 44.5 | 22q11.21   | PI4KA  | phosphatidylinositol 4-kinase alpha isoform 1 [Homo sapiens].          |
| 1506 | NP_002641.1    | 854  | 97  | 6.9  | 40.3 | 22q11.21   | PI4KA  | phosphatidylinositol 4-kinase alpha isoform 2 [Homo sapiens].          |
| 1507 | NP_002736.3    | 360  | 41  | 6.5  | 35.3 | 22q11.21   | MAPK1  | mitogen-activated protein kinase 1 [Homo sapiens].                     |
| 1508 | NP_620407.1    | 360  | 41  | 6.5  | 35.3 | 22q11.21   | MAPK1  | mitogen-activated protein kinase 1 [Homo sapiens].                     |
| 1509 | NP_055449.1    | 454  | 50  | 4.9  | 37.9 | 22q11.22   | PPM1F  | protein phosphatase 1F [Homo sapiens].                                 |
| 1510 | NP_005151.2    | 688  | 80  | 7.4  | 26.3 | 22q12.1    | ADRBK2 | beta-adrenergic receptor kinase 2 [Homo sapiens].                      |
| 1511 | NP_665861.1    | 514  | 58  | 5.7  | 28.8 | 22q12.1    | CHEK2  | serine/threonine-protein kinase Chk2 isoform b [Homo sapiens].         |
| 1512 | NP_009125.1    | 543  | 61  | 5.6  | 28.0 | 22q12.1    | CHEK2  | serine/threonine-protein kinase Chk2 isoform a [Homo sapiens].         |
| 1513 | NP_001005735.1 | 586  | 65  | 5.8  | 27.8 | 22q12.1    | CHEK2  | serine/threonine-protein kinase Chk2 isoform c [Homo sapiens].         |
| 1514 | NP_001244316.1 | 322  | 36  | 6.7  | 37.0 | 22q12.1    | CHEK2  | serine/threonine-protein kinase Chk2 isoform d [Homo sapiens].         |
| 1515 | NP_005560.1    | 638  | 72  | 6.8  | 34.3 | 22q12.2    | LIMK2  | LIM domain kinase 2 isoform 2a [Homo sapiens].                         |
| 1516 | NP_057952.1    | 617  | 70  | 7.1  | 35.8 | 22q12.2    | LIMK2  | LIM domain kinase 2 isoform 2b [Homo sapiens].                         |
| 1517 | NP_001026971.1 | 686  | 78  | 6.6  | 33.2 | 22q12.2    | LIMK2  | LIM domain kinase 2 isoform 1 [Homo sapiens].                          |
| 1518 | NP_114439.1    | 641  | 69  | 8.0  | 39.3 | 22q12.2    | PATZ1  | POZ-, AT hook-, and zinc finger-containing protein 1 long A isoform    |
| 1519 | NP_055138.2    | 687  | 74  | 8.2  | 39.0 | 22q12.2    | PATZ1  | POZ-, AT hook-, and zinc finger-containing protein 1 long C isoform    |
| 1520 | NP_114441.1    | 537  | 58  | 8.5  | 40.2 | 22q12.2    | PATZ1  | POZ-, AT hook-, and zinc finger-containing protein 1 long B isoform    |
| 1521 | NP_114440.1    | 537  | 58  | 8.4  | 43.4 | 22q12.2    | PATZ1  | POZ-, AT hook-, and zinc finger-containing protein 1 short isoform     |
| 1522 | NP_001034672.1 | 415  | 47  | 5.0  | 34.5 | 22q13.1    | PICK1  | PRKCA-binding protein [Homo sapiens].                                  |
| 1523 | NP_036539.1    | 415  | 47  | 5.0  | 34.5 | 22q13.1    | PICK1  | PRKCA-binding protein [Homo sapiens].                                  |
| 1524 | NP_001034673.1 | 415  | 47  | 5.0  | 34.5 | 22q13.1    | PICK1  | PRKCA-binding protein [Homo sapiens].                                  |
| 1525 | NP_001885.1    | 416  | 47  | 10.0 | 25.2 | 22q13.1    | CSNK1E | casein kinase I isoform epsilon [Homo sapiens].                        |
| 1526 | NP_689407.1    | 416  | 47  | 10.0 | 25.2 | 22q13.1    | CSNK1E | casein kinase I isoform epsilon [Homo sapiens].                        |
| 1527 | NP_705717.1    | 462  | 50  | 5.3  | 37.4 | 22q13.1    | TAB1   | TGF-beta-activated kinase 1 and MAP3K7-binding protein 1 isoform       |

|      |                |      |     |      |      |            |          |                                                                    |
|------|----------------|------|-----|------|------|------------|----------|--------------------------------------------------------------------|
| 1528 | NP_006107.1    | 504  | 55  | 5.2  | 32.5 | 22q13.1    | TAB1     | TGF-beta-activated kinase 1 and MAP3K7-binding protein 1 isoform   |
| 1529 | NP_001171900.1 | 445  | 51  | 5.1  | 10.8 | 22q13.2-q1 | PACSIN2  | protein kinase C and casein kinase substrate in neurons protein 2  |
| 1530 | NP_009160.2    | 486  | 56  | 4.9  | 9.9  | 22q13.2-q1 | PACSIN2  | protein kinase C and casein kinase substrate in neurons protein 2  |
| 1531 | NP_001171899.1 | 486  | 56  | 4.9  | 9.9  | 22q13.2-q1 | PACSIN2  | protein kinase C and casein kinase substrate in neurons protein 2  |
| 1532 | NP_073603.2    | 537  | 60  | 8.1  | 42.5 | 22q13.31   | CERK     | ceramide kinase [Homo sapiens].                                    |
| 1533 | NP_001001852.2 | 326  | 36  | 5.7  | 48.2 | 22q13      | PIM3     | serine/threonine-protein kinase pim-3 [Homo sapiens].              |
| 1534 | NP_002960.2    | 367  | 42  | 6.0  | 32.4 | 22q13.33   | MAPK12   | mitogen-activated protein kinase 12 [Homo sapiens].                |
| 1535 | NP_002742.3    | 364  | 41  | 5.5  | 36.3 | 22q13.33   | MAPK11   | mitogen-activated protein kinase 11 [Homo sapiens].                |
| 1536 | NP_005189.2    | 395  | 45  | 5.2  | 35.9 | 22q13.33   | CHKB     | choline/ethanolamine kinase [Homo sapiens].                        |
| 1537 | NP_036456.1    | 824  | 88  | 4.2  | 27.2 | 22q13.33   | MAPK8IP2 | C-Jun-amino-terminal kinase-interacting protein 2 isoform 1 [Homo  |
| 1538 | NP_057515.1    | 797  | 85  | 4.2  | 29.1 | 22q13.33   | MAPK8IP2 | C-Jun-amino-terminal kinase-interacting protein 2 isoform 2 [Homo  |
| 1539 | NP_005079.2    | 695  | 81  | 10.2 | 21.7 | Xp22.33 an | AKAP17A  | A-kinase anchor protein 17A isoform 1 [Homo sapiens].              |
| 1540 | NP_005035.1    | 358  | 41  | 6.4  | 34.9 | Xp22.3     | PRKX     | cAMP-dependent protein kinase catalytic subunit PRKX [Homo         |
| 1541 | NP_001034180.1 | 321  | 35  | 6.0  | 58.3 | Xp22.2     | PRPS2    | ribose-phosphate pyrophosphokinase 2 isoform 1 [Homo sapiens].     |
| 1542 | NP_002756.1    | 318  | 35  | 6.2  | 58.8 | Xp22.2     | PRPS2    | ribose-phosphate pyrophosphokinase 2 isoform 2 [Homo sapiens].     |
| 1543 | NP_975010.1    | 675  | 78  | 8.5  | 25.8 | Xp22.2     | BMX      | cytoplasmic tyrosine-protein kinase BMX [Homo sapiens].            |
| 1544 | NP_001712.1    | 675  | 78  | 8.5  | 25.8 | Xp22.2     | BMX      | cytoplasmic tyrosine-protein kinase BMX [Homo sapiens].            |
| 1545 | NP_003150.1    | 1030 | 116 | 9.9  | 17.9 | Xp22       | CDKL5    | cyclin-dependent kinase-like 5 [Homo sapiens].                     |
| 1546 | NP_001032420.1 | 1030 | 116 | 9.9  | 17.9 | Xp22       | CDKL5    | cyclin-dependent kinase-like 5 [Homo sapiens].                     |
| 1547 | NP_000283.1    | 1235 | 138 | 6.0  | 41.9 | Xp22.2-p22 | PHKA2    | phosphorylase b kinase regulatory subunit alpha, liver isoform     |
| 1548 | NP_001001671.3 | 1313 | 147 | 5.3  | 33.4 | Xp22.12    | MAP3K15  | mitogen-activated protein kinase kinase kinase 15 [Homo sapiens].  |
| 1549 | NP_114098.1    | 665  | 73  | 6.2  | 21.1 | Xp22.1-p21 | SH3KBP1  | SH3 domain-containing kinase-binding protein 1 isoform a [Homo     |
| 1550 | NP_001019837.1 | 628  | 69  | 7.4  | 21.2 | Xp22.1-p21 | SH3KBP1  | SH3 domain-containing kinase-binding protein 1 isoform b [Homo     |
| 1551 | NP_001171889.1 | 427  | 47  | 9.3  | 20.6 | Xp22.1-p21 | SH3KBP1  | SH3 domain-containing kinase-binding protein 1 isoform c [Homo     |
| 1552 | NP_004577.1    | 740  | 84  | 6.4  | 35.0 | Xp22.2-p22 | RPS6KA3  | ribosomal protein S6 kinase alpha-3 [Homo sapiens].                |
| 1553 | NP_055742.2    | 1034 | 118 | 6.3  | 22.4 | Xp22.12    | CNKSR2   | connector enhancer of kinase suppressor of ras 2 isoform 1 [Homo   |
| 1554 | NP_001162118.1 | 1004 | 114 | 6.2  | 22.9 | Xp22.12    | CNKSR2   | connector enhancer of kinase suppressor of ras 2 isoform 2 [Homo   |
| 1555 | NP_001162119.1 | 898  | 102 | 6.6  | 22.0 | Xp22.12    | CNKSR2   | connector enhancer of kinase suppressor of ras 2 isoform 3 [Homo   |
| 1556 | NP_001162120.1 | 849  | 96  | 6.2  | 20.8 | Xp22.12    | CNKSR2   | connector enhancer of kinase suppressor of ras 2 isoform 4 [Homo   |
| 1557 | NP_001135858.1 | 415  | 48  | 8.9  | 32.5 | Xp22.11    | PKD3     | pyruvate dehydrogenase kinase, isozyme 3 isoform 1 [Homo sapiens]. |
| 1558 | NP_005382.1    | 406  | 47  | 8.6  | 33.3 | Xp22.11    | PKD3     | pyruvate dehydrogenase kinase, isozyme 3 isoform 2 [Homo sapiens]. |
| 1559 | NP_001191948.1 | 559  | 61  | 6.1  | 49.6 | Xp21.3     | GK       | glycerol kinase isoform d [Homo sapiens].                          |
| 1560 | NP_976325.1    | 530  | 58  | 6.1  | 47.5 | Xp21.3     | GK       | glycerol kinase isoform a [Homo sapiens].                          |
| 1561 | NP_001121599.1 | 553  | 61  | 5.9  | 49.7 | Xp21.3     | GK       | glycerol kinase isoform c [Homo sapiens].                          |
| 1562 | NP_000158.1    | 524  | 57  | 5.9  | 47.7 | Xp21.3     | GK       | glycerol kinase isoform b [Homo sapiens].                          |
| 1563 | NP_690000.2    | 712  | 79  | 8.4  | 16.3 | Xp21.2     | TAB3     | TGF-beta-activated kinase 1 and MAP3K7-binding protein 3 [Homo     |
| 1564 | NP_001119527.1 | 897  | 102 | 5.9  | 33.9 | Xp11.4     | CASK     | peripheral plasma membrane protein CASK isoform 3 [Homo sapiens].  |
| 1565 | NP_001119526.1 | 898  | 102 | 5.9  | 34.1 | Xp11.4     | CASK     | peripheral plasma membrane protein CASK isoform 2 [Homo sapiens].  |
| 1566 | NP_003679.2    | 921  | 105 | 6.0  | 33.2 | Xp11.4     | CASK     | peripheral plasma membrane protein CASK isoform 1 [Homo sapiens].  |
| 1567 | NP_148978.2    | 502  | 56  | 7.0  | 25.9 | Xp11       | CDK16    | cyclin-dependent kinase 16 isoform 2 [Homo sapiens].               |
| 1568 | NP_001163931.1 | 570  | 63  | 8.1  | 28.2 | Xp11       | CDK16    | cyclin-dependent kinase 16 isoform 3 [Homo sapiens].               |
| 1569 | NP_006192.1    | 496  | 56  | 7.4  | 26.2 | Xp11       | CDK16    | cyclin-dependent kinase 16 isoform 1 [Homo sapiens].               |
| 1570 | NP_001243125.1 | 609  | 68  | 9.3  | 33.5 | Xp11.4-p11 | ARAF     | serine/threonine-protein kinase A-Raf isoform 2 [Homo sapiens].    |
| 1571 | NP_001645.1    | 606  | 68  | 9.2  | 33.7 | Xp11.4-p11 | ARAF     | serine/threonine-protein kinase A-Raf isoform 1 [Homo sapiens].    |
| 1572 | NP_001243126.1 | 186  | 21  | 8.5  | 34.4 | Xp11.4-p11 | ARAF     | serine/threonine-protein kinase A-Raf isoform 3 [Homo sapiens].    |
| 1573 | NP_001107595.1 | 428  | 45  | 6.5  | 37.9 | Xp11.2     | ELK1     | ETS domain-containing protein Elk-1 isoform a [Homo sapiens].      |
| 1574 | NP_005220.2    | 428  | 45  | 6.5  | 37.9 | Xp11.2     | ELK1     | ETS domain-containing protein Elk-1 isoform a [Homo sapiens].      |
| 1575 | NP_001244097.1 | 95   | 11  | 9.8  | 18.9 | Xp11.2     | ELK1     | ETS domain-containing protein Elk-1 isoform b [Homo sapiens].      |
| 1576 | NP_006866.2    | 311  | 34  | 5.5  | 41.5 | Xp11.23    | PIM2     | serine/threonine-protein kinase pim-2 [Homo sapiens].              |
| 1577 | NP_003877.2    | 854  | 94  | 6.5  | 27.6 | Xp11.2     | AKAP4    | A-kinase anchor protein 4 isoform 1 [Homo sapiens].                |
| 1578 | NP_647450.1    | 845  | 93  | 6.7  | 27.7 | Xp11.2     | AKAP4    | A-kinase anchor protein 4 isoform 2 [Homo sapiens].                |
| 1579 | NP_001013764.1 | 1271 | 142 | 5.3  | 31.3 | Xp11.22    | DGKK     | diacylglycerol kinase kappa [Homo sapiens].                        |
| 1580 | NP_001002838.1 | 1743 | 192 | 5.4  | 25.0 | Xp11.22    | WNK3     | serine/threonine-protein kinase WNK3 isoform 2 [Homo sapiens].     |
| 1581 | NP_065973.2    | 1800 | 198 | 5.7  | 24.7 | Xp11.22    | WNK3     | serine/threonine-protein kinase WNK3 isoform 1 [Homo sapiens].     |
| 1582 | NP_004420.1    | 346  | 35  | 8.6  | 27.9 | Xq12       | EFNB1    | ephrin-B1 precursor [Homo sapiens].                                |
| 1583 | NP_001165907.1 | 1151 | 129 | 5.6  | 42.6 | Xq12-q13   | PHKA1    | phosphorylase b kinase regulatory subunit alpha, skeletal muscle   |
| 1584 | NP_001116142.1 | 1210 | 136 | 5.8  | 42.0 | Xq12-q13   | PHKA1    | phosphorylase b kinase regulatory subunit alpha, skeletal muscle   |
| 1585 | NP_002628.2    | 1223 | 137 | 5.8  | 41.6 | Xq12-q13   | PHKA1    | phosphorylase b kinase regulatory subunit alpha, skeletal muscle   |
| 1586 | NP_000282.1    | 417  | 45  | 8.1  | 47.5 | Xq13.3     | PGK1     | phosphoglycerate kinase 1 [Homo sapiens].                          |

|      |                |     |    |     |      |            |           |                                                                               |
|------|----------------|-----|----|-----|------|------------|-----------|-------------------------------------------------------------------------------|
| 1587 | NP_055311.1    | 745 | 84 | 5.9 | 38.1 | Xq21       | RPS6KA6   | ribosomal protein S6 kinase alpha-6 [Homo sapiens].                           |
| 1588 | NP_000052.1    | 659 | 76 | 7.6 | 28.2 | Xq21.33-q2 | BTX       | tyrosine-protein kinase BTK [Homo sapiens].                                   |
| 1589 | NP_002755.1    | 318 | 35 | 6.5 | 56.6 | Xq21.32-q2 | PRPS1     | ribose-phosphate pyrophosphokinase 1 isoform 1 [Homo sapiens].                |
| 1590 | NP_001191331.1 | 114 | 12 | 6.2 | 65.8 | Xq21.32-q2 | PRPS1     | ribose-phosphate pyrophosphokinase 1 isoform 2 [Homo sapiens].                |
| 1591 | NP_001121640.1 | 580 | 65 | 5.3 | 30.3 | Xq23       | PAK3      | serine/threonine-protein kinase PAK 3 isoform b [Homo sapiens].               |
| 1592 | NP_001121644.1 | 565 | 63 | 5.3 | 31.0 | Xq23       | PAK3      | serine/threonine-protein kinase PAK 3 isoform c [Homo sapiens].               |
| 1593 | NP_001121645.1 | 559 | 62 | 5.2 | 30.9 | Xq23       | PAK3      | serine/threonine-protein kinase PAK 3 isoform d [Homo sapiens].               |
| 1594 | NP_002569.1    | 544 | 61 | 5.3 | 31.8 | Xq23       | PAK3      | serine/threonine-protein kinase PAK 3 isoform a [Homo sapiens].               |
| 1595 | NP_001121638.1 | 544 | 61 | 5.3 | 31.8 | Xq23       | PAK3      | serine/threonine-protein kinase PAK 3 isoform a [Homo sapiens].               |
| 1596 | NP_001121639.1 | 544 | 61 | 5.3 | 31.8 | Xq23       | PAK3      | serine/threonine-protein kinase PAK 3 isoform a [Homo sapiens].               |
| 1597 | NP_848928.1    | 197 | 23 | 6.3 | 31.0 | Xq24       | AKAP14    | A-kinase anchor protein 14 isoform a [Homo sapiens].                          |
| 1598 | NP_001008534.1 | 137 | 16 | 4.8 | 22.6 | Xq24       | AKAP14    | A-kinase anchor protein 14 isoform b [Homo sapiens].                          |
| 1599 | NP_001008535.1 | 89  | 10 | 4.3 | 15.7 | Xq24       | AKAP14    | A-kinase anchor protein 14 isoform c [Homo sapiens].                          |
| 1600 | NP_057626.2    | 416 | 47 | 5.0 | 33.7 | Xq26.2     | MST4      | serine/threonine-protein kinase MST4 isoform 1 [Homo sapiens].                |
| 1601 | NP_001035917.1 | 354 | 40 | 5.0 | 32.2 | Xq26.2     | MST4      | serine/threonine-protein kinase MST4 isoform 3 [Homo sapiens].                |
| 1602 | NP_001035918.1 | 339 | 38 | 5.7 | 36.0 | Xq26.2     | MST4      | serine/threonine-protein kinase MST4 isoform 2 [Homo sapiens].                |
| 1603 | NP_001386.1    | 384 | 42 | 5.7 | 39.8 | Xq28       | DUSP9     | dual specificity protein phosphatase 9 [Homo sapiens].                        |
| 1604 | NP_001034671.3 | 426 | 47 | 6.8 | 33.8 | Xq28       | PNCK      | calcium/calmodulin-dependent protein kinase type 1B isoform a [Homo sapiens]. |
| 1605 | NP_001129212.1 | 360 | 40 | 6.8 | 36.7 | Xq28       | PNCK      | calcium/calmodulin-dependent protein kinase type 1B isoform b [Homo sapiens]. |
| 1606 | NP_055185.2    | 567 | 62 | 6.9 | 34.2 | Xq28       | SRPK3     | SRSF protein kinase 3 isoform 1 [Homo sapiens].                               |
| 1607 | NP_001164231.1 | 566 | 62 | 6.9 | 34.3 | Xq28       | SRPK3     | SRSF protein kinase 3 isoform 2 [Homo sapiens].                               |
| 1608 | NP_001164232.1 | 533 | 59 | 6.6 | 36.6 | Xq28       | SRPK3     | SRSF protein kinase 3 isoform 3 [Homo sapiens].                               |
| 1609 | NP_001020414.1 | 633 | 68 | 6.0 | 35.1 | Xq28       | IRAK1     | interleukin-1 receptor-associated kinase 1 isoform 3 [Homo sapiens].          |
| 1610 | NP_001020413.1 | 682 | 73 | 6.2 | 35.5 | Xq28       | IRAK1     | interleukin-1 receptor-associated kinase 1 isoform 2 [Homo sapiens].          |
| 1611 | NP_001560.2    | 712 | 77 | 6.2 | 36.0 | Xq28       | IRAK1     | interleukin-1 receptor-associated kinase 1 isoform 1 [Homo sapiens].          |
| 1612 | NP_001093326.2 | 487 | 56 | 6.3 | 17.9 | Xq28       | IKBKG     | NF-kappa-B essential modulator isoform b [Homo sapiens].                      |
| 1613 | NP_003630.1    | 419 | 48 | 5.5 | 14.1 | Xq28       | IKBKG     | NF-kappa-B essential modulator isoform a [Homo sapiens].                      |
| 1614 | NP_001093327.1 | 419 | 48 | 5.5 | 14.1 | Xq28       | IKBKG     | NF-kappa-B essential modulator isoform a [Homo sapiens].                      |
| 1615 | NP_001138727.1 | 320 | 37 | 5.8 | 13.4 | Xq28       | IKBKG     | NF-kappa-B essential modulator isoform c [Homo sapiens].                      |
| 1616 | XP_003960221.1 | 270 | 30 | 6.0 | 28.5 | 1          | LOC101060 | PREDICTED: 5'-AMP-activated protein kinase subunit beta-2-like                |
| 1617 | XP_003960220.1 | 272 | 30 | 6.0 | 28.3 | 1          | LOC101060 | PREDICTED: 5'-AMP-activated protein kinase subunit beta-2-like                |
| 1618 | XP_003960222.1 | 190 | 21 | 6.5 | 37.4 | 1          | LOC101060 | PREDICTED: 5'-AMP-activated protein kinase subunit beta-2-like                |
| 1619 | XP_003960585.1 | 149 | 17 | 4.0 | 12.8 | 11q13.1    | LOC100506 | PREDICTED: serine/threonine-protein kinase Nek5-like [Homo sapiens].          |
| 1620 | NP_002489.1    | 506 | 58 | 6.8 | 31.6 | 13q14.13   | NEK3      | serine/threonine-protein kinase Nek3 isoform a [Homo sapiens].                |
| 1621 | XP_003960635.1 | 178 | 21 | 8.9 | 31.5 | 14q32      | CKMT1B    | PREDICTED: creatine kinase U-type, mitochondrial isoform 1 [Homo sapiens].    |
| 1622 | XP_003960636.1 | 113 | 13 | 9.3 | 43.4 | 14q32      | CKMT1B    | PREDICTED: creatine kinase U-type, mitochondrial isoform 2 [Homo sapiens].    |
| 1623 | XP_003960698.1 | 191 | 21 | 9.1 | 12.0 | 14q32      | LOC101060 | PREDICTED: serine/threonine-protein kinase SMG1-like [Homo sapiens].          |
| 1624 | XP_003960679.1 | 839 | 93 | 7.0 | 53.3 | 14q32      | LOC101060 | PREDICTED: serine/threonine-protein kinase SMG1-like [Homo sapiens].          |
| 1625 | XP_003960701.1 | 227 | 25 | 9.6 | 22.0 | 14q32      | LOC101060 | PREDICTED: serine/threonine-protein kinase SMG1-like [Homo sapiens].          |
| 1626 | XP_003960702.1 | 411 | 45 | 6.5 | 58.6 | 14q32      | LOC101060 | PREDICTED: serine/threonine-protein kinase SMG1-like [Homo sapiens].          |
| 1627 | XP_003960802.1 | 118 | 13 | 8.1 | 32.2 | 14q32      | LOC390877 | PREDICTED: adenylate kinase isoenzyme 1-like [Homo sapiens].                  |
| 1628 | XP_003960871.1 | 398 | 45 | 5.8 | 38.4 | 19q13.3    | MAPK11    | PREDICTED: mitogen-activated protein kinase 11 [Homo sapiens].                |
| 1629 | XP_003119578.1 | 223 | 25 | 8.7 | 25.1 | 11q24.2    | LOC100507 | PREDICTED: adenylate kinase isoenzyme 4, mitochondrial-like [Homo sapiens].   |
| 1630 | XP_003960919.1 | 184 | 21 | 9.1 | 39.7 | 11q24.2    | LOC101060 | PREDICTED: nucleoside diphosphate kinase B-like [Homo sapiens].               |
| 1631 | XP_003119604.1 | 149 | 17 | 4.0 | 12.8 | 11q24.2    | LOC100506 | PREDICTED: serine/threonine-protein kinase Nek5-like [Homo sapiens].          |
| 1632 | XP_003960932.1 | 471 | 52 | 7.8 | 35.2 | 11q24.2    | LOC101060 | PREDICTED: 3-phosphoinositide-dependent protein kinase 1-like [Homo sapiens]. |
| 1633 | XP_003403749.3 | 118 | 13 | 8.1 | 32.2 | 11q24.2    | LOC390877 | PREDICTED: adenylate kinase isoenzyme 1-like [Homo sapiens].                  |
| 1634 | XP_003846682.1 | 354 | 39 | 7.6 | 40.4 | 21p11.1    | LOC100996 | PREDICTED: phosphatidylinositol 4-kinase alpha-like [Homo sapiens].           |
| 1635 | XP_003846692.1 | 357 | 41 | 5.4 | 34.7 | 21p11.1    | MAPK12    | PREDICTED: mitogen-activated protein kinase 12 [Homo sapiens].                |
| 1636 | XP_003846795.1 | 142 | 16 | 4.9 | 28.2 | 10         | LOC100996 | PREDICTED: dual specificity mitogen-activated protein kinase kinase           |

### Additional entries:

|   |                |      |     |     |      |        |        |                                                               |
|---|----------------|------|-----|-----|------|--------|--------|---------------------------------------------------------------|
| 1 | NP_001229838.1 | 236  | 26  | 8.8 | 21.2 | 1p34.3 | RSP01  | R-spondin-1 isoform 2 [Homo sapiens].                         |
| 2 | NP_001229839.1 | 200  | 22  | 9.5 | 29.0 | 1p34.3 | RSP01  | R-spondin-1 isoform 3 precursor [Homo sapiens].               |
| 3 | NP_001033722.1 | 263  | 29  | 9.3 | 24.0 | 1p34.3 | RSP01  | R-spondin-1 isoform 1 precursor [Homo sapiens].               |
| 4 | NP_001229837.1 | 263  | 29  | 9.3 | 24.0 | 1p34.3 | RSP01  | R-spondin-1 isoform 1 precursor [Homo sapiens].               |
| 5 | NP_001092909.1 | 1008 | 106 | 6.3 | 40.4 | 1p34.3 | EPHA10 | ephrin type-A receptor 10 isoform 3 precursor [Homo sapiens]. |

|    |                |      |     |      |      |            |          |                                                                    |
|----|----------------|------|-----|------|------|------------|----------|--------------------------------------------------------------------|
| 6  | NP_892021.1    | 582  | 66  | 4.9  | 12.9 | 1p22.2     | ZNF326   | DBIRD complex subunit ZNF326 isoform 1 [Homo sapiens].             |
| 7  | NP_001157945.1 | 605  | 70  | 6.2  | 14.0 | 1p22.1     | FNBP1L   | formin-binding protein 1-like isoform 3 [Homo sapiens].            |
| 8  | NP_060207.2    | 547  | 64  | 5.8  | 12.1 | 1p22.1     | FNBP1L   | formin-binding protein 1-like isoform 2 [Homo sapiens].            |
| 9  | NP_001020119.1 | 551  | 64  | 5.8  | 12.0 | 1p22.1     | FNBP1L   | formin-binding protein 1-like isoform 1 [Homo sapiens].            |
| 10 | NP_004806.3    | 1261 | 142 | 6.3  | 30.2 | 1p22.1     | ARHGAP29 | rho GTPase-activating protein 29 [Homo sapiens].                   |
| 11 | NP_006104.4    | 847  | 98  | 6.6  | 29.4 | 1p13.3     | VAV3     | guanine nucleotide exchange factor VAV3 isoform 1 [Homo sapiens].  |
| 12 | NP_000692.2    | 1023 | 113 | 5.2  | 49.6 | 1p21       | ATP1A1   | sodium/potassium-transporting ATPase subunit alpha-1 isoform a     |
| 13 | NP_001153705.1 | 1023 | 113 | 5.2  | 49.6 | 1p21       | ATP1A1   | sodium/potassium-transporting ATPase subunit alpha-1 isoform c     |
| 14 | NP_001138428.1 | 92   | 11  | 10.0 | 21.7 | 1q21.3     | RIIAD1   | RIIa domain-containing protein 1 [Homo sapiens].                   |
| 15 | NP_056656.2    | 1181 | 131 | 8.7  | 26.1 | 1q21.3     | ADAR     | double-stranded RNA-specific adenosine deaminase isoform c [Homo   |
| 16 | NP_056655.2    | 1200 | 133 | 8.5  | 25.8 | 1q21.3     | ADAR     | double-stranded RNA-specific adenosine deaminase isoform b [Homo   |
| 17 | NP_001102.2    | 1226 | 136 | 8.6  | 26.1 | 1q21.3     | ADAR     | double-stranded RNA-specific adenosine deaminase isoform a [Homo   |
| 18 | NP_001180424.1 | 931  | 104 | 8.7  | 27.8 | 1q21.3     | ADAR     | double-stranded RNA-specific adenosine deaminase isoform d [Homo   |
| 19 | NP_001020278.1 | 931  | 104 | 8.7  | 27.8 | 1q21.3     | ADAR     | double-stranded RNA-specific adenosine deaminase isoform d [Homo   |
| 20 | NP_001155856.1 | 985  | 111 | 6.9  | 27.1 | 1q21-q22   | ARHGEF2  | rho guanine nucleotide exchange factor 2 isoform 2 [Homo sapiens]. |
| 21 | NP_001155855.1 | 986  | 112 | 6.9  | 27.2 | 1q21-q22   | ARHGEF2  | rho guanine nucleotide exchange factor 2 isoform 1 [Homo sapiens]. |
| 22 | NP_004714.2    | 958  | 108 | 6.4  | 27.8 | 1q21-q22   | ARHGEF2  | rho guanine nucleotide exchange factor 2 isoform 3 [Homo sapiens]. |
| 23 | NP_055030.1    | 1297 | 141 | 6.1  | 40.5 | 1q21-q23   | INSRR    | insulin receptor-related protein precursor [Homo sapiens].         |
| 24 | NP_055030.1    | 1297 | 79  | 6.1  | 40.6 | 1q21-q23   | INSRR    | insulin receptor-related protein precursor [Homo sapiens].         |
| 25 | NP_055030.1    | 1297 | 61  | 5.7  | 40.7 | 1q21-q23   | INSRR    | insulin receptor-related protein precursor [Homo sapiens].         |
| 26 | NP_000693.1    | 1020 | 112 | 5.3  | 48.1 | 1q23.2     | ATP1A2   | sodium/potassium-transporting ATPase subunit alpha-2 proprotein    |
| 27 | NP_065156.5    | 688  | 77  | 4.7  | 42.2 | 1q24.2     | SCYL3    | protein-associating with the carboxyl-terminal domain of ezrin     |
| 28 | NP_851607.2    | 742  | 83  | 4.8  | 41.9 | 1q24.2     | SCYL3    | protein-associating with the carboxyl-terminal domain of ezrin     |
| 29 | NP_055679.1    | 409  | 46  | 6.4  | 43.5 | 1q25       | FAM20B   | glycosaminoglycan xylosylkinase [Homo sapiens].                    |
| 30 | NP_066956.1    | 741  | 84  | 6.2  | 32.5 | 1q25       | RNASEL   | 2-5A-dependent ribonuclease [Homo sapiens].                        |
| 31 | NP_001348.2    | 1270 | 141 | 6.4  | 36.9 | 1q25       | DHX9     | ATP-dependent RNA helicase A [Homo sapiens].                       |
| 32 | NP_872604.1    | 418  | 47  | 9.4  | 26.6 | 1q32.1     | RASSF5   | ras association domain-containing protein 5 isoform A [Homo        |
| 33 | NP_872605.1    | 336  | 37  | 9.9  | 25.0 | 1q32.1     | RASSF5   | ras association domain-containing protein 5 isoform B [Homo        |
| 34 | NP_071411.1    | 322  | 34  | 4.8  | 53.7 | 2p23.3     | RBKS     | ribokinase [Homo sapiens].                                         |
| 35 | NP_733772.1    | 690  | 78  | 6.3  | 36.1 | 2p25.1-p24 | RASGRP3  | ras guanyl-releasing protein 3 isoform 1 [Homo sapiens].           |
| 36 | NP_001132960.1 | 690  | 78  | 6.3  | 36.1 | 2p25.1-p24 | RASGRP3  | ras guanyl-releasing protein 3 isoform 1 [Homo sapiens].           |
| 37 | NP_056191.1    | 689  | 78  | 6.3  | 36.1 | 2p25.1-p24 | RASGRP3  | ras guanyl-releasing protein 3 isoform 2 [Homo sapiens].           |
| 38 | NP_550438.1    | 277  | 28  | 6.3  | 36.6 | 2p13       | DGUOK    | deoxyguanosine kinase, mitochondrial isoform a [Homo sapiens].     |
| 39 | NP_149035.1    | 550  | 61  | 6.1  | 34.4 | 2p13.1     | RTKN     | rhotekin isoform b [Homo sapiens].                                 |
| 40 | NP_001015056.1 | 513  | 57  | 6.4  | 34.7 | 2p13.1     | RTKN     | rhotekin isoform c [Homo sapiens].                                 |
| 41 | NP_490595.1    | 730  | 81  | 9.2  | 26.0 | 2q21.3     | CCNT2    | cyclin-T2 isoform b [Homo sapiens].                                |
| 42 | NP_001232.1    | 663  | 74  | 9.5  | 26.2 | 2q21.3     | CCNT2    | cyclin-T2 isoform a [Homo sapiens].                                |
| 43 | NP_001607.1    | 513  | 56  | 5.5  | 39.1 | 2q22.3     | ACVR2A   | activin receptor type-2A precursor [Homo sapiens].                 |
| 44 | NP_001020372.2 | 433  | 50  | 6.2  | 32.1 | 2q31.1     | CHN1     | N-chimaerin isoform 2 [Homo sapiens].                              |
| 45 | NP_001813.1    | 459  | 53  | 6.5  | 30.7 | 2q31.1     | CHN1     | N-chimaerin isoform 1 [Homo sapiens].                              |
| 46 | NP_001193531.1 | 334  | 38  | 8.2  | 37.1 | 2q31.1     | CHN1     | N-chimaerin isoform 3 [Homo sapiens].                              |
| 47 | NP_001025483.1 | 419  | 47  | 8.0  | 39.4 | 2q31.3     | CERKL    | ceramide kinase-like protein isoform 3 [Homo sapiens].             |
| 48 | NP_001153749.1 | 514  | 58  | 7.6  | 41.6 | 2q31.3     | CERKL    | ceramide kinase-like protein isoform 7 [Homo sapiens].             |
| 49 | NP_001025484.1 | 463  | 52  | 8.7  | 37.8 | 2q31.3     | CERKL    | ceramide kinase-like protein isoform 4 [Homo sapiens].             |
| 50 | NP_963842.1    | 532  | 60  | 7.9  | 41.2 | 2q31.3     | CERKL    | ceramide kinase-like protein isoform 1 [Homo sapiens].             |
| 51 | NP_001025482.1 | 558  | 63  | 8.2  | 40.9 | 2q31.3     | CERKL    | ceramide kinase-like protein isoform 2 [Homo sapiens].             |
| 52 | NP_001195.2    | 1038 | 112 | 5.7  | 26.5 | 2q33-q34   | BMPR2    | bone morphogenetic protein receptor type-2 precursor [Homo         |
| 53 | NP_056328.2    | 420  | 42  | 4.6  | 34.3 | 3p25.3     | CRELD1   | cysteine-rich with EGF-like domain protein 1 isoform 2 precursor   |
| 54 | NP_001070883.1 | 420  | 42  | 4.6  | 34.3 | 3p25.3     | CRELD1   | cysteine-rich with EGF-like domain protein 1 isoform 2 precursor   |
| 55 | NP_002871.1    | 648  | 73  | 9.5  | 34.4 | 3p25       | RAF1     | RAF proto-oncogene serine/threonine-protein kinase [Homo sapiens]. |
| 56 | NP_001020018.1 | 592  | 65  | 5.3  | 31.1 | 3p22       | TGFBR2   | TGF-beta receptor type-2 isoform A precursor [Homo sapiens].       |
| 57 | NP_003233.4    | 567  | 62  | 5.3  | 31.6 | 3p22       | TGFBR2   | TGF-beta receptor type-2 isoform B precursor [Homo sapiens].       |
| 58 | NP_003140.1    | 402  | 45  | 8.5  | 21.4 | 3p22.3     | STAC     | SH3 and cysteine-rich domain-containing protein [Homo sapiens].    |
| 59 | NP_001097.2    | 512  | 56  | 5.4  | 33.4 | 3p22       | ACVR2B   | activin receptor type-2B precursor [Homo sapiens].                 |
| 60 | NP_009113.3    | 340  | 39  | 9.1  | 24.7 | 3p21.3     | RASSF1   | ras association domain-containing protein 1 isoform A [Homo        |
| 61 | NP_733832.1    | 344  | 39  | 9.1  | 24.4 | 3p21.3     | RASSF1   | ras association domain-containing protein 1 isoform D [Homo        |
| 62 | NP_001007566.1 | 400  | 43  | 4.8  | 17.5 | 3q12.2     | TFG      | protein TFG isoform 1 [Homo sapiens].                              |
| 63 | NP_006061.2    | 400  | 43  | 4.8  | 17.5 | 3q12.2     | TFG      | protein TFG isoform 1 [Homo sapiens].                              |
| 64 | NP_001182407.1 | 400  | 43  | 4.8  | 17.5 | 3q12.2     | TFG      | protein TFG isoform 1 [Homo sapiens].                              |

|     |                |      |     |      |      |            |          |                                                                     |
|-----|----------------|------|-----|------|------|------------|----------|---------------------------------------------------------------------|
| 65  | NP_001182408.1 | 396  | 43  | 4.9  | 17.7 | 3q12.2     | TFG      | protein TFG isoform 2 [Homo sapiens].                               |
| 66  | NP_444256.3    | 1794 | 197 | 6.1  | 27.0 | 3q21       | MYLK     | myosin light chain kinase, smooth muscle isoform 3B [Homo sapiens]. |
| 67  | NP_444254.3    | 1845 | 203 | 5.8  | 26.7 | 3q21       | MYLK     | myosin light chain kinase, smooth muscle isoform 2 [Homo sapiens].  |
| 68  | NP_444255.3    | 1863 | 205 | 6.1  | 27.1 | 3q21       | MYLK     | myosin light chain kinase, smooth muscle isoform 3A [Homo sapiens]. |
| 69  | NP_444253.3    | 1914 | 211 | 5.8  | 26.8 | 3q21       | MYLK     | myosin light chain kinase, smooth muscle isoform 1 [Homo sapiens].  |
| 70  | NP_060048.2    | 212  | 24  | 5.4  | 48.1 | 3q21.1     | ROPN1    | ropporin-1A [Homo sapiens].                                         |
| 71  | NP_001012337.1 | 212  | 24  | 4.9  | 52.4 | 3q21.2     | ROPN1B   | ropporin-1B [Homo sapiens].                                         |
| 72  | NP_006497.2    | 849  | 97  | 6.8  | 33.7 | 3q22-q23   | RASA2    | ras GTPase-activating protein 2 [Homo sapiens].                     |
| 73  | NP_003694.1    | 857  | 98  | 7.3  | 26.8 | 4p16.3     | NOP14    | nucleolar protein 14 [Homo sapiens].                                |
| 74  | NP_000779.1    | 260  | 31  | 5.0  | 26.2 | 4q13.3-q21 | DCK      | deoxycytidine kinase [Homo sapiens].                                |
| 75  | NP_079350.5    | 4012 | 441 | 5.2  | 35.6 | 4q21.21    | FRAS1    | extracellular matrix protein FRAS1 isoform 1 precursor [Homo        |
| 76  | NP_001159605.1 | 1976 | 214 | 5.4  | 34.4 | 4q21.21    | FRAS1    | extracellular matrix protein FRAS1 isoform 2 precursor [Homo        |
| 77  | NP_542416.1    | 2490 | 278 | 6.0  | 30.0 | 4q21.3     | PTPN13   | tyrosine-protein phosphatase non-receptor type 13 isoform 4 [Homo   |
| 78  | NP_542414.1    | 2485 | 277 | 6.0  | 30.0 | 4q21.3     | PTPN13   | tyrosine-protein phosphatase non-receptor type 13 isoform 1 [Homo   |
| 79  | NP_006255.1    | 2466 | 275 | 6.0  | 30.1 | 4q21.3     | PTPN13   | tyrosine-protein phosphatase non-receptor type 13 isoform 2 [Homo   |
| 80  | NP_542415.1    | 2294 | 256 | 5.8  | 30.3 | 4q21.3     | PTPN13   | tyrosine-protein phosphatase non-receptor type 13 isoform 3 [Homo   |
| 81  | NP_001228.1    | 432  | 49  | 6.1  | 35.0 | 4q27       | CCNA2    | cyclin-A2 [Homo sapiens].                                           |
| 82  | NP_640336.1    | 576  | 64  | 9.3  | 36.3 | 4q27       | ADAD1    | adenosine deaminase domain-containing protein 1 isoform 1 [Homo     |
| 83  | NP_001152757.1 | 565  | 63  | 9.1  | 36.3 | 4q27       | ADAD1    | adenosine deaminase domain-containing protein 1 isoform 2 [Homo     |
| 84  | NP_001152767.1 | 558  | 62  | 9.3  | 36.9 | 4q27       | ADAD1    | adenosine deaminase domain-containing protein 1 isoform 3 [Homo     |
| 85  | NP_776297.2    | 866  | 97  | 5.7  | 50.8 | 4q33       | CLCN3    | H(+)/Cl(-) exchange transporter 3 isoform e [Homo sapiens].         |
| 86  | NP_001820.2    | 818  | 91  | 5.8  | 53.3 | 4q33       | CLCN3    | H(+)/Cl(-) exchange transporter 3 isoform b [Homo sapiens].         |
| 87  | NP_001230301.1 | 791  | 88  | 6.0  | 52.1 | 4q33       | CLCN3    | H(+)/Cl(-) exchange transporter 3 isoform a [Homo sapiens].         |
| 88  | NP_001230303.1 | 791  | 88  | 6.6  | 53.4 | 4q33       | CLCN3    | H(+)/Cl(-) exchange transporter 3 isoform c [Homo sapiens].         |
| 89  | NP_114122.2    | 230  | 26  | 7.6  | 30.0 | 5p15.2     | ROPN1L   | ropporin-1-like protein [Homo sapiens].                             |
| 90  | NP_001188395.1 | 230  | 26  | 7.6  | 30.0 | 5p15.2     | ROPN1L   | ropporin-1-like protein [Homo sapiens].                             |
| 91  | NP_001093882.1 | 1337 | 155 | 7.9  | 24.3 | 5p13.3     | DROSHA   | ribonuclease 3 isoform 2 [Homo sapiens].                            |
| 92  | NP_037367.3    | 1374 | 159 | 7.7  | 24.5 | 5p13.3     | DROSHA   | ribonuclease 3 isoform 1 [Homo sapiens].                            |
| 93  | NP_001073948.2 | 1731 | 195 | 5.7  | 28.9 | 5q13.2     | ARHGEF28 | rho guanine nucleotide exchange factor 28 isoform 1 [Homo sapiens]. |
| 94  | NP_001171164.1 | 1705 | 192 | 5.6  | 28.9 | 5q13.2     | ARHGEF28 | rho guanine nucleotide exchange factor 28 isoform 2 [Homo sapiens]. |
| 95  | NP_001231293.1 | 1392 | 157 | 6.0  | 25.4 | 5q13.2     | ARHGEF28 | rho guanine nucleotide exchange factor 28 isoform 3 [Homo sapiens]. |
| 96  | NP_004559.4    | 376  | 43  | 5.0  | 39.1 | 6p25       | SERPINB6 | serpin B6 [Homo sapiens].                                           |
| 97  | NP_001182220.1 | 376  | 43  | 5.0  | 39.1 | 6p25       | SERPINB6 | serpin B6 [Homo sapiens].                                           |
| 98  | NP_001243647.1 | 783  | 79  | 4.3  | 47.0 | 6q14.2     | SNAP91   | clathrin coat assembly protein AP180 isoform e [Homo sapiens].      |
| 99  | NP_116173.2    | 272  | 31  | 9.7  | 21.0 | 6q22.33    | RSPO3    | R-spondin-3 precursor [Homo sapiens].                               |
| 100 | NP_004058.1    | 468  | 54  | 7.1  | 30.8 | 7p15.3     | CHN2     | beta-chimaerin isoform 2 [Homo sapiens].                            |
| 101 | NP_001035025.1 | 332  | 38  | 7.9  | 40.7 | 7p15.3     | CHN2     | beta-chimaerin isoform 1 [Homo sapiens].                            |
| 102 | NP_057700.3    | 588  | 67  | 4.8  | 33.0 | 7p14.1     | NME8     | thioredoxin domain-containing protein 3 [Homo sapiens].             |
| 103 | NP_001231509.1 | 3859 | 438 | 8.1  | 45.9 | 7q21.2-q22 | TRRAP    | transformation/transcription domain-associated protein isoform 1    |
| 104 | NP_003487.1    | 3830 | 434 | 8.1  | 46.0 | 7q21.2-q22 | TRRAP    | transformation/transcription domain-associated protein isoform 2    |
| 105 | NP_055706.1    | 181  | 21  | 9.4  | 4.4  | 7q22.1     | PDAP1    | 28 kDa heat- and acid-stable phosphoprotein [Homo sapiens].         |
| 106 | NP_001009571.2 | 1255 | 143 | 5.7  | 33.9 | 7q31.3     | CADPS2   | calcium-dependent secretion activator 2 isoform b [Homo sapiens].   |
| 107 | NP_060424.9    | 1296 | 148 | 5.8  | 34.5 | 7q31.3     | CADPS2   | calcium-dependent secretion activator 2 isoform a [Homo sapiens].   |
| 108 | NP_001161412.1 | 1300 | 148 | 5.7  | 34.4 | 7q31.3     | CADPS2   | calcium-dependent secretion activator 2 isoform c [Homo sapiens].   |
| 109 | NP_060708.1    | 422  | 43  | 6.7  | 36.1 | 7q34       | AGK      | acylglycerol kinase, mitochondrial precursor [Homo sapiens].        |
| 110 | NP_004436.2    | 1021 | 111 | 6.2  | 39.9 | 7q33-q35   | EPHB6    | ephrin type-B receptor 6 precursor [Homo sapiens].                  |
| 111 | NP_060962.2    | 322  | 36  | 4.8  | 35.7 | 8p21.2     | PBK      | lymphokine-activated killer T-cell-originated protein kinase [Homo  |
| 112 | NP_001157853.1 | 538  | 59  | 10.0 | 23.2 | 8q21.11    | STAU2    | double-stranded RNA-binding protein Staufen homolog 2 isoform b     |
| 113 | NP_001157852.1 | 570  | 63  | 10.0 | 23.2 | 8q21.11    | STAU2    | double-stranded RNA-binding protein Staufen homolog 2 isoform a     |
| 114 | NP_001157854.1 | 504  | 55  | 9.8  | 25.2 | 8q21.11    | STAU2    | double-stranded RNA-binding protein Staufen homolog 2 isoform c     |
| 115 | NP_001157855.1 | 398  | 43  | 9.9  | 24.1 | 8q21.11    | STAU2    | double-stranded RNA-binding protein Staufen homolog 2 isoform d     |
| 116 | NP_055208.2    | 479  | 53  | 10.1 | 23.6 | 8q21.11    | STAU2    | double-stranded RNA-binding protein Staufen homolog 2 isoform e     |
| 117 | NP_001157856.1 | 479  | 53  | 10.1 | 23.6 | 8q21.11    | STAU2    | double-stranded RNA-binding protein Staufen homolog 2 isoform e     |
| 118 | NP_001157857.1 | 473  | 52  | 10.1 | 22.8 | 8q21.11    | STAU2    | double-stranded RNA-binding protein Staufen homolog 2 isoform f     |
| 119 | NP_443156.2    | 670  | 74  | 7.2  | 33.3 | 8q24.3     | RHPN1    | rhophilin-1 [Homo sapiens].                                         |
| 120 | NP_006368.3    | 1591 | 181 | 5.6  | 28.0 | 9p13.3     | UNC13B   | protein unc-13 homolog B [Homo sapiens].                            |
| 121 | NP_004808.2    | 1190 | 134 | 7.0  | 20.2 | 9q13-q21   | TJP2     | tight junction protein ZO-2 isoform 1 [Homo sapiens].               |
| 122 | NP_963923.1    | 1043 | 118 | 6.5  | 22.2 | 9q13-q21   | TJP2     | tight junction protein ZO-2 isoform 2 [Homo sapiens].               |
| 123 | NP_001164101.1 | 993  | 112 | 7.1  | 24.7 | 9q13-q21   | TJP2     | tight junction protein ZO-2 isoform 6 [Homo sapiens].               |

|     |                |      |     |      |      |           |          |                                                                     |
|-----|----------------|------|-----|------|------|-----------|----------|---------------------------------------------------------------------|
| 124 | NP_001163887.1 | 1221 | 137 | 8.1  | 21.3 | 9q13-q21  | TJP2     | tight junction protein ZO-2 isoform 3 [Homo sapiens].               |
| 125 | NP_001163886.1 | 1157 | 130 | 7.3  | 21.0 | 9q13-q21  | TJP2     | tight junction protein ZO-2 isoform 4 [Homo sapiens].               |
| 126 | NP_001163885.1 | 1020 | 115 | 6.3  | 22.5 | 9q13-q21  | TJP2     | tight junction protein ZO-2 isoform 5 [Homo sapiens].               |
| 127 | NP_001177411.1 | 1860 | 194 | 5.4  | 23.9 | 9q21.3    | PCSK5    | proprotein convertase subtilisin/kexin type 5 isoform 1             |
| 128 | NP_006191.2    | 913  | 89  | 6.1  | 26.7 | 9q21.3    | PCSK5    | proprotein convertase subtilisin/kexin type 5 isoform 2             |
| 129 | NP_001177874.1 | 416  | 46  | 5.7  | 33.4 | 9q33-q34  | TRAF1    | TNF receptor-associated factor 1 isoform a [Homo sapiens].          |
| 130 | NP_005649.1    | 416  | 46  | 5.7  | 33.4 | 9q33-q34  | TRAF1    | TNF receptor-associated factor 1 isoform a [Homo sapiens].          |
| 131 | NP_001177876.1 | 294  | 33  | 6.2  | 36.1 | 9q33-q34  | TRAF1    | TNF receptor-associated factor 1 isoform b [Homo sapiens].          |
| 132 | NP_060857.2    | 672  | 74  | 8.9  | 32.7 | 9q33.3    | STRBP    | spermatid perinuclear RNA-binding protein isoform 1 [Homo sapiens]. |
| 133 | NP_001164608.1 | 658  | 72  | 8.8  | 33.1 | 9q33.3    | STRBP    | spermatid perinuclear RNA-binding protein isoform 2 [Homo sapiens]. |
| 134 | NP_003362.2    | 839  | 97  | 6.5  | 29.9 | 9q34.1    | VAV2     | guanine nucleotide exchange factor VAV2 isoform 2 [Homo sapiens].   |
| 135 | NP_001127870.1 | 878  | 101 | 6.7  | 30.6 | 9q34.1    | VAV2     | guanine nucleotide exchange factor VAV2 isoform 1 [Homo sapiens].   |
| 136 | NP_066961.2    | 501  | 56  | 7.3  | 38.1 | 9q34      | TRAF2    | TNF receptor-associated factor 2 [Homo sapiens].                    |
| 137 | NP_061172.1    | 739  | 81  | 10.6 | 33.4 | 10p15.3   | ADARB2   | double-stranded RNA-specific editase B2 [Homo sapiens].             |
| 138 | NP_079114.3    | 743  | 83  | 6.7  | 45.1 | 10p12.1   | THNSL1   | threonine synthase-like 1 [Homo sapiens].                           |
| 139 | NP_001018081.3 | 1309 | 144 | 6.3  | 37.1 | 10q11.22  | FRMPD2   | FERM and PDZ domain-containing protein 2 isoform 3 [Homo sapiens].  |
| 140 | NP_660350.2    | 609  | 69  | 7.7  | 30.9 | 10q21.2   | RTKN2    | rhotekin-2 [Homo sapiens].                                          |
| 141 | NP_002649.1    | 431  | 18  | 8.5  | 17.2 | 10q24     | PLAU     | urokinase-type plasminogen activator isoform 1 preproprotein [Homo  |
| 142 | NP_002649.1    | 431  | 3   | 10.2 | 0.0  | 10q24     | PLAU     | urokinase-type plasminogen activator isoform 1 preproprotein [Homo  |
| 143 | NP_002649.1    | 431  | 28  | 7.7  | 33.6 | 10q24     | PLAU     | urokinase-type plasminogen activator isoform 1 preproprotein [Homo  |
| 144 | NP_001138503.1 | 414  | 47  | 8.3  | 27.8 | 10q24     | PLAU     | urokinase-type plasminogen activator isoform 2 [Homo sapiens].      |
| 145 | NP_004738.3    | 1919 | 214 | 7.1  | 23.8 | 10q23     | DLG5     | disks large homolog 5 [Homo sapiens].                               |
| 146 | NP_001017423.1 | 793  | 87  | 6.7  | 47.7 | 10q24.3   | ALDH18A1 | delta-1-pyrroline-5-carboxylate synthase isoform 2 [Homo sapiens].  |
| 147 | NP_776152.1    | 1154 | 129 | 5.7  | 32.1 | 10q26.12  | PDZD8    | PDZ domain-containing protein 8 [Homo sapiens].                     |
| 148 | NP_006532.2    | 335  | 37  | 5.2  | 36.1 | 10q26     | GLRX3    | glutaredoxin-3 [Homo sapiens].                                      |
| 149 | NP_001186797.1 | 335  | 37  | 5.2  | 36.1 | 10q26     | GLRX3    | glutaredoxin-3 [Homo sapiens].                                      |
| 150 | NP_055159.2    | 437  | 49  | 11.1 | 35.9 | 11p13     | FJX1     | four-jointed box protein 1 precursor [Homo sapiens].                |
| 151 | NP_001092140.1 | 609  | 69  | 7.6  | 37.6 | 11q13     | RASGRP2  | RAS guanyl-releasing protein 2 [Homo sapiens].                      |
| 152 | NP_001092141.1 | 609  | 69  | 7.6  | 37.6 | 11q13     | RASGRP2  | RAS guanyl-releasing protein 2 [Homo sapiens].                      |
| 153 | NP_722541.1    | 609  | 69  | 7.6  | 37.6 | 11q13     | RASGRP2  | RAS guanyl-releasing protein 2 [Homo sapiens].                      |
| 154 | NP_689645.2    | 874  | 99  | 7.9  | 28.0 | 11q22.1   | ARHGAP42 | rho GTPase-activating protein 42 [Homo sapiens].                    |
| 155 | NP_001231.2    | 726  | 81  | 9.0  | 24.2 | 12q13.11  | CCNT1    | cyclin-T1 [Homo sapiens].                                           |
| 156 | NP_037409.2    | 632  | 71  | 9.1  | 30.5 | 12q13.12  | RACGAP1  | rac GTPase-activating protein 1 [Homo sapiens].                     |
| 157 | NP_001119575.1 | 632  | 71  | 9.1  | 30.5 | 12q13.12  | RACGAP1  | rac GTPase-activating protein 1 [Homo sapiens].                     |
| 158 | NP_001119576.1 | 632  | 71  | 9.1  | 30.5 | 12q13.12  | RACGAP1  | rac GTPase-activating protein 1 [Homo sapiens].                     |
| 159 | NP_056134.2    | 1419 | 154 | 8.2  | 29.6 | 12q13.13  | TENC1    | tensin-like C1 domain-containing phosphatase isoform 1 [Homo        |
| 160 | NP_736610.2    | 1409 | 153 | 8.2  | 29.2 | 12q13.13  | TENC1    | tensin-like C1 domain-containing phosphatase isoform 2 [Homo        |
| 161 | NP_065434.1    | 573  | 63  | 5.5  | 33.0 | 12q13     | AMHR2    | anti-Muellerian hormone type-2 receptor isoform 1 precursor [Homo   |
| 162 | NP_599150.1    | 366  | 39  | 6.1  | 38.3 | 12q12-q13 | TARBP2   | RISC-loading complex subunit TARBP2 isoform a [Homo sapiens].       |
| 163 | NP_599151.2    | 345  | 37  | 7.1  | 37.1 | 12q12-q13 | TARBP2   | RISC-loading complex subunit TARBP2 isoform b [Homo sapiens].       |
| 164 | NP_004169.3    | 345  | 37  | 7.1  | 37.1 | 12q12-q13 | TARBP2   | RISC-loading complex subunit TARBP2 isoform b [Homo sapiens].       |
| 165 | NP_659501.1    | 364  | 42  | 6.5  | 16.5 | 12q13.3   | STAC3    | SH3 and cysteine-rich domain-containing protein 3 [Homo sapiens].   |
| 166 | NP_002920.1    | 563  | 64  | 5.5  | 34.8 | 13q34     | GRK1     | rhodopsin kinase [Homo sapiens].                                    |
| 167 | NP_031394.2    | 834  | 96  | 6.8  | 33.6 | 13q34     | RASA3    | ras GTPase-activating protein 3 [Homo sapiens].                     |
| 168 | NP_663777.1    | 568  | 64  | 7.8  | 29.6 | 14q32.32  | TRAF3    | TNF receptor-associated factor 3 isoform 1 [Homo sapiens].          |
| 169 | NP_003291.2    | 568  | 64  | 7.8  | 29.6 | 14q32.32  | TRAF3    | TNF receptor-associated factor 3 isoform 1 [Homo sapiens].          |
| 170 | NP_783297.2    | 1668 | 187 | 6.3  | 16.5 | 15q13     | TJP1     | tight junction protein ZO-1 isoform b [Homo sapiens].               |
| 171 | NP_003248.3    | 1748 | 195 | 6.2  | 16.1 | 15q13     | TJP1     | tight junction protein ZO-1 isoform a [Homo sapiens].               |
| 172 | NP_001122074.1 | 762  | 87  | 7.6  | 34.1 | 15q14     | RASGRP1  | RAS guanyl-releasing protein 1 isoform b [Homo sapiens].            |
| 173 | NP_005730.2    | 797  | 90  | 7.8  | 34.0 | 15q14     | RASGRP1  | RAS guanyl-releasing protein 1 isoform a [Homo sapiens].            |
| 174 | NP_001074003.1 | 2214 | 251 | 5.6  | 25.7 | 15q21.3   | UNC13C   | protein unc-13 homolog C [Homo sapiens].                            |
| 175 | NP_008832.2    | 2548 | 293 | 9.1  | 28.3 | 15q22-q23 | MYO9A    | unconventional myosin-IXa [Homo sapiens].                           |
| 176 | NP_002560.1    | 794  | 74  | 5.1  | 33.8 | 15q26.1   | FURIN    | furin preproprotein [Homo sapiens].                                 |
| 177 | NP_000866.1    | 1367 | 81  | 6.3  | 34.9 | 15q26.3   | IGF1R    | insulin-like growth factor 1 receptor precursor [Homo sapiens].     |
| 178 | NP_000866.1    | 1367 | 71  | 5.0  | 32.2 | 15q26.3   | IGF1R    | insulin-like growth factor 1 receptor precursor [Homo sapiens].     |
| 179 | NP_612192.1    | 956  | 89  | 6.5  | 30.6 | 15q26.3   | PCSK6    | proprotein convertase subtilisin/kexin type 6 isoform b             |
| 180 | NP_002561.1    | 969  | 90  | 6.5  | 30.9 | 15q26.3   | PCSK6    | proprotein convertase subtilisin/kexin type 6 isoform a             |
| 181 | NP_612194.1    | 962  | 89  | 6.7  | 30.6 | 15q26.3   | PCSK6    | proprotein convertase subtilisin/kexin type 6 isoform h             |
| 182 | NP_612193.1    | 975  | 91  | 6.7  | 30.9 | 15q26.3   | PCSK6    | proprotein convertase subtilisin/kexin type 6 isoform g             |



|     |                |      |     |     |      |            |           |                                                                   |
|-----|----------------|------|-----|-----|------|------------|-----------|-------------------------------------------------------------------|
| 183 | NP_150296.3    | 974  | 107 | 6.8 | 38.2 | 16p12.2    | ERN2      | serine/threonine-protein kinase/endoribonuclease IRE2 [Homo       |
| 184 | NP_005872.2    | 412  | 43  | 8.1 | 33.5 | 16p11.2    | BCKDK     | [3-methyl-2-oxobutanoate dehydrogenase [lipoamide]] kinase,       |
| 185 | NP_001116429.1 | 365  | 41  | 9.1 | 34.5 | 16p11.2    | BCKDK     | [3-methyl-2-oxobutanoate dehydrogenase [lipoamide]] kinase,       |
| 186 | NP_001180453.1 | 1233 | 133 | 6.0 | 32.8 | 16q22.1    | FAM65A    | protein FAM65A isoform 4 [Homo sapiens].                          |
| 187 | NP_001180451.1 | 1223 | 132 | 5.8 | 33.1 | 16q22.1    | FAM65A    | protein FAM65A isoform 2 [Homo sapiens].                          |
| 188 | NP_078795.2    | 1219 | 132 | 5.8 | 32.9 | 16q22.1    | FAM65A    | protein FAM65A isoform 1 [Homo sapiens].                          |
| 189 | NP_060273.1    | 493  | 55  | 6.7 | 41.4 | 16q22.1    | DUS2L     | tRNA-dihydrouridine(20) synthase [NAD(P)+]-like [Homo sapiens].   |
| 190 | NP_631913.3    | 665  | 71  | 8.6 | 47.5 | 16q24.1    | ADAD2     | adenosine deaminase domain-containing protein 2 isoform 1 [Homo   |
| 191 | NP_001138872.1 | 583  | 62  | 8.9 | 47.2 | 16q24.1    | ADAD2     | adenosine deaminase domain-containing protein 2 isoform 2 [Homo   |
| 192 | NP_115827.1    | 714  | 80  | 7.4 | 28.9 | 16q24      | SPIRE2    | protein spire homolog 2 [Homo sapiens].                           |
| 193 | NP_997397.1    | 512  | 59  | 6.1 | 33.4 | 16q24.3    | DEF8      | differentially expressed in FDCP 8 homolog isoform 1 [Homo        |
| 194 | NP_001229747.1 | 451  | 52  | 5.8 | 33.0 | 16q24.3    | DEF8      | differentially expressed in FDCP 8 homolog isoform 5 [Homo        |
| 195 | NP_001229749.1 | 451  | 52  | 5.8 | 33.0 | 16q24.3    | DEF8      | differentially expressed in FDCP 8 homolog isoform 5 [Homo        |
| 196 | NP_001229748.1 | 434  | 50  | 6.0 | 34.1 | 16q24.3    | DEF8      | differentially expressed in FDCP 8 homolog isoform 6 [Homo        |
| 197 | NP_001229745.1 | 441  | 51  | 5.9 | 32.0 | 16q24.3    | DEF8      | differentially expressed in FDCP 8 homolog isoform 3 [Homo        |
| 198 | NP_001229746.1 | 391  | 45  | 6.3 | 37.1 | 16q24.3    | DEF8      | differentially expressed in FDCP 8 homolog isoform 4 [Homo        |
| 199 | NP_001028723.1 | 457  | 50  | 4.4 | 26.9 | 17p11.2    | TOM1L2    | TOM1-like protein 2 isoform 1 [Homo sapiens].                     |
| 200 | NP_945344.1    | 411  | 45  | 7.0 | 25.8 | 17q12      | STAC2     | SH3 and cysteine-rich domain-containing protein 2 [Homo sapiens]. |
| 201 | NP_001035997.2 | 593  | 65  | 7.4 | 45.9 | 17q12-q21  | COASY     | bifunctional coenzyme A synthase isoform c [Homo sapiens].        |
| 202 | NP_079509.5    | 564  | 62  | 6.5 | 46.3 | 17q12-q21  | COASY     | bifunctional coenzyme A synthase isoform a precursor [Homo        |
| 203 | NP_001035994.1 | 564  | 62  | 6.5 | 46.3 | 17q12-q21  | COASY     | bifunctional coenzyme A synthase isoform a precursor [Homo        |
| 204 | NP_114068.1    | 966  | 107 | 4.9 | 31.0 | 17q21.31   | NBR1      | next to BRCA1 gene 1 protein [Homo sapiens].                      |
| 205 | NP_005890.2    | 966  | 107 | 4.9 | 31.0 | 17q21.31   | NBR1      | next to BRCA1 gene 1 protein [Homo sapiens].                      |
| 206 | NP_114064.1    | 966  | 107 | 4.9 | 31.0 | 17q21.31   | NBR1      | next to BRCA1 gene 1 protein [Homo sapiens].                      |
| 207 | NP_001018146.1 | 267  | 30  | 9.3 | 39.7 | 17q21.3    | NME1-NME2 | NME1-NME2 protein [Homo sapiens].                                 |
| 208 | NP_001424.3    | 977  | 110 | 6.0 | 33.7 | 17q24.2    | ERN1      | serine/threonine-protein kinase/endoribonuclease IRE1 precursor   |
| 209 | NP_060035.2    | 541  | 58  | 7.5 | 41.1 | 17q24.2    | FAM20A    | protein FAM20A isoform a precursor [Homo sapiens].                |
| 210 | NP_001230675.1 | 403  | 46  | 6.2 | 45.9 | 17q24.2    | FAM20A    | protein FAM20A isoform b [Homo sapiens].                          |
| 211 | NP_001166175.1 | 592  | 63  | 5.5 | 40.5 | 17q25.1    | GGA3      | ADP-ribosylation factor-binding protein GGA3 isoform 2 [Homo      |
| 212 | NP_001166174.1 | 651  | 70  | 5.8 | 38.1 | 17q25.1    | GGA3      | ADP-ribosylation factor-binding protein GGA3 isoform 1 [Homo      |
| 213 | NP_059345.1    | 552  | 61  | 9.2 | 21.0 | 17q25      | BAIAP2    | brain-specific angiogenesis inhibitor 1-associated protein 2      |
| 214 | NP_001138360.1 | 534  | 59  | 9.4 | 21.7 | 17q25      | BAIAP2    | brain-specific angiogenesis inhibitor 1-associated protein 2      |
| 215 | NP_006331.1    | 520  | 57  | 9.1 | 22.7 | 17q25      | BAIAP2    | brain-specific angiogenesis inhibitor 1-associated protein 2      |
| 216 | NP_059344.1    | 521  | 57  | 9.2 | 23.0 | 17q25      | BAIAP2    | brain-specific angiogenesis inhibitor 1-associated protein 2      |
| 217 | NP_064533.3    | 742  | 84  | 8.6 | 23.2 | 18p11.21   | SPIRE1    | protein spire homolog 1 isoform b [Homo sapiens].                 |
| 218 | NP_001122098.1 | 756  | 86  | 8.6 | 23.8 | 18p11.21   | SPIRE1    | protein spire homolog 1 isoform a [Homo sapiens].                 |
| 219 | NP_001122099.1 | 622  | 72  | 8.8 | 21.7 | 18p11.21   | SPIRE1    | protein spire homolog 1 isoform c [Homo sapiens].                 |
| 220 | NP_005015.1    | 397  | 45  | 5.8 | 31.7 | 18q21.3    | SERPINB10 | serpin B10 [Homo sapiens].                                        |
| 221 | NP_277048.2    | 290  | 31  | 9.3 | 41.0 | 19p13.3    | TPGS1     | tubulin polyglutamylase complex subunit 1 [Homo sapiens].         |
| 222 | NP_036424.2    | 1136 | 1   | 3.7 | 11.1 | 19p13.3    | HMHA1     | minor histocompatibility protein HA-1 isoform 1 [Homo sapiens].   |
| 223 | NP_060043.2    | 755  | 70  | 6.4 | 37.7 | 19p13.3    | PCSK4     | proprotein convertase subtilisin/kexin type 4 precursor [Homo     |
| 224 | NP_001254490.1 | 928  | 102 | 6.3 | 24.0 | 19p13.3    | TJP3      | tight junction protein ZO-3 isoform 2 [Homo sapiens].             |
| 225 | NP_001254489.1 | 919  | 101 | 6.3 | 23.8 | 19p13.3    | TJP3      | tight junction protein ZO-3 isoform 1 [Homo sapiens].             |
| 226 | NP_004231.1    | 545  | 63  | 5.1 | 14.7 | 19p13.3    | TRIP10    | cdc42-interacting protein 4 [Homo sapiens].                       |
| 227 | NP_005419.2    | 845  | 98  | 6.2 | 25.8 | 19p13.2    | VAV1      | proto-oncogene vav isoform 1 [Homo sapiens].                      |
| 228 | NP_001245135.1 | 823  | 96  | 6.0 | 26.4 | 19p13.2    | VAV1      | proto-oncogene vav isoform 2 [Homo sapiens].                      |
| 229 | NP_001245136.1 | 813  | 94  | 6.3 | 27.1 | 19p13.2    | VAV1      | proto-oncogene vav isoform 3 [Homo sapiens].                      |
| 230 | NP_001073285.1 | 1370 | 83  | 5.9 | 33.2 | 19p13.3-p1 | INSR      | insulin receptor isoform Short preproprotein [Homo sapiens].      |
| 231 | NP_001073285.1 | 1370 | 70  | 5.3 | 33.1 | 19p13.3-p1 | INSR      | insulin receptor isoform Short preproprotein [Homo sapiens].      |
| 232 | NP_008996.1    | 378  | 44  | 5.0 | 14.3 | 19p13.2    | CDC37     | hsp90 co-chaperone Cdc37 [Homo sapiens].                          |
| 233 | NP_060090.2    | 898  | 96  | 9.1 | 23.2 | 19p13.2    | ILF3      | interleukin enhancer-binding factor 3 isoform d [Homo sapiens].   |
| 234 | NP_036350.2    | 894  | 95  | 9.0 | 23.4 | 19p13.2    | ILF3      | interleukin enhancer-binding factor 3 isoform a [Homo sapiens].   |
| 235 | NP_703194.1    | 690  | 75  | 8.3 | 30.6 | 19p13.2    | ILF3      | interleukin enhancer-binding factor 3 isoform c [Homo sapiens].   |
| 236 | NP_001131145.1 | 706  | 77  | 7.8 | 29.6 | 19p13.2    | ILF3      | interleukin enhancer-binding factor 3 isoform e [Homo sapiens].   |
| 237 | NP_004507.2    | 702  | 76  | 7.6 | 29.9 | 19p13.2    | ILF3      | interleukin enhancer-binding factor 3 isoform b [Homo sapiens].   |
| 238 | NP_004136.2    | 2157 | 243 | 8.9 | 29.1 | 19p13.1    | MYO9B     | unconventional myosin-IXb isoform 1 [Homo sapiens].               |
| 239 | NP_001123537.1 | 2022 | 229 | 8.6 | 29.1 | 19p13.1    | MYO9B     | unconventional myosin-IXb isoform 2 [Homo sapiens].               |
| 240 | NP_001073890.2 | 1703 | 193 | 5.1 | 28.3 | 19p13.11   | UNC13A    | protein unc-13 homolog A [Homo sapiens].                          |
| 241 | NP_057657.2    | 970  | 107 | 5.4 | 24.6 | 19p13.11   | GMIP      | GEM-interacting protein [Homo sapiens].                           |
